# Supplementary material for: A DNA barcode library for mangrove gastropods and crabs of Hong Kong and the Greater Bay Area reveals an unexpected faunal diversity associated with the intertidal forests of Southern China
Source: BMC Ecol Evol. 2021 Sep 23;21:180. doi: 10.1186/s12862-021-01914-6 (PMC8459539; doi:10.1186/s12862-021-01914-6)
Supplement: Supplementary file 1 — Additional file 1. Taxonomic characterization, GenBank accession numbers, museum vouchers ID and details of the sampling sites of all the specimens sequenced for this study. [file 12862_2021_1914_MOESM1_ESM.xlsx]

## Sheet: Table S1
Class	Order	Infra-order	Family	Species	DNA ID	GenBank accession number	Museum voucher ID	Site sampling	latitude	longitude	three-gap del. in pos. 106-108
Malacostraca	Decapoda	Brachyura	Dotillidae	Dotilla wichmanni	16_20	MZ832041	SWIMS-CRU-20-008	Pui O	22.2403	113.98
Malacostraca	Decapoda	Brachyura	Dotillidae	Ilyoplax formosensis	24_10	MZ832066	SWIMS-CRU-20-041	Sheung Pak Nai	22.4518	113.963
Malacostraca	Decapoda	Brachyura	Dotillidae	Ilyoplax formosensis	25_10	MZ832067	SWIMS-CRU-20-042	Sheung Pak Nai	22.4518	113.963
Malacostraca	Decapoda	Brachyura	Dotillidae	Ilyoplax formosensis	6_9E	MZ832065	MZUF 5069	Tsim Bei Tsui	22.4878	113.998
Malacostraca	Decapoda	Brachyura	Dotillidae	Scopimera intermedia	17_14	MZ832147	SWIMS-CRU-20-001	Tung Chung	22.2806	113.929
Malacostraca	Decapoda	Brachyura	Dotillidae	Scopimera intermedia	18_14	MZ832148	SWIMS-CRU-20-002	Tung Chung	22.2806	113.929
Malacostraca	Decapoda	Brachyura	Dotillidae	Scopimera intermedia	ScopInt	MZ832146	NA	Tung Chung	22.2806	113.929
Malacostraca	Decapoda	Brachyura	Dotillidae	Tmethypocoelis ceratophora	13_4H	MZ832155	MZUF 5070	Fung Hang	22.5282	114.222
Malacostraca	Decapoda	Brachyura	Dotillidae	Tmethypocoelis ceratophora	20_40	MZ832153	SWIMS-CRU-20-020	Sai Keng	22.4213	114.269
Malacostraca	Decapoda	Brachyura	Dotillidae	Tmethypocoelis ceratophora	34_29	MZ832154	SWIMS-CRU-20-037	To Kwa Peng	22.4287	114.334
Malacostraca	Decapoda	Brachyura	Grapsidae	Metopograpsus frontalis	1_45A	MZ832090	SWIMS-CRU-17-098	Yim Tin Tsai	22.3757	114.301
Malacostraca	Decapoda	Brachyura	Grapsidae	Metopograpsus frontalis	12_28	MZ832092	SWIMS-CRU-17-076	Tai Tan	22.439	114.333
Malacostraca	Decapoda	Brachyura	Grapsidae	Metopograpsus frontalis	7_49	MZ832091	MZUF 5071	Yung Shue O	22.4258	114.287
Malacostraca	Decapoda	Brachyura	Grapsidae	Metopograpsus frontalis	HK2	MT265078	SWIMS-CRU-16-086	Yung Shue O	22.4258	114.287
Malacostraca	Decapoda	Brachyura	Grapsidae	Metopograpsus quadridentatus	07_11B	MZ832093	SWIMS-CRU-17-071	Ha Pak Nai (landfill)	22.4251	113.939
Malacostraca	Decapoda	Brachyura	Grapsidae	Metopograpsus quadridentatus	13_22T	MZ832094	SWIMS-CRU-16-079	Tai Tam	22.2458	114.223
Malacostraca	Decapoda	Brachyura	Leucosiidae	Philyra malefactrix	0005_11A	MZ832139	MZUF 5072	Ha Pak Nai	22.4395	113.947
Malacostraca	Decapoda	Brachyura	Leucosiidae	Philyra malefactrix	11_11A	MZ832140	SWIMS-CRU-20-044	Ha Pak Nai	22.4395	113.947
Malacostraca	Decapoda	Brachyura	Macrophthalmidae	Ilyograpsus paludicola	26_10	MZ832064	SWIMS-CRU-21-01	Sheung Pak Nai	22.4518	113.963
Malacostraca	Decapoda	Brachyura	Macrophthalmidae	Macrophthalmus convexus	18_36	MZ832071	SWIMS-CRU-17-105	Che Keng Tuk	22.372	114.264
Malacostraca	Decapoda	Brachyura	Macrophthalmidae	Macrophthalmus convexus	23_29	MZ832072	MZUF 5073	To Kwa Peng	22.4287	114.334
Malacostraca	Decapoda	Brachyura	Macrophthalmidae	Macrophthalmus convexus	39_29	MZ832073	SWIMS-CRU-20-038	To Kwa Peng	22.4287	114.334
Malacostraca	Decapoda	Brachyura	Macrophthalmidae	Macrophthalmus definitus	2_11b	MZ832074	SWIMS-CRU-17-072	Ha Pak Nai (landfill)	22.4251	113.939
Malacostraca	Decapoda	Brachyura	Macrophthalmidae	Macrophthalmus definitus	4_36	MZ832075	SWIMS-CRU-17-104	Che Keng Tuk	22.372	114.264
Malacostraca	Decapoda	Brachyura	Macrophthalmidae	Macrophthalmus erato	NA	NA	SWIMS-CRU-20-046	Tung Chung	22.2806	113.929
Malacostraca	Decapoda	Brachyura	Macrophthalmidae	Macrophthalmus erato	NA	NA	SWIMS-CRU-17-115	Ha Pak Nai	22.4395	113.947
Malacostraca	Decapoda	Brachyura	Macrophthalmidae	Macrophthalmus pacificus	15_38A	MZ832078	SWIMS-CRU-20-024	Ho Chung	22.3535	114.255
Malacostraca	Decapoda	Brachyura	Macrophthalmidae	Macrophthalmus pacificus	16_38A	MZ832079	SWIMS-CRU-20-025	Ho Chung	22.3535	114.255
Malacostraca	Decapoda	Brachyura	Macrophthalmidae	Macrophthalmus pacificus	2_22	MZ832077	SWIMS-CRU-17-091	Tai Tam	22.2458	114.223
Malacostraca	Decapoda	Brachyura	Macrophthalmidae	Macrophthalmus tomentosus	2_3B	MZ832080	SWIMS-CRU-17-109	Kai Kuk Shue Ha	22.5263	114.22
Malacostraca	Decapoda	Brachyura	Macrophthalmidae	Macrophthalmus tomentosus	21_14	MZ832081	SWIMS-CRU-20-003	Tung Chung	22.2806	113.929
Malacostraca	Decapoda	Brachyura	Macrophthalmidae	Venitus latreillei	33_14	MZ832076	SWIMS-CRU-20-016	Tung Chung	22.2806	113.929
Malacostraca	Decapoda	Brachyura	Myctiridae	Mictyris brevidactylus	19_20	MZ832095	SWIMS-CRU-20-009	Pui O	22.2403	113.98
Malacostraca	Decapoda	Brachyura	Myctiridae	Mictyris brevidactylus	20_20	MZ832096	SWIMS-CRU-20-010	Pui O	22.2403	113.98
Malacostraca	Decapoda	Brachyura	Myctiridae	Mictyris brevidactylus	HK15	MZ832097	NA	Starfish Bay	22.431	114.246
Malacostraca	Decapoda	Brachyura	Ocypodidae	Austruca lactea	05_48	MZ832025	SWIMS-CRU-20-004	Starfish Bay	22.431	114.246
Malacostraca	Decapoda	Brachyura	Ocypodidae	Austruca lactea	1_22T	MZ832024	SWIMS-CRU-16-078	Tai Tam	22.2458	114.223
Malacostraca	Decapoda	Brachyura	Ocypodidae	Austruca lactea	HK20	MT265074	MZUF 5074	Tai Tam	22.2458	114.223
Malacostraca	Decapoda	Brachyura	Ocypodidae	Gelasimus borealis	02_24	MZ832052	SWIMS-CRU-20-030	Ting Kok	22.473	114.214
Malacostraca	Decapoda	Brachyura	Ocypodidae	Gelasimus borealis	35_14	MZ832053	SWIMS-CRU-20-036	Tung Chung	22.2806	113.929
Malacostraca	Decapoda	Brachyura	Ocypodidae	Gelasimus borealis	HK18	MT265076	MZUF 5077	Starfish Bay	22.431	114.246
Malacostraca	Decapoda	Brachyura	Ocypodidae	Gelasimus borealis	HK19	MZ832054	MZUF 5075	Starfish Bay	22.431	114.246
Malacostraca	Decapoda	Brachyura	Ocypodidae	Gelasimus borealis	HK26	MZ832055	MZUF 5076	Starfish Bay	22.431	114.246
Malacostraca	Decapoda	Brachyura	Ocypodidae	Ocypode ceratophthalmus	9_26	MZ832108	SWIMS-CRU-17-112	Hoi Ha	22.4611	114.327
Malacostraca	Decapoda	Brachyura	Ocypodidae	Ocypode ceratophthalmus	HK11	MZ832109	SWIMS-CRU-XX-326	Tung Chung	22.2806	113.929
Malacostraca	Decapoda	Brachyura	Ocypodidae	Ocypode sinensis	25_19	MZ832110	SWIMS-CRU-20-032	Shui Hau	22.2192	113.919
Malacostraca	Decapoda	Brachyura	Ocypodidae	Paraleptuca splendida	1_4C	MZ832121	SWIMS-CRU-17-106	Kuk Po	22.5449	114.254
Malacostraca	Decapoda	Brachyura	Ocypodidae	Paraleptuca splendida	12_38B	MZ832122	SWIMS-CRU-17-103	Ho Chung	22.3544	114.252
Malacostraca	Decapoda	Brachyura	Ocypodidae	Tubuca acuta	0003_36	MZ832156	MZUF 5078	Che Keng Tuk	22.372	114.264
Malacostraca	Decapoda	Brachyura	Ocypodidae	Tubuca acuta	0005_11B	MZ832157	SWIMS-CRU-17-073	Ha Pak Nai (landfill)	22.4251	113.939
Malacostraca	Decapoda	Brachyura	Ocypodidae	Tubuca acuta	36_14	MZ832158	SWIMS-CRU-20-040	Tung Chung	22.2806	113.929
Malacostraca	Decapoda	Brachyura	Ocypodidae	Tubuca arcuata	12_17B	MZ832161	SWIMS-CRU-17-099	Hang Mei (Tai O)	22.2522	113.868
Malacostraca	Decapoda	Brachyura	Ocypodidae	Tubuca arcuata	2_1A	MZ832159	SWIMS-CRU-17-089	Sha Tau Kok	22.5338	114.209
Malacostraca	Decapoda	Brachyura	Ocypodidae	Tubuca arcuata	3_19	MZ832160	SWIMS-CRU-17-083	Shui Hau	22.2192	113.919
Malacostraca	Decapoda	Brachyura	Ocypodidae	Tubuca paradussumieri	0001_11B	MZ832162	SWIMS-CRU-17-074	Ha Pak Nai (landfill)	22.4251	113.939
Malacostraca	Decapoda	Brachyura	Ocypodidae	Tubuca paradussumieri	3_14T	MZ832163	SWIMS-CRU-17-070	Tung Chung	22.2806	113.929
Malacostraca	Decapoda	Brachyura	Oziidae	Epixanthus frontalis	42_49T	MZ832047	SWIMS-CRU-16-090	Yung Shue O	22.4258	114.287
Malacostraca	Decapoda	Brachyura	Pilumnidae	Heteropilumnus sasekumari	002_34	MZ832063	SWIMS-CRU-17-094	Wong Chuk Wan	22.3953	114.285
Malacostraca	Decapoda	Brachyura	Portunidae	Scylla paramamosain	16_06	MZ832149	SWIMS-CRU-20-014	Mai Po	22.4914	114.03
Malacostraca	Decapoda	Brachyura	Portunidae	Scylla serrata	21_20	MZ832150	SWIMS-CRU-20-011	Pui O	22.2403	113.98
Malacostraca	Decapoda	Brachyura	Portunidae	Thranita crenata	0002_40	MZ832151	SWIMS-CRU-17-111	Sai Keng	22.4213	114.269
Malacostraca	Decapoda	Brachyura	Portunidae	Thranita crenata	0007_22	MZ832152	SWIMS-CRU-17-092	Tai Tam	22.2458	114.223
Malacostraca	Decapoda	Brachyura	Sesarmidae	Chiromantes haematocheir	0_40T	MZ832029	SWIMS-CRU-15-002	Sai Keng	22.4213	114.269
Malacostraca	Decapoda	Brachyura	Sesarmidae	Chiromantes haematocheir	17_29	MZ832032	MZUF 5079	To Kwa Peng	22.4287	114.334
Malacostraca	Decapoda	Brachyura	Sesarmidae	Chiromantes haematocheir	36_29	MZ832033	SWIMS-CRU-20-018	To Kwa Peng	22.4287	114.334
Malacostraca	Decapoda	Brachyura	Sesarmidae	Chiromantes haematocheir	37_29	MZ832034	SWIMS-CRU-20-019	To Kwa Peng	22.4287	114.334
Malacostraca	Decapoda	Brachyura	Sesarmidae	Chiromantes haematocheir	9_28	MZ832030	SWIMS-CRU-17-119	Tai Tan	22.439	114.333
Malacostraca	Decapoda	Brachyura	Sesarmidae	Chiromantes haematocheir	9_29	MZ832031	MZUF 5080	To Kwa Peng	22.4287	114.334
Malacostraca	Decapoda	Brachyura	Sesarmidae	Chiromantes haematocheir	HK10	MT265075	SWIMS-CRU-15-003	Sai Keng	22.4213	114.269
Malacostraca	Decapoda	Brachyura	Sesarmidae	Clistocoeloma cf. merguiense	1_28	MZ832036	SWIMS-CRU-17-077	Tai Tan	22.439	114.333
Malacostraca	Decapoda	Brachyura	Sesarmidae	Clistocoeloma cf. merguiense	1_4F	MZ832035	SWIMS-CRU-17-107	Fung Hang	22.5286	114.226
Malacostraca	Decapoda	Brachyura	Sesarmidae	Clistocoeloma cf. merguiense	4_48	MZ832037	NA	Starfish Bay	22.431	114.246
Malacostraca	Decapoda	Brachyura	Sesarmidae	Clistocoeloma cf. merguiense	5_4B	MZ832038	SWIMS-CRU-17-087	So Lo Pun	22.538	114.256
Malacostraca	Decapoda	Brachyura	Sesarmidae	Clistocoeloma villosum	0005_4F	MZ832039	ZRC_pending	Fung Hang	22.5302	114.227
Malacostraca	Decapoda	Brachyura	Sesarmidae	Clistocoeloma villosum	38_29	MZ832040	SWIMS-CRU-20-039	To Kwa Peng	22.4287	114.334
Malacostraca	Decapoda	Brachyura	Sesarmidae	Episesarma versicolor	17_117	MZ832045	SWIMS-CRU-17-117	Tung Chung	22.2806	113.929
Malacostraca	Decapoda	Brachyura	Sesarmidae	Episesarma versicolor	17_118	MZ832046	SWIMS-CRU-17-118	Tung Chung	22.2806	113.929
Malacostraca	Decapoda	Brachyura	Sesarmidae	Episesarma versicolor	22_10	NA	SWIMS-CRU-18-025	Sheung Pak Nai	22.4518	113.963
Malacostraca	Decapoda	Brachyura	Sesarmidae	Episesarma versicolor	37_14	MZ832044	SWIMS-CRU-20-047	Tung Chung	22.2806	113.929
Malacostraca	Decapoda	Brachyura	Sesarmidae	Episesarma versicolor	Epivers	MZ832043	MZUF 5082	Tung Chung	22.2806	113.929
Malacostraca	Decapoda	Brachyura	Sesarmidae	Episesarma versicolor	HK10	MZ832042	MZUF 5083	Tung Chung	22.2806	113.929
Malacostraca	Decapoda	Brachyura	Sesarmidae	Fasciarma fasciatum	05_33	MZ832048	SWIMS-CRU-20-034	Pak Tam Chung	22.3979	114.322
Malacostraca	Decapoda	Brachyura	Sesarmidae	Fasciarma fasciatum	HK3	MZ832049	SWIMS-CRU-15-004	Sai Keng	22.4213	114.269
Malacostraca	Decapoda	Brachyura	Sesarmidae	Haberma tingkok	HK30	MZ832056	MZUF 5085	Ting Kok	22.473	114.214
Malacostraca	Decapoda	Brachyura	Sesarmidae	Haberma tingkok	HK31	MZ832057	MZUF 5084	Ting Kok	22.473	114.214
Malacostraca	Decapoda	Brachyura	Sesarmidae	Nanosesarma minutum	0011_47	MZ832098	SWIMS-CRU-17-102	Starfish Bay	22.431	114.246
Malacostraca	Decapoda	Brachyura	Sesarmidae	Nanosesarma minutum	29_14	MZ832099	SWIMS-CRU-20-012	Tung Chung	22.2806	113.929
Malacostraca	Decapoda	Brachyura	Sesarmidae	Nanosesarma minutum	30_14	MZ832100	SWIMS-CRU-20-013	Tung Chung	22.2806	113.929
Malacostraca	Decapoda	Brachyura	Sesarmidae	Nanosesarma pontianacense	1_9E	MZ832101	MZUF 5086	Tsim Bei Tsui	22.4878	113.998
Malacostraca	Decapoda	Brachyura	Sesarmidae	Nanosesarma pontianacense	5_50	MZ832102	SWIMS-CRU-20-017	Lau Fau Shan	22.4692	113.983
Malacostraca	Decapoda	Brachyura	Sesarmidae	Neosarmatium indicum	0011_28	MZ832103	SWIMS-CRU-17-078	Tai Tan	22.439	114.333
Malacostraca	Decapoda	Brachyura	Sesarmidae	Neosarmatium indicum	0018_4A	MZ832105	SWIMS-CRU-17-079	Lai Chi Wo	22.5261	114.262
Malacostraca	Decapoda	Brachyura	Sesarmidae	Neosarmatium indicum	13_29	MZ832104	MZUF 5088	To Kwa Peng	22.4287	114.334
Malacostraca	Decapoda	Brachyura	Sesarmidae	Neosarmatium indicum	HK25	MZ832106	MZUF 5087	Ting Kok	22.473	114.214
Malacostraca	Decapoda	Brachyura	Sesarmidae	Neosarmatium indicum	HK32	MZ832107	SWIMS-CRU-16-080	Ting Kok	22.473	114.214
Malacostraca	Decapoda	Brachyura	Sesarmidae	Orisarma dehaani	0002_06	MZ832111	MZUF 5089	Mai Po	22.4914	114.03
Malacostraca	Decapoda	Brachyura	Sesarmidae	Orisarma dehaani	001_06	MZ832112	SWIMS-CRU-17-067	Mai Po	22.4914	114.03
Malacostraca	Decapoda	Brachyura	Sesarmidae	Orisarma dehaani	003_06	MZ832113	MZUF 5090	Mai Po	22.4914	114.03
Malacostraca	Decapoda	Brachyura	Sesarmidae	Orisarma dehaani	22_40	MZ832114	SWIMS-CRU-20-043	Sai Keng	22.4213	114.269
Malacostraca	Decapoda	Brachyura	Sesarmidae	Orisarma intermedium	0001_4d	MZ832115	SWIMS-CRU-17-101	Yung Shue Au	22.5445	114.247
Malacostraca	Decapoda	Brachyura	Sesarmidae	Orisarma intermedium	2_1B	MZ832116	SWIMS-CRU-17-090	Nam Chung	22.5257	114.208
Malacostraca	Decapoda	Brachyura	Sesarmidae	Orisarma intermedium	20_29F	MZ832117	SWIMS-CRU-17-096	To Kwa Peng	22.4287	114.334
Malacostraca	Decapoda	Brachyura	Sesarmidae	Orisarma neglectum	0004_6	MZ832118	SWIMS-CRU-17-068	Mai Po	22.4914	114.03
Malacostraca	Decapoda	Brachyura	Sesarmidae	Orisarma patshuni	13_19	MZ832120	SWIMS-CRU-17-086	Shui Hau	22.2192	113.919
Malacostraca	Decapoda	Brachyura	Sesarmidae	Orisarma patshuni	8_29	MZ832119	SWIMS-CRU-17-095	To Kwa Peng	22.4287	114.334
Malacostraca	Decapoda	Brachyura	Sesarmidae	Parasesarma affine	003_2	MZ832123	SWIMS-CRU-17-110	Nam Chung	22.5295	114.207
Malacostraca	Decapoda	Brachyura	Sesarmidae	Parasesarma affine	006_11B	MZ832125	SWIMS-CRU-17-075	Ha Pak Nai (landfill)	22.4251	113.939
Malacostraca	Decapoda	Brachyura	Sesarmidae	Parasesarma affine	4_6T	MZ832124	MZUF 5091	Mai Po	22.4914	114.03
Malacostraca	Decapoda	Brachyura	Sesarmidae	Parasesarma bidens	0029_4A	MZ832129	SWIMS-CRU-17-080	Lai Chi Wo	22.5261	114.262
Malacostraca	Decapoda	Brachyura	Sesarmidae	Parasesarma bidens	004_17A	MZ832130	SWIMS-CRU-17-081	Tai O	22.2491	113.863
Malacostraca	Decapoda	Brachyura	Sesarmidae	Parasesarma bidens	12_11A	MZ832128	SWIMS-CRU-20-045	Ha Pak Nai	22.4395	113.947
Malacostraca	Decapoda	Brachyura	Sesarmidae	Parasesarma bidens	3_4D	MZ832126	SWIMS-CRU-17-100	Yung Shue Au	22.5445	114.247
Malacostraca	Decapoda	Brachyura	Sesarmidae	Parasesarma bidens	8_14T	MZ832127	SWIMS-CRU-XX-327	Tung Chung	22.2806	113.929
Malacostraca	Decapoda	Brachyura	Sesarmidae	Parasesarma pictum	08_3B	MZ832132	SWIMS-CRU-20-023	Kai Kuk Shue Ha	22.5263	114.22
Malacostraca	Decapoda	Brachyura	Sesarmidae	Parasesarma pictum	28_4A	MZ832133	SWIMS-CRU-18-023	Lai Chi Wo	22.5261	114.262
Malacostraca	Decapoda	Brachyura	Sesarmidae	Parasesarma pictum	5_45A	MZ832131	MZUF 5092	Yim Tin Tsai	22.3757	114.301
Malacostraca	Decapoda	Brachyura	Sesarmidae	Parasesarma tripectinis	23_40	MZ832135	SWIMS-CRU-20-021	Sai Keng	22.4213	114.269
Malacostraca	Decapoda	Brachyura	Sesarmidae	Parasesarma tripectinis	6_4B	MZ832134	SWIMS-CRU-17-088	So Lo Pun	22.538	114.256
Malacostraca	Decapoda	Brachyura	Sesarmidae	Parasesarma ungulatum	0010_19	MZ832136	SWIMS-CRU-17-084	Shui Hau	22.2192	113.919
Malacostraca	Decapoda	Brachyura	Sesarmidae	Parasesarma ungulatum	0011_19	MZ832137	SWIMS-CRU-17-085	Shui Hau	22.2192	113.919
Malacostraca	Decapoda	Brachyura	Sesarmidae	Parasesarma ungulatum	9_4C	MZ832138	SWIMS-CRU-17-108	Kuk Po	22.5449	114.254
Malacostraca	Decapoda	Brachyura	Sesarmidae	Sarmatium germaini	01_24	MZ832141	SWIMS-CRU-20-031	Ting Kok	22.473	114.214
Malacostraca	Decapoda	Brachyura	Sesarmidae	Sarmatium germaini	HK22	MZ832142	SWIMS-CRU-16-082 OR 083	Ting Kok	22.473	114.214
Malacostraca	Decapoda	Brachyura	Sesarmidae	Sarmatium germaini	HK27	MZ832143	SWIMS-CRU-16-082 OR 083	Ting Kok	22.473	114.214
Malacostraca	Decapoda	Brachyura	Sesarmidae	Sarmatium striaticarpus	000_49T	MZ832145	SWIMS-CRU-16-075	Yung Shue O	22.4258	114.287
Malacostraca	Decapoda	Brachyura	Sesarmidae	Sarmatium striaticarpus	02_33	MZ832144	SWIMS-CRU-18-024	Pak Tam Chung	22.3979	114.322
Malacostraca	Decapoda	Brachyura	Sesarmidae	Sinosesarma tangi	NA	LC500767	NCHUZOOL15745	Mai Po	22.4914	114.03
Malacostraca	Decapoda	Brachyura	Varunidae	Chasmagnathus convexus	03_24T	MZ832028	SWIMS-CRU-16-084	Ting Kok	22.473	114.214
Malacostraca	Decapoda	Brachyura	Varunidae	Chasmagnathus convexus	2_33T	MZ832026	SWIMS-CRU-17-069	Pak Tam Chung	22.3979	114.322
Malacostraca	Decapoda	Brachyura	Varunidae	Chasmagnathus convexus	CHA.CONV	MZ832027	MZUF 5093	Ting Kok	22.473	114.214
Malacostraca	Decapoda	Brachyura	Varunidae	Gaetice depressus	08_48	MZ832050	SWIMS-CRU-20-027	Starfish Bay	22.431	114.246
Malacostraca	Decapoda	Brachyura	Varunidae	Gaetice depressus	09_48	MZ832051	SWIMS-CRU-20-028	Starfish Bay	22.431	114.246
Malacostraca	Decapoda	Brachyura	Varunidae	Helicana doerjesi	01_48	MZ832058	SWIMS-CRU-17-116	Starfish Bay	22.431	114.246
Malacostraca	Decapoda	Brachyura	Varunidae	Helice latimera	15_06	MZ832059	SWIMS-CRU-20-015	Mai Po	22.4914	114.03
Malacostraca	Decapoda	Brachyura	Varunidae	Helice latimera	29_19	MZ832060	SWIMS-CRU-20-033	Shui Hau	22.2192	113.919
Malacostraca	Decapoda	Brachyura	Varunidae	Hemigrapsus penicillatus	07_48	MZ832061	SWIMS-CRU-20-035	Starfish Bay	22.431	114.246
Malacostraca	Decapoda	Brachyura	Varunidae	Hemigrapsus penicillatus	14_34	MZ832062	SWIMS-CRU-17-120	Wong Chuk Wan	22.3953	114.285
Malacostraca	Decapoda	Brachyura	Varunidae	Metaplax longipes	12_14	MZ832082	SWIMS-CRU-20-005	Tung Chung	22.2806	113.929
Malacostraca	Decapoda	Brachyura	Varunidae	Metaplax longipes	13_14	MZ832083	SWIMS-CRU-20-006	Tung Chung	22.2806	113.929
Malacostraca	Decapoda	Brachyura	Varunidae	Metaplax tredecim	2_49T	MZ832084	SWIMS-CRU-16-076	Yung Shue O	22.4258	114.287
Malacostraca	Decapoda	Brachyura	Varunidae	Metaplax tredecim	4_40T	MZ832085	SWIMS-CRU-15-005	Sai Keng	22.4213	114.269
Malacostraca	Decapoda	Brachyura	Varunidae	Metaplax tredecim	9_49T	MZ832087	SWIMS-CRU-16-077	Yung Shue O	22.4258	114.287
Malacostraca	Decapoda	Brachyura	Varunidae	Metaplax tredecim	HK28	MT265077	SWIMS-CRU-16-081	Yung Shue O	22.4258	114.287
Malacostraca	Decapoda	Brachyura	Varunidae	Metaplax tredecim	HK29	MZ832089	MZUF 5094	Yung Shue O	22.4258	114.287
Malacostraca	Decapoda	Brachyura	Varunidae	Metaplax tredecim	HK5	MZ832088	NA	Yung Shue O	22.4258	114.287
Malacostraca	Decapoda	Brachyura	Varunidae	Metaplax tredecim	HK7	MZ832086	MZUF 5095	Yung Shue O	22.4258	114.287
Malacostraca	Decapoda	Brachyura	Varunidae	Varuna yui	0003_38B	MZ832164	SWIMS-CRU-17-097	Ho Chung	22.3544	114.252
Malacostraca	Decapoda	Brachyura	Varunidae	Varuna yui	19_40	MZ832165	SWIMS-CRU-20-022	Sai Keng	22.4213	114.269
Malacostraca	Decapoda	Brachyura	Xanthidae	Leptodius affinis	1_17A	MZ832068	SWIMS-CRU-17-082	Tai O	22.2491	113.863
Malacostraca	Decapoda	Brachyura	Xanthidae	Leptodius affinis	11_48	MZ832069	SWIMS-CRU-20-029	Starfish Bay	22.431	114.246
Malacostraca	Decapoda	Brachyura	Xanthidae	Leptodius affinis	6_22	MZ832070	SWIMS-CRU-17-093	Tai Tam	22.2458	114.223
Gastropoda	Littorinimorpha		Assimineidae	Optediceros breviculum	2019_112	MZ831963	SWIMS-MOL-18-069	Hang Mei (Tai O)	22.2522	113.868
Gastropoda	Littorinimorpha		Assimineidae	Optediceros breviculum	2020_65	MZ831964	SWIMS-MOL-20-023	Sheung Pak Nai	22.4518	113.963
Gastropoda	Littorinimorpha		Assimineidae	Optediceros breviculum	2020_67	MZ831965	SWIMS-MOL-20-024	Ha Pak Nai	22.4395	113.947
Gastropoda	Caenogastropoda		Batillariidae	Batillaria attramentaria	2019_101.139	MZ831897	SWIMS-MOL-18-114	Tung Chung	22.2806	113.929
Gastropoda	Caenogastropoda		Batillariidae	Batillaria attramentaria	2019_97.135	MZ831899	SWIMS-MOL-18-113	Tung Chung	22.2806	113.929
Gastropoda	Caenogastropoda		Batillariidae	Batillaria attramentaria	2020_31	MZ831898	SWIMS-MOL-20-007	Tung Chung	22.2806	113.929
Gastropoda	Caenogastropoda		Batillariidae	Batillaria cumingii	2020_23	MZ831900	SWIMS-MOL-20-008	Pui O	22.2403	113.98
Gastropoda	Caenogastropoda		Batillariidae	Batillaria zonalis	2020_41	MZ831901	SWIMS-MOL-20-011	Sai Keng	22.4213	114.269
Gastropoda	Caenogastropoda		Batillariidae	Batillaria zonalis	2020_49	MZ831902	SWIMS-MOL-20-016	Starfish Bay	22.431	114.246
Gastropoda	Caenogastropoda		Cerithiidae	Cerithium coralium	2019_147.185	MZ831909	SWIMS-MOL-18-115	To Kwa Peng	22.4287	114.334
Gastropoda	Caenogastropoda		Cerithiidae	Cerithium coralium	2019_167.205	MZ831910	SWIMS-MOL-18-116	To Kwa Peng	22.4287	114.334
Gastropoda	Caenogastropoda		Cerithiidae	Clypeomorus sp.	2019_127.165	MZ831920	SWIMS-MOL-18-118	To Kwa Peng	22.4287	114.334
Gastropoda	Caenogastropoda		Cerithiidae	Clypeomorus sp.	2019_79.118	MZ831922	SWIMS-MOL-18-117	To Kwa Peng	22.4287	114.334
Gastropoda	Caenogastropoda		Cerithiidae	Clypeomorus sp.	2020_48	MZ831921	SWIMS-MOL-20-015	Sai Keng	22.4213	114.269
Gastropoda	Ellobiida		Ellobiidae	Cassidula aurisfelis	2020_77	MZ831903	SWIMS-MOL-20-033	Sai Keng	22.4213	114.269	x
Gastropoda	Ellobiida		Ellobiidae	Cassidula aurisfelis	Ca3_43	MZ831904	SWIMS-MOL-17-158	Sham Chung	22.4424	114.284	x
Gastropoda	Ellobiida		Ellobiidae	Cassidula plecotrematoides	2020_55	MZ831905	SWIMS-MOL-20-017	Pak Tam Chung	22.3979	114.322	x
Gastropoda	Ellobiida		Ellobiidae	Ellobium sp.	2019_72.112	MZ831924	SWIMS-MOL-18-053	Sheung Pak Nai	22.4518	113.963	x
Gastropoda	Ellobiida		Ellobiidae	Ellobium sp.	2019_74.114	MZ831925	SWIMS-MOL-18-054	Sheung Pak Nai	22.4518	113.963	x
Gastropoda	Ellobiida		Ellobiidae	Ellobium sp.	2020_66	MZ831923	SWIMS-MOL-20-025	Sheung Pak Nai	22.4518	113.963	x
Gastropoda	Ellobiida		Ellobiidae	Ellobium chinense	2019_109	MZ831926	SWIMS-MOL-18-061	Lai Chi Wo	22.5261	114.262	x
Gastropoda	Ellobiida		Ellobiidae	Laemodonta punctatostriata	2019_82.121	MZ831928	SWIMS-MOL-18-107	Sheung Pak Nai	22.4518	113.963	x
Gastropoda	Ellobiida		Ellobiidae	Laemodonta punctatostriata	2020_63	MZ831927	SWIMS-MOL-20-026	Sheung Pak Nai	22.4518	113.963	x
Gastropoda	Ellobiida		Ellobiidae	Phythia sp.	2019_77.116	MZ831968	SWIMS-MOL-18-123	To Kwa Peng	22.4287	114.334	x
Gastropoda	Cephalaspidea		Haminoeidae	Bakawan puti	2019_106	MZ831896	SWIMS-MOL-18-060	Hang Mei (Tai O)	22.2522	113.868
Gastropoda	Littorinimorpha		Littorinidae	Littoraria ardouiniana	2019_31.73	MZ831938	SWIMS-MOL-18-056	Tung Chung	22.2806	113.929
Gastropoda	Littorinimorpha		Littorinidae	Littoraria ardouiniana	2019_32.74	MZ831939	SWIMS-MOL-18-112	Hang Mei (Tai O)	22.2522	113.868
Gastropoda	Littorinimorpha		Littorinidae	Littoraria ardouiniana	2019_54.95	MZ831940	SWIMS-MOL-18-063	Sheung Pak Nai	22.4518	113.963
Gastropoda	Littorinimorpha		Littorinidae	Littoraria articulata	2019_102.140	MZ831942	SWIMS-MOL-18-058	Tung Chung	22.2806	113.929
Gastropoda	Littorinimorpha		Littorinidae	Littoraria articulata	2019_38.80	MZ831941	SWIMS-MOL-18-064	Ha Pak Nai	22.4395	113.947
Gastropoda	Littorinimorpha		Littorinidae	Littoraria articulata	2019_46.18	MZ831943	SWIMS-MOL-18-057	Tung Chung	22.2806	113.929
Gastropoda	Littorinimorpha		Littorinidae	Littoraria melanostoma	2019_37.79	MZ831944	SWIMS-MOL-18-059	Tung Chung	22.2806	113.929
Gastropoda	Littorinimorpha		Littorinidae	Littoraria sinensis	2019_40.82	MZ831945	SWIMS-MOL-18-065	Ha Pak Nai	22.4395	113.947
Gastropoda	Neogastropoda		Nassariidae	Nassarius sinarum	TC12	MZ831950	SWIMS-MOL-19-009	Tung Chung	22.2806	113.929
Gastropoda	Neogastropoda		Nassariidae	Reticunassa festiva	2020_51	MZ832010	SWIMS-MOL-20-018	Starfish Bay	22.431	114.246
Gastropoda	Cycloneritida		Neritidae	Clithon oualaniense	2019_4.17	MZ831914	SWIMS-MOL-17-159	Sam A Tsuen	22.5156	114.272
Gastropoda	Cycloneritida		Neritidae	Clithon oualaniense	2020_33	MZ831911	SWIMS-MOL-20-009	Tung Chung	22.2806	113.929
Gastropoda	Cycloneritida		Neritidae	Clithon oualaniense	2020_34	MZ831912	SWIMS-MOL-20-010	Tung Chung	22.2806	113.929
Gastropoda	Cycloneritida		Neritidae	Clithon oualaniense	2020_60	MZ831913	SWIMS-MOL-20-022	Tung Chung	22.2806	113.929
Gastropoda	Cycloneritida		Neritidae	Clithon sowerbianum	2019_1.19	MZ831915	SWIMS-MOL-17-160	Sam A Tsuen	22.5156	114.272
Gastropoda	Cycloneritida		Neritidae	Clithon sowerbianum	2019_2.20	MZ831916	SWIMS-MOL-17-163	Lai Chi Chong	22.4545	114.301
Gastropoda	Cycloneritida		Neritidae	Clithon sowerbianum	Cl2_14	MZ831917	SWIMS-MOL-17-157	Tung Chung	22.2806	113.929
Gastropoda	Cycloneritida		Neritidae	Clithon sowerbianum	HK07	MZ831918	SWIMS-MOL-17-161	Sam A Chung	22.5076	114.273
Gastropoda	Cycloneritida		Neritidae	Clithon sowerbianum	HK08	MZ831919	SWIMS-MOL-17-162	Sam A Chung	22.5076	114.273
Gastropoda	Cycloneritida		Neritidae	Neripteron cornucopia	2019_156.94	MZ831951	SWIMS-MOL-18-097	So Lo Pun	22.538	114.256
Gastropoda	Cycloneritida		Neritidae	Neripteron violaceum	2019_162	MZ831952	SWIMS-MOL-18-055	Sheung Pak Nai	22.4518	113.963
Gastropoda	Cycloneritida		Neritidae	Neripteron violaceum	2019_59.100	MZ831953	SWIMS-MOL-18-106	Tsim Bei Tsui	22.4878	113.998
Gastropoda	Cycloneritida		Neritidae	Nerita balteata	2019_107	MZ831954	SWIMS-MOL-18-066	Sheung Pak Nai	22.4518	113.963
Gastropoda	Cycloneritida		Neritidae	Nerita planospira	2019_56.97	MZ831955	SWIMS-MOL-18-062	To Kwa Peng	22.4287	114.334
Gastropoda	Cycloneritida		Neritidae	Nerita yoldii	2020_24	MZ831956	SWIMS-MOL-20-005	Tung Chung	22.2806	113.929
Gastropoda	Cycloneritida		Neritidae	Nerita yoldii	2020_26	MZ831957	SWIMS-MOL-20-006	Tung Chung	22.2806	113.929
Gastropoda	Cycloneritida		Neritidae	Nerita yoldii	TC05	MZ831958	SWIMS-MOL-19-010	Tung Chung	22.2806	113.929
Gastropoda	Cycloneritida		Neritidae	Nerita yoldii	TC06	MZ831959	SWIMS-MOL-19-011	Tung Chung	22.2806	113.929
Gastropoda	Cycloneritida		Neritidae	Nerita yoldii	TC07	MZ831960	SWIMS-MOL-19-012	Tung Chung	22.2806	113.929
Gastropoda	Cycloneritida		Neritidae	Nerita yoldii	TC08	MZ831961	SWIMS-MOL-19-013	Tung Chung	22.2806	113.929
Gastropoda	Systellommatophora		Onchidiidae	Laspionchis boucheti	2019_100	MZ831929	NA	Sheung Pak Nai	22.4518	113.963	x
Gastropoda	Systellommatophora		Onchidiidae	Laspionchis boucheti	2019_122.160	MZ831930	SWIMS-MOL-18-110	Sheung Pak Nai	22.4518	113.963	x
Gastropoda	Systellommatophora		Onchidiidae	Laspionchis boucheti	2019_134.172	MZ831931	SWIMS-MOL-18-067	Sheung Pak Nai	22.4518	113.963	x
Gastropoda	Systellommatophora		Onchidiidae	Laspionchis boucheti	2019_135.173	MZ831932	SWIMS-MOL-18-111	Sheung Pak Nai	22.4518	113.963	x
Gastropoda	Systellommatophora		Onchidiidae	Laspionchis boucheti	2019_151.189	MZ831933	SWIMS-MOL-18-068	Sheung Pak Nai	22.4518	113.963	x
Gastropoda	Systellommatophora		Onchidiidae	Laspionchis boucheti	2019_70.110	MZ831934	SWIMS-MOL-18-108	Sheung Pak Nai	22.4518	113.963	x
Gastropoda	Systellommatophora		Onchidiidae	Laspionchis boucheti	2019_71.111	MZ831935	SWIMS-MOL-18-109	Sheung Pak Nai	22.4518	113.963	x
Gastropoda	Systellommatophora		Onchidiidae	Laspionchis boucheti	TC18	MZ831936	SWIMS-MOL-19-014	Tung Chung	22.2806	113.929	x
Gastropoda	Systellommatophora		Onchidiidae	Laspionchis boucheti	TC19	MZ831937	SWIMS-MOL-19-015	Tung Chung	22.2806	113.929	x
Gastropoda	Systellommatophora		Onchidiidae	Onchidium stuxbergi	2020_68	MZ831962	SWIMS-MOL-20-029	Fung Hang	22.5286	114.226	x
Gastropoda	Systellommatophora		Onchidiidae	Paromoionchis tumidus	2020_75	MZ831966	SWIMS-MOL-20-027	Ha Pak Nai	22.4395	113.947	x
Gastropoda	Systellommatophora		Onchidiidae	Paromoionchis tumidus	TC17	MZ831967	SWIMS-MOL-19-016	Tung Chung	22.2806	113.929	x
Gastropoda	Systellommatophora		Onchidiidae	Platevindex mortoni	2020_72	MZ832006	SWIMS-MOL-20-030	Fung Hang	22.5286	114.226	x
Gastropoda	Systellommatophora		Onchidiidae	Platevindex sp.	2020_70	MZ832007	SWIMS-MOL-20-031	Fung Hang	22.5286	114.226	x
Gastropoda	Systellommatophora		Onchidiidae	Platevindex sp.	2020_71	MZ832008	SWIMS-MOL-20-032	Fung Hang	22.5286	114.226	x
Gastropoda	Systellommatophora		Onchidiidae	Platevindex sp.	2020_76	MZ832009	SWIMS-MOL-20-028	Ha Pak Nai	22.4395	113.947	x
Gastropoda	Systellommatophora		Onchidiidae	Wallaconchis graniferus	2020_73	MZ832022	SWIMS-MOL-20-019	Hoi Ha	22.4611	114.327	x
Gastropoda	Systellommatophora		Onchidiidae	Wallaconchis graniferus	2020_74	MZ832023	SWIMS-MOL-20-020	Hoi Ha	22.4611	114.327	x
Gastropoda	Caenogastropoda		Planaxidae	Planaxis sulcatus	2020_42	MZ832004	SWIMS-MOL-20-012	Sai Keng	22.4213	114.269
Gastropoda	Caenogastropoda		Planaxidae	Planaxis sulcatus	2020_58	MZ832005	SWIMS-MOL-20-021	Hoi Ha	22.4611	114.327
Gastropoda	Caenogastropoda		Potamididae	Cerithidea tonkiniana	2019_68.108	MZ831906	SWIMS-MOL-18-072	Nam Chung	22.5295	114.207
Gastropoda	Caenogastropoda		Potamididae	Cerithidea moerchii	2019_81.120	MZ831907	SWIMS-MOL-18-070	Nam Chung	22.5295	114.207
Gastropoda	Caenogastropoda		Potamididae	Cerithidea moerchii	2019_92.131	MZ831908	SWIMS-MOL-18-071	Nam Chung	22.5295	114.207
Gastropoda	Caenogastropoda		Potamididae	Pirenella alata	2019_10.52	MZ831970	SWIMS-MOL-18-074	Nam Chung	22.5295	114.207
Gastropoda	Caenogastropoda		Potamididae	Pirenella alata	2019_12.54	MZ831971	SWIMS-MOL-18-129	To Kwa Peng	22.4287	114.334
Gastropoda	Caenogastropoda		Potamididae	Pirenella alata	2019_120	MZ831969	SWIMS-MOL-18-128	To Kwa Peng	22.4287	114.334
Gastropoda	Caenogastropoda		Potamididae	Pirenella alata	2019_13.55	MZ831972	SWIMS-MOL-18-077	Nam Chung	22.5295	114.207
Gastropoda	Caenogastropoda		Potamididae	Pirenella alata	2019_14.56	MZ831973	SWIMS-MOL-18-130	To Kwa Peng	22.4287	114.334
Gastropoda	Caenogastropoda		Potamididae	Pirenella alata	2019_15.57	MZ831974	SWIMS-MOL-18-075	Nam Chung	22.5295	114.207
Gastropoda	Caenogastropoda		Potamididae	Pirenella alata	2019_28.70	MZ831975	SWIMS-MOL-18-076	Nam Chung	22.5295	114.207
Gastropoda	Caenogastropoda		Potamididae	Pirenella alata	2019_65.105	MZ831976	SWIMS-MOL-18-078	Nam Chung	22.5295	114.207
Gastropoda	Caenogastropoda		Potamididae	Pirenella alata	2019_66.106	MZ831977	SWIMS-MOL-18-079	Nam Chung	22.5295	114.207
Gastropoda	Caenogastropoda		Potamididae	Pirenella alata	2019_9.51	MZ831978	SWIMS-MOL-18-073	Nam Chung	22.5295	114.207
Gastropoda	Caenogastropoda		Potamididae	Pirenella alata	2019_91.130	MZ831979	SWIMS-MOL-18-080	Nam Chung	22.5295	114.207
Gastropoda	Caenogastropoda		Potamididae	Pirenella alata	2019_96.134	MZ831980	SWIMS-MOL-18-081	Nam Chung	22.5295	114.207
Gastropoda	Caenogastropoda		Potamididae	Pirenella alata	HK19	MZ831981	SWIMS-MOL-18-119	To Kwa Peng	22.4287	114.334
Gastropoda	Caenogastropoda		Potamididae	Pirenella alata	HK20	MZ831982	SWIMS-MOL-18-120	To Kwa Peng	22.4287	114.334
Gastropoda	Caenogastropoda		Potamididae	Pirenella alata	HK24	MZ831983	SWIMS-MOL-18-121	To Kwa Peng	22.4287	114.334
Gastropoda	Caenogastropoda		Potamididae	Pirenella asiatica	2019_138.76	MZ831984	SWIMS-MOL-18-098	So Lo Pun	22.538	114.256
Gastropoda	Caenogastropoda		Potamididae	Pirenella asiatica	2020_2	MZ831985	SWIMS-MOL-20-001	Tung Chung	22.2806	113.929
Gastropoda	Caenogastropoda		Potamididae	Pirenella incisa	2019_159.197	MZ831986	SWIMS-MOL-18-086	Nam Chung	22.5295	114.207
Gastropoda	Caenogastropoda		Potamididae	Pirenella incisa	2019_17.59	MZ831987	SWIMS-MOL-18-082	Nam Chung	22.5295	114.207
Gastropoda	Caenogastropoda		Potamididae	Pirenella incisa	2019_20.62	MZ831988	SWIMS-MOL-18-099	So Lo Pun	22.538	114.256
Gastropoda	Caenogastropoda		Potamididae	Pirenella incisa	2019_67.107	MZ831989	SWIMS-MOL-18-083	Nam Chung	22.5295	114.207
Gastropoda	Caenogastropoda		Potamididae	Pirenella incisa	2019_69.109	MZ831990	SWIMS-MOL-18-084	Nam Chung	22.5295	114.207
Gastropoda	Caenogastropoda		Potamididae	Pirenella incisa	2019_88.127	MZ831991	SWIMS-MOL-18-085	Nam Chung	22.5295	114.207
Gastropoda	Caenogastropoda		Potamididae	Pirenella incisa	HK11	MZ831992	SWIMS-MOL-18-101	Sha Tau Kok	22.5338	114.209
Gastropoda	Caenogastropoda		Potamididae	Pirenella incisa	HK12	MZ831993	SWIMS-MOL-18-102	Sha Tau Kok	22.5338	114.209
Gastropoda	Caenogastropoda		Potamididae	Pirenella incisa	HK14	MZ831994	SWIMS-MOL-18-103	Sha Tau Kok	22.5338	114.209
Gastropoda	Caenogastropoda		Potamididae	Pirenella incisa	HK15	MZ831995	SWIMS-MOL-18-104	Sha Tau Kok	22.5338	114.209
Gastropoda	Caenogastropoda		Potamididae	Pirenella nanhaiensis	2019_144.182	MZ831996	SWIMS-MOL-18-087	Nam Chung	22.5295	114.207
Gastropoda	Caenogastropoda		Potamididae	Pirenella nanhaiensis	2019_27.69	MZ831999	SWIMS-MOL-18-122	To Kwa Peng	22.4287	114.334
Gastropoda	Caenogastropoda		Potamididae	Pirenella nanhaiensis	2020_37	MZ831997	SWIMS-MOL-20-013	Fung Hang	22.5286	114.226
Gastropoda	Caenogastropoda		Potamididae	Pirenella nanhaiensis	2020_38	MZ831998	SWIMS-MOL-20-014	Fung Hang	22.5286	114.226
Gastropoda	Caenogastropoda		Potamididae	Pirenella pupiformis	2019_24.66	MZ832000	SWIMS-MOL-18-105	Sha Tau Kok	22.5338	114.209
Gastropoda	Caenogastropoda		Potamididae	Pirenella pupiformis	2019_25.67	MZ832001	SWIMS-MOL-18-088	Nam Chung	22.5295	114.207
Gastropoda	Caenogastropoda		Potamididae	Pirenella pupiformis	HK17	MZ832002	SWIMS-MOL-18-124	To Kwa Peng	22.4287	114.334
Gastropoda	Caenogastropoda		Potamididae	Pirenella pupiformis	HK18	MZ832003	SWIMS-MOL-18-125	To Kwa Peng	22.4287	114.334
Gastropoda	Caenogastropoda		Potamididae	Terebralia sulcata	2019_117.155	MZ832012	SWIMS-MOL-18-094	Nam Chung	22.5295	114.207
Gastropoda	Caenogastropoda		Potamididae	Terebralia sulcata	2019_124.162	MZ832013	SWIMS-MOL-18-095	Nam Chung	22.5295	114.207
Gastropoda	Caenogastropoda		Potamididae	Terebralia sulcata	2019_131.169	MZ832014	SWIMS-MOL-18-096	Nam Chung	22.5295	114.207
Gastropoda	Caenogastropoda		Potamididae	Terebralia sulcata	2019_50.91	MZ832015	SWIMS-MOL-18-100	So Lo Pun	22.538	114.256
Gastropoda	Caenogastropoda		Potamididae	Terebralia sulcata	2019_51.92	MZ832016	NA	Nam Chung	22.5295	114.207
Gastropoda	Caenogastropoda		Potamididae	Terebralia sulcata	2019_52.93	MZ832017	SWIMS-MOL-18-089	Nam Chung	22.5295	114.207
Gastropoda	Caenogastropoda		Potamididae	Terebralia sulcata	2019_53.94	MZ832018	SWIMS-MOL-18-090	Nam Chung	22.5295	114.207
Gastropoda	Caenogastropoda		Potamididae	Terebralia sulcata	2019_73.113	MZ832019	SWIMS-MOL-18-091	Nam Chung	22.5295	114.207
Gastropoda	Caenogastropoda		Potamididae	Terebralia sulcata	2019_78.117	MZ832020	SWIMS-MOL-18-092	Nam Chung	22.5295	114.207
Gastropoda	Caenogastropoda		Potamididae	Terebralia sulcata	2019_80.119	MZ832011	SWIMS-MOL-18-131	Sheung Pak Nai	22.4518	113.963
Gastropoda	Caenogastropoda		Potamididae	Terebralia sulcata	2019_93.132	MZ832021	SWIMS-MOL-18-093	Nam Chung	22.5295	114.207
Gastropoda	Caenogastropoda		Thiaridae	Sermyla riqueti	NA	NA	SWIMS-MOL-18-126	Shui Hau	22.2192	113.919
Gastropoda	Caenogastropoda		Thiaridae	Sermyla riqueti	NA	NA	SWIMS-MOL-18-126	Sam A Tsuen	22.5156	114.272
Gastropoda	Trochida		Trochidae	Monodonta labio	2020_15	MZ831948	SWIMS-MOL-20-002	Tung Chung	22.2806	113.929
Gastropoda	Trochida		Trochidae	Monodonta labio	2020_16	MZ831949	SWIMS-MOL-20-003	Tung Chung	22.2806	113.929
Gastropoda	Trochida		Turbinidae	Lunella granulata	2020_19	MZ831946	SWIMS-MOL-20-004	Tung Chung	22.2806	113.929
Gastropoda	Trochida		Turbinidae	Lunella granulata	TC01	MZ831947	SWIMS-MOL-19-017	Tung Chung	22.2806	113.929

## Sheet: Foglio1
Seq1	Bakawan puti	2019_106	MZ831896
Seq2	Batillaria attramentaria	2019_101.139	MZ831897
Seq4	Batillaria attramentaria	2019_97.135	MZ831899
Seq3	Batillaria attramentaria	2020_31	MZ831898
Seq5	Batillaria cumingii	2020_23	MZ831900
Seq6	Batillaria zonalis	2020_41	MZ831901
Seq7	Batillaria zonalis	2020_49	MZ831902
Seq8	Cassidula aurisfelis	2020_77	MZ831903
Seq9	Cassidula aurisfelis	Ca3_43	MZ831904
Seq10	Cassidula plecotrematoides	2020_55	MZ831905
Seq11	Cerithidea tonkiniana	2019_68.108	MZ831906
Seq12	Cerithidea moerchii	2019_81.120	MZ831907
Seq13	Cerithidea moerchii	2019_92.131	MZ831908
Seq14	Cerithium coralium	2019_147.185	MZ831909
Seq15	Cerithium coralium	2019_167.205	MZ831910
Seq19	Clithon oualaniense	2019_4.17	MZ831914
Seq16	Clithon oualaniense	2020_33	MZ831911
Seq17	Clithon oualaniense	2020_34	MZ831912
Seq18	Clithon oualaniense	2020_60	MZ831913
Seq20	Clithon sowerbianum	2019_1.19	MZ831915
Seq21	Clithon sowerbianum	2019_2.20	MZ831916
Seq22	Clithon sowerbianum	Cl2_14	MZ831917
Seq23	Clithon sowerbianum	HK07	MZ831918
Seq24	Clithon sowerbianum	HK08	MZ831919
Seq25	Clypeomorus sp.	2019_127.165	MZ831920
Seq27	Clypeomorus sp.	2019_79.118	MZ831922
Seq26	Clypeomorus sp.	2020_48	MZ831921
Seq29	Ellobium sp.	2019_72.112	MZ831924
Seq30	Ellobium sp.	2019_74.114	MZ831925
Seq28	Ellobium sp.	2020_66	MZ831923
Seq31	Ellobium chinense	2019_109	MZ831926
Seq33	Laemodonta punctatostriata	2019_82.121	MZ831928
Seq32	Laemodonta punctatostriata	2020_63	MZ831927
Seq34	Laspionchis boucheti	2019_100	MZ831929
Seq35	Laspionchis boucheti	2019_122.160	MZ831930
Seq36	Laspionchis boucheti	2019_134.172	MZ831931
Seq37	Laspionchis boucheti	2019_135.173	MZ831932
Seq38	Laspionchis boucheti	2019_151.189	MZ831933
Seq39	Laspionchis boucheti	2019_70.110	MZ831934
Seq40	Laspionchis boucheti	2019_71.111	MZ831935
Seq41	Laspionchis boucheti	TC18	MZ831936
Seq42	Laspionchis boucheti	TC19	MZ831937
Seq43	Littoraria ardouiniana	2019_31.73	MZ831938
Seq44	Littoraria ardouiniana	2019_32.74	MZ831939
Seq45	Littoraria ardouiniana	2019_54.95	MZ831940
Seq47	Littoraria articulata	2019_102.140	MZ831942
Seq46	Littoraria articulata	2019_38.80	MZ831941
Seq48	Littoraria articulata	2019_46.18	MZ831943
Seq49	Littoraria melanostoma	2019_37.79	MZ831944
Seq50	Littoraria sinensis	2019_40.82	MZ831945
Seq51	Lunella granulata	2020_19	MZ831946
Seq52	Lunella granulata	TC01	MZ831947
Seq53	Monodonta labio	2020_15	MZ831948
Seq54	Monodonta labio	2020_16	MZ831949
Seq55	Nassarius sinarum	TC12	MZ831950
Seq56	Neripteron cornucopia	2019_156.94	MZ831951
Seq57	Neripteron violaceum	2019_162	MZ831952
Seq58	Neripteron violaceum	2019_59.100	MZ831953
Seq59	Nerita balteata	2019_107	MZ831954
Seq60	Nerita planospira	2019_56.97	MZ831955
Seq61	Nerita yoldii	2020_24	MZ831956
Seq62	Nerita yoldii	2020_26	MZ831957
Seq63	Nerita yoldii	TC05	MZ831958
Seq64	Nerita yoldii	TC06	MZ831959
Seq65	Nerita yoldii	TC07	MZ831960
Seq66	Nerita yoldii	TC08	MZ831961
Seq67	Onchidium stuxbergi	2020_68	MZ831962
Seq68	Optediceros breviculum	2019_112	MZ831963
Seq69	Optediceros breviculum	2020_65	MZ831964
Seq70	Optediceros breviculum	2020_67	MZ831965
Seq71	Paromoionchis tumidus	2020_75	MZ831966
Seq72	Paromoionchis tumidus	TC17	MZ831967
Seq73	Phythia sp.	2019_77.116	MZ831968
Seq75	Pirenella alata	2019_10.52	MZ831970
Seq76	Pirenella alata	2019_12.54	MZ831971
Seq74	Pirenella alata	2019_120	MZ831969
Seq77	Pirenella alata	2019_13.55	MZ831972
Seq78	Pirenella alata	2019_14.56	MZ831973
Seq79	Pirenella alata	2019_15.57	MZ831974
Seq80	Pirenella alata	2019_28.70	MZ831975
Seq81	Pirenella alata	2019_65.105	MZ831976
Seq82	Pirenella alata	2019_66.106	MZ831977
Seq83	Pirenella alata	2019_9.51	MZ831978
Seq84	Pirenella alata	2019_91.130	MZ831979
Seq85	Pirenella alata	2019_96.134	MZ831980
Seq86	Pirenella alata	HK19	MZ831981
Seq87	Pirenella alata	HK20	MZ831982
Seq88	Pirenella alata	HK24	MZ831983
Seq89	Pirenella asiatica	2019_138.76	MZ831984
Seq90	Pirenella asiatica	2020_2	MZ831985
Seq91	Pirenella incisa	2019_159.197	MZ831986
Seq92	Pirenella incisa	2019_17.59	MZ831987
Seq93	Pirenella incisa	2019_20.62	MZ831988
Seq94	Pirenella incisa	2019_67.107	MZ831989
Seq95	Pirenella incisa	2019_69.109	MZ831990
Seq96	Pirenella incisa	2019_88.127	MZ831991
Seq97	Pirenella incisa	HK11	MZ831992
Seq98	Pirenella incisa	HK12	MZ831993
Seq99	Pirenella incisa	HK14	MZ831994
Seq100	Pirenella incisa	HK15	MZ831995
Seq101	Pirenella nanhaiensis	2019_144.182	MZ831996
Seq104	Pirenella nanhaiensis	2019_27.69	MZ831999
Seq102	Pirenella nanhaiensis	2020_37	MZ831997
Seq103	Pirenella nanhaiensis	2020_38	MZ831998
Seq105	Pirenella pupiformis	2019_24.66	MZ832000
Seq106	Pirenella pupiformis	2019_25.67	MZ832001
Seq107	Pirenella pupiformis	HK17	MZ832002
Seq108	Pirenella pupiformis	HK18	MZ832003
Seq109	Planaxis sulcatus	2020_42	MZ832004
Seq110	Planaxis sulcatus	2020_58	MZ832005
Seq111	Platevindex mortoni	2020_72	MZ832006
Seq112	Platevindex sp.	2020_70	MZ832007
Seq113	Platevindex sp.	2020_71	MZ832008
Seq114	Platevindex sp.	2020_76	MZ832009
Seq115	Reticunassa festiva	2020_51	MZ832010
Seq117	Terebralia sulcata	2019_117.155	MZ832012
Seq118	Terebralia sulcata	2019_124.162	MZ832013
Seq119	Terebralia sulcata	2019_131.169	MZ832014
Seq120	Terebralia sulcata	2019_50.91	MZ832015
Seq121	Terebralia sulcata	2019_51.92	MZ832016
Seq122	Terebralia sulcata	2019_52.93	MZ832017
Seq123	Terebralia sulcata	2019_53.94	MZ832018
Seq124	Terebralia sulcata	2019_73.113	MZ832019
Seq125	Terebralia sulcata	2019_78.117	MZ832020
Seq116	Terebralia sulcata	2019_80.119	MZ832011
Seq126	Terebralia sulcata	2019_93.132	MZ832021
Seq127	Wallaconchis graniferus	2020_73	MZ832022
Seq128	Wallaconchis graniferus	2020_74	MZ832023
