# Supplementary material for: A DNA barcode library for mangrove gastropods and crabs of Hong Kong and the Greater Bay Area reveals an unexpected faunal diversity associated with the intertidal forests of Southern China
Source: BMC Ecol Evol. 2021 Sep 23;21:180. doi: 10.1186/s12862-021-01914-6 (PMC8459539; doi:10.1186/s12862-021-01914-6)
Supplement: Supplementary file 3 — Additional file 3. Sequence alignment of the mollusc barcode COxI regions. [file 12862_2021_1914_MOESM3_ESM.fasta]

>Seq1_[organism=Bakawan_puti]_[isolate=2019_106]
-----------------------------------------------------------------------------------------------------------------------------------------------------TTTTTTTTATAGTAATACCTTTAATGATTGGTGGATTTGGAAACTGAATAGTACCTTTATTAATTGGTGCTCCAGATATAAGTTTCCCTCGAATAAATAATATAAGTTTTTGACTTTTACCACCTTCTTTCATTTTACTTTTAGTTTCTAGTATAGTAGAGGGAGGAGCAGGTACAGGATGAACTGTTTATCCTCCATTATCAGGTCCTATTGCCCATGGATCTTGTGCTGTTGATTTAGCGATTTTCTCTCTTCACTTGGCAGGAATGTCTTCAATTTTAGGGGCTATTAATTTTATTACAACTATTATTAATATGCGGGCTCCTGGAATTACTTTCGAGCGATTAAGTTTATTTGTATGATCAGTTTTTGTAACTGCTTTCCTATTATTGTTATCATTACCTGTTTTAGCTGGGGCTATTACTATTCTATTGGCTGATCGAAATTTTAACACTAGGTTTTTCGATCCTGCAGGAGGAG-----------------------------
>Seq2_[organism=Batillaria_attramentaria]_[isolate=2019_101.139]
TACTTTATATATTCTATTTGGAATGTGATCTGGATTAGTTGGAACTGCTTTAAGTCTTTTAATTCGTGCAGAATTAGGGCAGCCGGGTGCATTACTCGGAGATGACCAGTTATATAATGTTATTGTAACAGCACATGCCTTTGTTATAATTTTTTTCTTAGTTATACCAATGATAATTGGGGGTTTTGGTAACTGGTTAGTTCCACTGATATTGGGGGCTCCTGATATAGCTTTTCCTCGATTAAATAATATGAGTTTTTGGCTTTTACCTCCTGCTTTACTATTATTACTTTCTTCGGCAGCCGTAGAAAGGGGAGTCGGAACAGGTTGAACTGTGTACCCTCCTTTAGCCGGAAATCTTGCACACGCAGGAGGCTCTGTAGATCTAGCAATTTTTTCTCTTCATTTAGCAGGTGTTTCCTCTATTTTAGGAGCTGTAAACTTTATTACAACTATTATTAATATACGATGACGAGGAATGCAATTTGAGCGTCTTCCTCTTTTTGTTTGATCTGTTAAAATTACGGCGATTCTCCTTTTACTTTCACTTCCTGTTTTAGCCGGAGCAATTACAATATTGTTAACTGATCGAAATTTCAATACTGCTTTCTTTGATCCTGCTGGTGGTGGAGATCCTATTTTATACCAACACCTATTT
>Seq3_[organism=Batillaria_attramentaria]_[isolate=2020_31]
TACTTTATATATTCTATTTGGAATGTGATCTGGATTAGTTGGAACTGCTTTAAGTCTTTTAATTCGTGCAGAATTAGGGCAGCCGGGTGCATTACTCGGAGATGACCAGTTATATAATGTTATTGTAACAGCACATGCCTTTGTTATAATTTTTTTCTTAGTTATACCAATGATAATTGGGGGTTTTGGTAACTGGTTAGTTCCACTGATATTGGGGGCTCCTGATATAGCTTTTCCTCGATTAAATAATATGAGTTTTTGGCTTTTACCTCCTGCTTTACTATTATTACTTTCTTCGGCAGCCGTAGAAAGGGGAGTCGGAACAGGTTGAACTGTGTACCCTCCTTTAGCCGGAAATCTTGCACACGCAGGAGGCTCTGTAGATCTAGCAATTTTTTCTCTTCATTTAGCAGGTGTTTCCTCTATTTTAGGAGCTGTAAACTTTATTACAACTATTATTAATATACGATGACGAGGAATGCAATTTGAGCGTCTTCCTCTTTTTGTTTGATCTGTTAAAATTACGGCGATTCTCCTTTTACTTTCACTTCCTGTTTTAGCCGGAGCAATTACAATATTGTTAACTGATCGAAATTTCAATACTGCTTTCTTTGATCCTGCTGGTGGTGGAGATCCTATTTTATACCAACACCTATTT
>Seq4_[organism=Batillaria_attramentaria]_[isolate=2019_97.135]
TACTTTATATATTCTATTTGGAATGTGATCTGGATTAGTTGGAACTGCTTTAAGTCTTTTAATTCGTGCAGAATTAGGGCAGCCGGGTGCATTACTCGGAGATGACCAGTTATATAATGTTATTGTAACAGCACATGCCTTTGTTATAATTTTTTTCTTAGTTATACCAATGATAATTGGGGGTTTTGGTAACTGGTTAGTTCCACTGATATTGGGGGCTCCTGATATAGCTTTTCCTCGATTAAATAATATGAGTTTTTGGCTTTTACCTCCTGCTTTACTATTATTACTTTCTTCGGCAGCCGTAGAAAGGGGAGTCGGAACAGGTTGAACTGTGTACCCTCCTTTAGCCGGAAATCTTGCACACGCAGGAGGCTCTGTAGATCTAGCAATTTTTTCTCTTCATTTAGCAGGTGTTTCCTCTATTTTAGGAGCTGTAAACTTTATTACAACTATTATTAATATACGATGACGAGGAATGCAATTTGAGCGTCTTCCTCTTTTTGTTTGATCTGTTAAAATTACGGCGATTCTCCTTTTACTTTCACTTCCTGTTTTAGCCGGAGCAATTACAATATTGTTAACTGATCGAAATTTCAATACTGCTTTCTTTGATCCTGCTGGTGGTGGAGA-------------------------
>Seq5_[organism=Batillaria_cumingii]_[isolate=2020_23]
TACTTTATATATTCTATTTGGAATATGATCTGGGTTGGTTGGAACTGCTTTAAGTCTTTTAATTCGTGCAGAGTTGGGACAGCCCGGTGCATTGCTCGGAGATGATCAGCTATATAATGTTATTGTAACAGCACATGCCTTTGTTATAATTTTTTTCTTAGTTATACCAATAATGATTGGGGGTTTTGGTAACTGGTTAGTTCCATTAATACTAGGAGCTCCTGATATAGCTTTTCCTCGATTAAATAATATAAGTTTTTGACTTTTGCCTCCTGCTTTATTACTATTGCTTTCTTCTGCAGCCGTAGAAAGAGGGGTAGGAACAGGTTGAACTGTGTATCCTCCCTTAGCTGGGAATCTTGCACATGCAGGAGGCTCTGTAGATCTAGCAATTTTTTCTCTCCACTTAGCAGGTGTTTCCTCTATTTTAGGGGCTGTAAACTTTATTACAACTATCATTAATATACGATGACGAGGAATACAATTTGAGCGTCTTCCTCTTTTTGTTTGATCTGTAAAAATTACGGCAATTCTTCTTTTACTTTCACTTCCTGTTTTAGCTGGAGCAATTACAATATTGTTAACTGATCGAAATTTCAACACTGCCTTCTTTGATCCTGCTGGTGGTGGAGATCCTATTTTATACCAGCATCTATTT
>Seq6_[organism=Batillaria_zonalis]_[isolate=2020_41]
TACTTTATATATTCTATTTGGAATGTGATCTGGATTAGTTGGAACTGCTTTAAGTCTTTTAATTCGTGCGGAATTAGGACAACCTGGTGCACTACTTGGAGATGACCAGTTATATAATGTTATTGTAACAGCACATGCCTTTGTTATAATTTTTTTCTTGGTCATACCGATAATGATTGGGGGCTTTGGTAATTGATTAGTTCCATTAATGTTAGGGGCTCCTGATATAGCTTTTCCCCGGCTAAATAATATAAGTTTTTGACTTTTGCCTCCTGCTTTACTATTATTGCTTTCTTCCGCAGCCGTAGAAAGAGGAGTGGGAACAGGTTGAACTGTGTACCCCCCTTTGGCTGGAAATCTTGCGCACGCAGGAGGTTCTGTAGATCTAGCAATTTTTTCCCTTCATTTAGCAGGTGTTTCTTCTATTCTGGGTGCTGTAAACTTTATTACAACTATTATTAACATACGGTGACGGGGAATACAATTTGAACGTCTTCCTCTTTTTGTTTGATCTGTTAAAATTACAGCAATTCTCCTTCTACTTTCACTTCCTGTGTTAGCTGGAGCGATTACGATGTTGCTAACTGACCGAAATTTTAATACTGCTTTCTTTGATCCTGCAGGCGGTGGAGATCCTATTTTGTATCAACATCTATTT
>Seq7_[organism=Batillaria_zonalis]_[isolate=2020_49]
TACTTTATATATTCTATTTGGAATGTGATCTGGATTAGTTGGAACTGCTTTAAGTCTTTTAATTCGTGCGGAATTAGGACAACCTGGTGCACTACTTGGAGATGACCAGCTATATAATGTTATTGTAACAGCACATGCCTTTGTTATAATTTTTTTCTTGGTCATACCAATAATGATTGGGGGCTTTGGTAATTGATTAGTTCCATTGATGTTAGGGGCTCCTGATATAGCTTTTCCCCGGCTAAATAATATAAGTTTTTGACTTTTGCCTCCTGCTTTACTATTATTGCTTTCTTCCGCAGCCGTAGAAAGAGGAGTGGGAACAGGTTGAACTGTGTACCCCCCTTTGGCTGGAAATCTTGCGCACGCAGGAGGTTCTGTAGATCTAGCAATTTTTTCCCTTCATTTAGCAGGTGTTTCTTCTATTCTGGGTGCTGTAAACTTTATTACAACTATTATTAACATACGGTGACGGGGAATACAATTTGAACGTCTTCCTCTTTTTGTTTGATCTGTTAAAATTACAGCAATTCTCCTTCTACTTTCACTTCCTGTGTTAGCTGGAGCGATTACGATGTTGCTAACTGACCGAAATTTTAATACTGCTTTCTTTGATCCTGCAGGCGGTGGAGATCCTATTTTGTATCAACATCTATTT
>Seq8_[organism=Cassidula_aurisfelis]_[isolate=2020_77]
AACATTATACATAGTGTTTGGAGTTTGATGCGGGCTTGTCGGAACTGGCCTGTCTCTGCTAATTCGATTTGAGCTGGGAACGGCAGGGAATCTTTTA---GACGACCATTTCTATAATGTCATTGTTACAGCCCATGCATTTGTAATGATTTTCTTCATAGTGATGCCCCTAATAATCGGGGGGTTTGGGAACTGAATGGTACCTTTACTTATTGGGGCACCAGATATAAGTTTTCCTCGAATGAATAATATAAGTTTTTGACTACTACCCCCTTCTTTCATTTTACTGATTTGTTCTAGTATAGTAGAAGGTGGGGCGGGAACAGGTTGAACTGTTTACCCGCCTCTTAGAGGTCCAATTGGGCATGGTGGTGCATCTGTGGACTTAGTAATTTTCTCATTGCACTTAGCAGGGATGTCCTCTATTCTAGGGGCGATTAACTTTATCACGACTATCTTTAACATGCGGTCCCCAGGAATGACTATGGAACGGGTGAACTTGTTTGTGTGATCAATTTTAGTAACCGTGTTCCTATTACTCCTATCTTTACCTGTCTTAGCCGGCGCAATTACAATGTTGCTGACAGACCGAAATTTCAATACCAGCTTCTTCGACCCAGCAGGAGGGGGGGATCCGATTCTCTACCAGCACTTGTTT
>Seq9_[organism=Cassidula_aurisfelis]_[isolate=Ca3_43]
AACATTATACATAGTGTTTGGAGTTTGATGCGGGCTTGTCGGAACTGGCCTGTCTCTGCTAATTCGATTTGAGCTGGGAACGGCAGGGAATCTTTTA---GACGACCATTTCTATAATGTCATTGTTACAGCCCATGCATTTGTAATGATTTTCTTCATAGTGATGCCCCTAATAATCGGGGGGTTTGGGAACTGAATGGTACCTTTACTTATTGGGGCACCAGATATAAGTTTTCCTCGAATGAATAATATAAGTTTTTGACTATTACCCCCTTCTTTCATTTTACTGATTTGTTCTAGTATAGTAGAAGGTGGGGCGGGAACAGGTTGAACTGTTTACCCGCCTCTTAGAGGTCCAATTGGGCATGGTGGTGCATCTGTGGACTTAGTAATTTTCTCATTGCACTTAGCAGGGATGTCCTCTATTCTAGGAGCGATTAACTTTATCACGACTATCTTTAACATGCGGTCCCCAGGAATGACTATGGAACGGGTGAACTTGTTTGTGTGATCAATTTTAGTAACCGTGTTCCTATTACTCCTATCTTTACCTGTCTTAGCCGGTGCAATTACAATGTTGCTGACAGACCGAAATT--------------------------------------------------------------
>Seq10_[organism=Cassidula_plecotrematoides]_[isolate=2020_55]
TACATTGTATATAATCTTTGGAGTATGATGTGGCCTTGTAGGGACTGGGCTTTCTCTCTTAATTCGATTTGAGTTAGGGACGGCAGGAAATCTTTTA---GATGACCACTTTTATAATGTTATTGTAACTGCCCATGCATTTGTAATGATTTTTTTTATAGTAATACCCCTAATAATTGGTGGTTTCGGTAATTGAATGGTACCGCTACTTATTGGAGCACCAGATATAAGCTTTCCGCGAATAAATAATATAAGGTTTTGGTTGTTGCCCCCTTCCTTTGTGTTATTAATTTGTTCTAGTATGGTAGAAGGTGGTGCCGGAACTGGGTGAACTGTGTATCCACCGCTGAGTGGCCCAATCGGCCATGGAGGTGCTTCTGTAGATTTAGTAATTTTTTCCCTTCACTTAGCCGGGATGTCCTCTATTTTAGGGGCTATCAATTTCATTACTACAATTTTTAATATGCGGTCGCCTGGTATGACAATAGAACGAGTGAACTTATTTGTTTGGTCGATCTTGGTAACGGTATTTCTTTTACTTTTGTCCCTTCCAGTTTTGGCAGGAGCAATTACTATATTACTCACAGATCGTAATTTTAATACAAGCTTCTTTGATCCGGCAGGAGGTGGGGATCCAATCTTATACCAGCATCTATTC
>Seq11_[organism=Cerithidea_tonkiniana]_[isolate=2019_68.108]
AACTTTATATATTTTATTTGGTATGTGGTCTGGCTTAGTTGGGACTGCTCTTAGTCTCTTAATTCGAGCTGAATTAGGTCAGCCCGGGGCTTTGCTCGGTGATGATCAGCTATATAACGTAATTGTCACAGCCCATGCATTCGTTATAATTTTCTTTTTAGTGATACCTATAATGATTGGTGGATTCGGAAACTGGCTCGTTCCATTAATATTAGGAGCCCCAGACATAGCTTTCCCTCGACTAAATAATATGAGTTTTTGGTTACTTCCTCCAGCGCTCTTACTTCTTCTTTCTTCTGCTGCGGTCGAAAGAGGAGTCGGGACAGGCTGAACTGTTTATCCTCCTCTAGCTGGGAACTTGGCACACGCAGGTGGTTCTGTTGATCTAGCTATTTTCTCCCTTCATTTAGCTGGTGTTTCTTCAATTTTAGGTGCAGTAAACTTTATTACTACAATTATTAATATGCGATGGCGAGGAATACAATTTGAACGTCTTCCCCTTTTTGTTTGATCAGTAAAAATTACTGCAATCCTTCTTCTTCTATCCCTTCCTGTGTTAGCAGGAGCTATTACTATGCTATTAACAGATCGGAATTTTAATACAGCTTTCTTTGATCCTGCGGGAGGAGGGGATCCAATTTTATACCAGCACCTCTTT
>Seq12_[organism=Cerithidea_moerchii]_[isolate=2019_81.120]
AACTTTGTATATTTTGTTTGGTATATGATCTGGTTTAGTTGGAACTGCTCTTAGCCTCCTAATTCGAGCTGAATTAGGTCAACCTGGAGCTTTGCTCGGCGACGATCAGCTATATAACGTGATTGTTACAGCTCATGCATTCGTCATAATTTTCTTTTTGGTAATGCCTATAATAATTGGTGGATTTGGAAACTGACTTGTTCCCTTAATATTAGGAGCCCCGGATATGGCCTTTCCTCGGCTGAATAATATAAGTTTCTGGCTGCTTCCTCCAGCGCTCCTACTTCTTCTATCTTCCGCTGCGGTTGAGAGAGGGGTTGGGACAGGGTGAACCGTTTATCCCCCTTTAGCTGGGAACTTAGCGCACGCGGGTGGTTCTGTGGATCTGGCTATTTTTTCTCTCCACTTAGCTGGTGTTTCTTCTATTCTAGGTGCAGTAAACTTTATTACTACAATTATTAATATACGATGACGAGGAATACAATTTGAGCGTCTTCCCCTTTTTGTTTGATCGGTAAAAATTACTGCAATTCTTCTCCTTCTGTCCCTTCCTGTACTGGCTGGAGCTATTACTATGCTTCTGACAGATCGGAATTTTAATACGGCTTTCTTTGACCCT---------------------------------------
>Seq13_[organism=Cerithidea_moerchii]_[isolate=2019_92.131]
AACTTTGTATATTTTGTTTGGTATATGATCTGGTTTAGTTGGAACTGCTCTTAGCCTCCTAATTCGAGCTGAATTAGGTCAACCTGGAGCTTTGCTCGGCGACGATCAGCTATATAACGTGATTGTTACAGCTCATGCATTCGTCATAATTTTCTTTTTGGTAATGCCTATAATAATTGGTGGATTTGGAAACTGACTTGTTCCCTTAATATTAGGAGCCCCGGATATGGCCTTTCCTCGGCTGAATAATATAAGTTTCTGGCTGCTTCCTCCAGCGCTCCTACTTCTTCTATCTTCCGCTGCGGTTGAGAGAGGGGTTGGGACAGGATGAACCGTTTATCCCCCTTTGGCTGGGAACTTAGCGCACGCGGGTGGTTCTGTGGATCTGGCTATTTTTTCTCTCCACTTAGCTGGTGTTTCTTCTATTCTAGGTGCAGTAAACTTTATTACTACGATTATTAATATACGATGACGAGGAATACAATTTGAGCGTCTTCCCCTTTTTGTTTGATCGGTAAAAATTACTGCAATTCTTCTCCTTCTATCCCTTCCTGTACTGGCTGGAGCTATTACTATGCTTCTGACAGATCGGAATTTTAATACGGCTTTCTTTGACCCTGCTGGGGGAGGAGATCCAATTTTATATCAGC--------
>Seq14_[organism=Cerithium_coralium]_[isolate=2019_147.185]
--------------------GGATGTGATCGGGATTGGTGGGAACTGCCCTAAGCCTTTTAATTCGTGCTGAATTAGGTCAGCCTGGTGCTCTTCTTGGAGATGACCAACTGTATAACGTAATTGTTACAGCACATGCTTTTGTTATAATTTTCTTTTTAGTTATGCCAATAATAATTGGTGGCTTTGGCAATTGGCTAGTCCCCCTGATGCTTGGGGCTCCTGATATGGCTTTTCCTCGACTAAATAATATAAGTTTCTGACTTCTTCCTCCTGCTCTCCTTCTCCTTTTATCTTCAGCAGCGGTGGAAAGAGGTGTGGGAACAGGGTGAACTGTTTATCCTCCTCTTGCAGGAAATCTGGCCCATGCGGGAGGATCGGTTGACTTAGCCATCTTTTCGTTACATTTAGCAGGGGTTTCTTCGATTTTAGGGGCTGTAAACTTTATTACCACAATCATCAATATACGGTGACGAGGAATGCAGTTTGAACGGCTCCCTCT-------------------------------------------------------------------------------------------------------------------------------------------------------------
>Seq15_[organism=Cerithium_coralium]_[isolate=2019_167.205]
--------------------GGATGTGATCGGGATTGGTGGGAACTGCCCTAAGCCTTTTAATTCGTGCTGAATTAGGTCAGCCTGGTGCTCTCCTTGGAGATGACCAACTGTATAACGTAATTGTTACAGCACATGCTTTTGTTATAATTTTCTTTTTAGTTATGCCAATAATAATTGGTGGCTTTGGCAATTGGCTAGTCCCCCTGATGCTTGGGGCTCCTGATATGGCTTTTCCTCGACTAAATAATATAAGTTTCTGACTTCTTCCTCCTGCTCTCCTTCTCCTCTTATCTTCAGCAGCGGTGGAAAGAGGTGTGGGAACAGGGTGAACTGTTTATCCTCCTCTTGCAGGAAATCTGGCCCATGCGGGAGGATCGGTTGACTTAGCCATCTTTTCGTTACATTTAGCAGGGGTTTCTTCGATTTTAGGGGCTGTAAACTTTATTACCACAATCATCAATATACGGTGACGAGGAATGCAGTTTGAACGGCTCCCTCTTTTTGTGTGATCTGTAAAAATTACTGCCATTCTTCTTCTTCTATCTATACCGGTTTTAGCGGGAGCTATTACCATACTCTTAACGGACCGAAATTTTAATACAGCCTTCTTTGACCCTGCAGGTGGTGGGGATCCTAT-------------------
>Seq16_[organism=Clithon_oualaniense]_[isolate=2020_33]
TACTTTGTATATTATGTTTGGTGTGTGATCTGGGCTGGTAGGAACTGCTCTTAGTTTATTGATTCGAGCTGAGCTTGGACAGCCTGGTGCTTTGTTAGGGGACGATCAATTATATAATGTAATTGTGACTGCTCATGCATTTGTAATAATTTTCTTTTTAGTTATGCCAATGATAATTGGTGGATTCGGTAATTGATTAGTACCTTTGATGTTAGGGGCTCCTGATATGGCTTTTCCTCGATTAAATAATATAAGTTTTTGACTTTTACCTCCTTCACTAACTCTTTTATTAGCTTCTTCAGCCGTTGAAAGAGGGGTTGGAACTGGTTGAACTGTATACCCTCCCCTATCCGGTAATTTAGCTCATGCTGGTGGGTCGGTAGATCTAGCTATTTTTTCACTTCATTTGGCGGGTGTTTCATCAATTTTAGGTGCAGTAAATTTCATTACGACAATTATTAATATGCGGTGACAAGGGATGCAGTTTGAGCGTCTTCCATTGTTTGTATGATCTGTAAAGATTACTGCAATTTTACTTTTACTTTCCCTTCCTGTATTGGCGGGTGCAATTACTATGTTGTTAACCGATCGAAATTTTAATACTTCATTTTTTGATCCGGCAGGTGGGGGTGATCCAATTCTATATCAACACTTGTTT
>Seq17_[organism=Clithon_oualaniense]_[isolate=2020_34]
TACTTTGTATATTATGTTTGGTGTGTGATCTGGGTTGGTAGGAACTGCTCTTAGTTTATTGATTCGAGCTGAGCTTGGACAGCCTGGTGCTTTGTTAGGGGATGATCAATTATATAATGTAATTGTGACTGCTCATGCATTTGTAATAATTTTCTTTTTAGTTATGCCAATGATAATTGGTGGATTCGGTAATTGATTAGTACCTTTGATGTTAGGGGCTCCTGATATGGCTTTTCCTCGATTAAATAATATAAGTTTTTGACTTTTACCTCCTTCACTAACTCTTTTATTAGCTTCTTCAGCCGTTGAAAGAGGGGTTGGAACTGGTTGAACTGTATACCCTCCCCTATCTGGTAATTTAGCTCATGCTGGTGGGTCGGTAGATCTAGCTATTTTCTCACTTCATTTGGCGGGTGTTTCATCAATTTTAGGTGCAGTAAATTTCATTACAACAATTATTAATATGCGGTGACAAGGAATGCAGTTTGAGCGTCTTCCATTGTTTGTATGATCTGTAAAGATTACTGCAATTTTACTTTTACTTTCCCTTCCTGTATTGGCGGGTGCAATTACTATGTTGTTAACCGATCGAAATTTTAATACTTCATTTTTTGATCCGGCAGGTGGGGGTGATCCAATTCTATATCAACACTTGTTT
>Seq18_[organism=Clithon_oualaniense]_[isolate=2020_60]
TACTTTGTATATTATGTTTGGTGTGTGATCTGGGTTGGTAGGAACTGCTCTTAGTTTATTGATTCGAGCTGAGCTTGGACAGCCTGGTGCTTTGTTAGGGGATGATCAATTATATAATGTAATTGTGACTGCTCATGCATTTGTAATAATTTTCTTTTTAGTTATGCCAATGATAATTGGTGGATTCGGTAATTGATTAGTACCTTTGATGTTAGGGGCTCCTGATATGGCTTTTCCTCGATTAAATAATATAAGTTTTTGACTTTTACCTCCTTCACTAACTCTTTTATTAGCTTCTTCAGCCGTTGAAAGAGGGGTTGGAACTGGTTGAACTGTATACCCTCCCCTATCTGGTAATTTAGCTCATGCTGGTGGGTCGGTAGATCTAGCTATTTTCTCACTTCATTTGGCGGGTGTTTCATCAATTTTAGGTGCAGTAAATTTCATTACAACAATTATTAATATGCGGTGACAAGGAATGCAGTTTGAGCGTCTTCCATTGTTTGTATGATCTGTAAAGATTACTGCAATTTTACTTTTACTTTCCCTTCCTGTATTGGCGGGTGCAATTACTATGTTGTTAACCGATCGAAATTTTAATACTTCATTTTTTGATCCGGCAGGTGGGGGTGATCCAATTCTATATCAACACTTGTTT
>Seq19_[organism=Clithon_oualaniense]_[isolate=2019_4.17]
TACTTTGTATATTATGTTTGGTGTGTGATCTGGGTTGGTAGGAACTGCTCTTAGTTTATTGATTCGAGCTGAGCTTGGACAGCCTGGTGCTTTGTTAGGGGATGATCAATTATATAATGTAATTGTGACTGCTCATGCATTTGTAATAATTTTCTTTTTAGTTATGCCAATGATAATTGGTGGATTCGGTAATTGATTAGTACCTTTGATGTTAGGGGCTCCTGATATGGCTTTTCCTCGATTAAATAATATAAGTTTTTGACTTTTACCTCCTTCACTAACTCTTTTATTAGCTTCTTCAGCCGTTGAAAGAGGGGTTGGAACTGGTTGAACTGTATACCCTCCCCTATCTGGTAATTTAGCTCATGCTGGTGGGTCGGTAGATCTAGCTATTTTCTCACTTCATTTGGCGGGTGTTTCATCAATTTTAGGTGCAGTAAATTTCATTACAACAATTATTAATATGCGGTGACAAGGAATGCAGTTTGAGCGTCTTCCATTGTTTGTATGATCTGTAAAGATTACTGCAATTTTACTTTTACTTTCCCTTCCTGTATTGGCGGGTGCAATTACTATGTTGTTAACCGATCGAAATTTTAATACTTCATTTTTTGATCCGGCAGGTGGGGGTGATCCAATCCTATATCAACACTTGTTT
>Seq20_[organism=Clithon_sowerbianum]_[isolate=2019_1.19]
-----------------------------CTGGGCTGGTTGGGACTGCTCTTAGCTTGTTAATTCGAGCTGAGCTTGGACAACCTGGTGCTTTGCTTGGGGATGACCAATTATATAACGTAATTGTGACTGCTCATGCGTTTGTAATAATTTTCTTTTTGGTTATGCCAATGATGATTGGTGGGTTTGGTAATTGATTGGTGCCTTTAATGCTGGGGGCTCCTGATATGGCTTTTCCTCGTCTTAATAACATGAGTTTTTGACTACTTCCTCCTTCATTAACTTTACTGTTGGCTTCATCTGCTGTTGAAAGGGGAGTAGGGACTGGTTGAACTGTTTACCCTCCATTGTCTGGTAATTTAGCTCACGCTGGTGGGTCAGTGGATTTAGCAATTTTTTCTCTCCACTTAGCTGGTGTTTCATCAATTCTAGGTGCAGTGAATTTTATTACTACAATTATTAATATGCGATGACAAGGAATGCAGTTTGAACGATTGCCATTATTCGTTTGATCTGTGAAGATTACTGCGATTTTGTTGTTGTTATCTTTGCCTGTGTTAGCGGGAGCAATTACTATATTGCTAACTGATCGGAATTTCAATACATCATTCTTTGATCCAGCAGGTGGGGGTGATCCTATTTTATACCAACATTTGTTT
>Seq21_[organism=Clithon_sowerbianum]_[isolate=2019_2.20]
----------------------------------------------GCTCTTAGCTTGTTAATTCGAGCTGAGCTTGGACAACCTGGTGCTTTGCTTGGGGATGACCAATTATATAACGTAATTGTGACTGCTCATGCGTTTGTAATAATTTTCTTTTTGGTTATGCCAATGATGATTGGTGGGTTTGGTAATTGATTGGTGCCTTTAATGCTGGGGGCTCCTGATATGGCTTTTCCTCGTCTTAATAACATGAGTTTTTGACTACTTCCTCCTTCATTAACTTTACTGTTGGCTTCATCTGCTGTTGAAAGGGGAGTAGGGACTGGTTGAACTGTTTACCCTCCATTGTCTGGTAATTTAGCTCACGCTGGTGGGTCAGTGGATTTAGCAATTTTTTCTCTCCACTTAGCTGGTGTTTCATCAATTCTAGGTGCGGTGAATTTTATTACTACAATTATTAATATGCGATGACAAGGAATGCAGTTTGAACGATTACCATTATTCGTTTGATCTGTAAAGATTACTGCGATTTTGTTGTTGTTATCTTTGCCTGTGTTAGCGGGAGCAATTACTATATTGTTAACTGATCGGAATTTCAATACATCATTCTTTGATCCAGCAGGTGGGGGTGATCCTATCTTATACCAACATTTGTTT
>Seq22_[organism=Clithon_sowerbianum]_[isolate=Cl2_14]
TACTTTGTATATTATGTTTGGTGTATGATCTGGGCTGGTTGGGACTGCTCTTAGCTTGTTAATTCGAGCTGAGCTTGGACAACCTGGTGCTTTGCTTGGGGATGACCAATTATATAACGTAATTGTGACTGCTCATGCGTTTGTAATAATTTTCTTTTTGGTTATGCCAATGATGATTGGTGGGTTTGGTAATTGATTGGTGCCTTTAATGCTGGGGGCTCCTGATATGGCTTTTCCTCGTCTTAATAACATGAGTTTTTGACTACTTCCTCCTTCATTAACTTTACTGTTGGCTTCATCTGCTGTTGAAAGGGGAGTAGGGACTGGTTGAACTGTTTACCCTCCATTGTCTGGTAATTTAGCTCACGCTGGTGGGTCAGTGGATTTAGCAATTTTTTCTCTCCACTTAGCTGGTGTTTCATCAATTCTAGGTGCAGTGAATTTTATTACTACAATTATTAATATGCGATGACAAGGAATGCAGTTTGAACGATTGCCATTATTCGTTTGATCTGTGAAGATTACTGCGATTTTGTTGTTGTTATCTTTGCCTGTGTTAGCGGGAGCAATTACTATATTGCTAACTGATCGGAATTTCAATACATCATTCTTTGATCCAGCAGGTGGGGGTGATCCTATTTTATACCAACATTTGTTT
>Seq23_[organism=Clithon_sowerbianum]_[isolate=HK07]
------------------------------------------------------------------------------------TGGGGCTTTGCTTGGGGATGACCAATTATATAACGTAATTGTGACTGCTCATGCGTTTGTAATAATTTTCTTTTTGGTTATGCCAATGATGATTGGTGGGTTTGGTAATTGATTGGTGCCTTTAATGCTGGGGGCTCCTGATATGGCTTTTCCTCGTCTTAATAACATGAGTTTTTGACTACTTCCTCCTTCATTAACTTTACTGTTGGCTTCATCTGCTGTTGAAAGGGGAGTAGGGACTGGTTGAACTGTTTACCCTCCATTGTCTGGTAATTTAGCTCACGCTGGTGGGTCAGTGGATTTAGCAATTTTTTCTCTCCACTTAGCTGGTGTTTCATCAATTCTAGGTGCAGTGAATTTTATTACTACAATTATTAATATGCGATGACAAGGAATGCAGTTTGAACGATTGCCATTATTCGTTTGATCTGTGAAGATTACTGCGATTTTGTTGTTGTTATCTTTGCCTGTGTTAGCGGGAGCAATTACTATATTGCTAACTGATCGGAATTTCAATACATCATTCTTTGATCCAGCAGGTGGGGGTGATCCTATTTTATACCAACATTTGTTT
>Seq24_[organism=Clithon_sowerbianum]_[isolate=HK08]
--------------------------------------------------------------------------------------------------------ACCAATTATATAACGTAATTGTGACTGCTCATGCGTTTGTAATAATTTTCTTTTTGGTTATGCCAATGATGATTGGTGGGTTTGGTAATTGATTGGTGCCTTTAATGCTGGGGGCTCCTGATATGGCTTTTCCTCGTCTTAATAACATGAGTTTTTGACTACTTCCTCCTTCATTAACTTTACTGTTGGCTTCATCTGCTGTTGAAAGGGGAGTAGGGACTGGTTGAACTGTTTACCCTCCATTGTCTGGTAATTTAGCTCACGCTGGTGGGTCAGTGGATTTAGCAATTTTTTCTCTCCACTTAGCTGGTGTTTCATCAATTCTAGGTGCAGTGAATTTTATTACTACAATTATTAATATGCGATGACAAGGAATGCAGTTTGAACGATTGCCATTATTCGTTTGATCTGTGAAGATTACTGCGATTTTGTTGTTGTTATCTTTGCCTGTGTTAGCGGGAGCAATTACTATATTGCTAACTGATCGGAATTTCAATACATCATTCTTTGATCCAGCAGGTGGGGGTGATCCTATTTTATACCAACATTTGTTT
>Seq25_[organism=Clypeomorus_sp.]_[isolate=2019_127.165]
-----------------------------CAGGCTTAGTAGGAACTGCCTTAAGTCTTTTAATTCGTGCTGAATTAGGTCAGCCCGGAGCTCTTCTTGGGGACGACCAGCTATACAATGTCATTGTGACAGCACATGCCTTTGTTATAATTTTCTTTTTAGTTATACCTATGATAATTGGTGGATTTGGAAACTGATTAGTTCCTCTAATGTTAGGGGCTCCTGACATAGCTTTCCCTCGATTGAATAACATAAGTTTCTGACTTCTTCCTCCTGCCCTTCTCCTTCTTCTTTCTTCAGCAGCAGTGGAAAGAGGTGTTGGGACAGGTTGAACTGTATATCCCCCGTTAGCAGGAAATTTAGCTCACGCAGGAGGTTCGGTTGATCTAGCTATTTTCTCGCTTCATTTAGCCGGTGTTTCTTCAATTTTAGGGGCTGTAAATTTTATTACTACCATTATTAACATGCGATGACGAGGAATACAATTTGAGCGACTCCCTCTCTTTGTTTGATCTGTAAAAATTACTGCCATTCTTCTCTTATTGTCTTTGCCAGTTTTAGCAGGAGCGATTACTATGCTTTTAACGGATCGAAATTTTAACACAGCCTTCTTCGATCCTGCTGGAGGTGG----------------------------
>Seq26_[organism=Clypeomorus_sp.]_[isolate=2020_48]
AACTTTATATATTTTATTCGGAATATGATCAGGCTTAGTAGGAACTGCCTTAAGTCTTTTAATTCGTGCTGAATTAGGTCAGCCCGGAGCTCTTCTTGGGGACGACCAGTTATACAATGTGATTGTGACAGCACATGCCTTTGTTATAATTTTCTTTTTAGTTATACCTATGATAATTGGTGGATTTGGAAACTGATTAGTTCCTCTAATGTTAGGGGCTCCTGACATAGCTTTCCCTCGATTGAATAACATAAGTTTCTGACTTCTTCCTCCTGCTCTTCTCCTTCTTCTTTCTTCAGCAGCAGTGGAAAGAGGTGTTGGGACAGGTTGAACTGTATATCCCCCGTTAGCAGGAAATTTAGCTCACGCAGGAGGTTCGGTTGATCTAGCTATTTTCTCGCTTCATTTAGCCGGTGTTTCTTCAATTTTAGGGGCTGTAAATTTTATTACTACTATTATTAACATGCGATGACGAGGAATACAATTTGAGCGACTTCCTCTCTTTGTTTGATCTGTAAAAATTACTGCCATTCTTCTCTTATTGTCTTTGCCAGTTTTAGCAGGAGCGATTACTATGCTTTTAACGGATCGAAATTTTAACACAGCCTTCTTTGATCCTGCTGGAGGTGGAGACCCTATTTTGTACCAGCATCTCTTT
>Seq27_[organism=Clypeomorus_sp.]_[isolate=2019_79.118]
------------------------------------------------------------------------------------------------------------------------------GACAGCACATGCCTTTGTTATAATTTTCTTTTTAGTTATACCTATGATAATTGGTGGATTTGGAAACTGATTAGTTCCTCTAATGTTAGGGGCTCCTGACATAGCTTTCCCTCGATTGAATAACATAAGTTTCTGACTTCTTCCTCCTGCTCTTCTCCTTCTTCTTTCTTCAGCAGCAGTGGAAAGAGGTGTTGGGACAGGTTGAACTGTATATCCCCCGTTAGCAGGAAATTTAGCTCACGCAGGAGGTTCGGTTGATCTAGCTATTTTCTCGCTTCATTTAGCCGGTGTTTCTTCAATTTTAGGGGCTGTAAATTTTATTACTACTATTATTAACATGCGATGACGGGGAATACAATTTGAGCGACTTCCTCTCTTTGTTTGATCTGTAAAAATTACTGCCATTCTTCTCTTATTGTCTTTGCCAGTTTTAGCAGGAGCGATTACTATGCTTTTAACGGATCGAAATTTTAACACAGCCTTTTTTGATCCTGCTGGAGGTGGAGACCCTATTTTGTACCAGCATCTCTTT
>Seq28_[organism=Ellobium_sp.]_[isolate=2020_66]
GACGTTATACATAATTTTTGGAGTCTGATGTGGCTTGGTTGGAACCGGGCTTTCACTTCTTATTCGGTTTGAGTTAGGAACTGCTGGAAACTTATTG---GATGATCATTTCTATAATGTTATTGTCACTGCGCACGCTTTCGTGATGATTTTTTTTATGGTGATGCCCCTAATAATTGGAGGGTTTGGGAATTGAATAATTCCCTTGCTTATCGGTGCACCTGATATAAGCTTTCCACGGATAAATAATATGAGTTTTTGGCTTCTTCCACCTTCCTTTGTTTTGTTAATCTGTTCTAGGATGGTAGAAGGCGGGGCTGGAACTGGATGGACTGTATACCCTCCCCTAAGAGGGCCAATTGCTCATGCCGGTGCTTCGGTGGATCTTGTTATTTTCTCATTACACCTTGCCGGGATATCTTCTATCCTGGGGGCTATTAATTTCATTACTACGGTGTTTAATATACGGTCACCGGGCATGACAATGGAGCGGGTCAACCTTTTTGTTTGATCTGTCCTTGTAACAGTTTTCTTGCTCTTGCTTTCCCTTCCCGTCTTGGCTGGAGCTATCACGATGTTGTTAACAGATCGGAATTTTAACACTAGCTTTTTTGACCCTGCTGGTGGGGGAGATCCTATCTTGTACCAACACCTTTTC
>Seq29_[organism=Ellobium_sp.]_[isolate=2019_72.112]
GACGTTATACATAATTTTTGGAGTCTGATGTGGCTTGGTTGGAACCGGGCTTTCACTTCTTATTCGGTTTGAGTTAGGAACTGCTGGAAACTTATTG---GATGATCATTTCTATAATGTTATTGTCACTGCGCACGCTTTCGTGATGATTTTTTTTATGGTGATGCCCCTAATAATTGGAGGGTTTGGGAATTGAATAATTCCCTTGCTTATCGGTGCACCTGATATAAGCTTTCCACGGATAAATAATATGAGTTTTTGGCTTCTTCCACCTTCCTTTGTTTTGTTAATCTGTTCTAGGATGGTAGAAGGCGGGGCTGGAACTGGATGGACTGTATACCCTCCTCTAAGAGGGCCAATTGCTCATGCCGGTGCCTCGGTGGATCTTGTTATTTTCTCATTACACCTTGCCGGGATATCTTCTATCCTGGGGGCTATTAATTTCATTACTACGGTGTTTAATATACGGTCACCGGGCATGACAATGGAGCGGGTCAACCTTTTTGTTTGATCTGTCCTTGTAACAGTTTTCTTGCTCTTGCTTTCCCTTCCCGTCTTGGCTGGAGCTATTACGATGTTGTTAACAGATCGGAATTTTAACACTAGCTTTTTT---------------------------------------------
>Seq30_[organism=Ellobium_sp.]_[isolate=2019_74.114]
-----------------------------GTGGCCTGGTTGGAACCGGGCTTTCACTTCTTATTCGGTTTGAGTTAGGAACTGCTGGAAACTTATTG---GATGATCATTTCTATAATGTTATTGTCACTGCGCACGCTTTCGTGATGATTTTTTTTATGGTGATGCCGCTAATAATTGGAGGGTTTGGGAATTGAATAATTCCCTTGCTTATCGGCGCACCTGATATAAGCTTTCCACGGATAAATAATATGAGTTTTTGGCTTCTTCCACCTTCCTTTGTTTTGTTAATCTGTTCTAGGATGGTAGAAGGCGGGGCTGGAACTGGATGGACTGTATACCCTCCTCTAAGAGGGCCAATTGCTCATGCCGGTGCTTCGGTGGATCTTGTTATTTTCTCATTACACCTTGCCGGGATATCTTCTATCCTGGGGGCTATTAATTTCATTACTACGGTGTTTAATATACGGTCACCGGGCATGACAATGGAGCGGGTCAACCTTTTTGTTTGATCTGTCCTTGTAACAGTTTTCTTGCTCTTGCTTTCCCTTCCCGTCTTAGCTGGAGCTATCACGATGTTGTTAACAGATCGGAATTTTAACACTAGCTTTTTTGACCCTGCTGGTGGGGGAGATCCTATCTTGTACCAACACCTTTTC
>Seq31_[organism=Ellobium_chinense]_[isolate=2019_109]
GACGTTGTATATAATTTTTGGGGTTTGGTGTGGCTTAGTTGGAACTGGGCTGTCACTTCTTATTCGGTTTGAATTAGGAACCGCCGGCAACTTGCTA---GATGATCACTTTTATAATGTTATTGTGACTGCGCACGCTTTTGTGATAATTTTTTTTATGGTAATACCCTTAATGATCGGGGGGTTCGGAAATTGAATAATTCCTTTGCTTATTGGTGCCCCGGACATAAGCTTTCCGCGGATAAATAACATAAGTTTCTGGCTCTTACCCCCTTCTTTTGTTCTACTAATTTGTTCTAGAATGGTAGAAGGTGGGGCTGGGACTGGATGAACTGTCTATCCTCCCTTGAGGGGACCAATTGCTCATGCGGGGGCCTCGGTAGATCTTGTTATTTTCTCATTGCATCTTGCCGGAATGTCTTCTATTTTAGGGGCTATTAATTTTATTACTACTGTGTTTAATATACGATCGCCGGGAATGACAATGGAACGAGTCAACCTTTTTGTTTGGTCTGTTCTCGTAACAGTTTTTTTACTTTTACTATCCCTTCCTGTTTTGGCAGGGGCCATTACGATGCTCCTGACGGATCGAAATTTTAATACTAGTTTTTTTGATCCTGCTGGTGGTGGGGATCCTATTTTATATCAGCACCTTTTC
>Seq32_[organism=Laemodonta_punctatostriata]_[isolate=2020_63]
TACCTTATATATGATTTTCGGTGTCTGATGCGGTCTAGTTGGAACTGGACTTTCATTATTAATCCGATTTGAATTAGGTACAGCAGGGAACTTACTA---GATGATCATTTTTATAATGTAATCGTGACAGCACATGCTTTTGTTATAATTTTTTTTATAGTTATACCGCTAATAATTGGCGGGTTTGGTAATTGAATAGTGCCCCTTTTAATTGGTGCACCCGATATAAGTTTTCCACGTATAAACAACATAAGGTTTTGATTACTACCGCCATCATTTATCTTATTAATTTGTTCCAGCATAGTAGAAGGAGGTGCGGGAACTGGGTGAACTGTATACCCCCCGTTGAGTGGGCCTATGGGCCACGGAGGTGCATCTGTTGATCTAGTTATTTTTTCTTTACATCTTGCTGGTATATCATCTATTCTAGGGGCTATTAATTTTATTACCACTATTTTTAATATACGATCACCCGGGATAAAGATAGAACGAGTAAATCTGTTTGTTTGGTCTATCTTGGTTACCGTATTTTTATTACTCTTGTCCTTACCTGTGTTAGCCGGAGCTATTACAATGCTTCTTACTGATCGAAACTTTAATACTAGTTTTTTCGACCCAGCCGGTGGAGGGGATCCTATTTTATACCAGCACCTATTT
>Seq33_[organism=Laemodonta_punctatostriata]_[isolate=2019_82.121]
-------------------------------------------------------------------------------------------TTACTA---GATGATCATTTTTATACTGTAATCGTGACAGCACATGCTTTCGTTATAATTTTTTTTATAGTTATACCGCTAATAATTGGCGGGTTTGGTAATTGAATGGTGCCCCTTTTAATTGGTGCACCCGATATAAGTTTTCCACGTATAAACAACATAAGGTTTTGATTACTACCGCCATCATTTATCTTATTAATTTGTTCCAGCATAGTAGAAGGAGGTGCGGGAACTGGGTGAACTGTATACCCCCCGTTGAGTGGGCCTATGGGCCACGGAGGTGCATCTGTTGATCTAGTTATTTTTTCTTTACATCTTGCTGGTATATCATCTATTCTAGGGGCTATTAATTTTATTACCACTATTTTTAATATACGATCACCCGGGATAAAGATAGAACGAGTAAATCTGTTTGTTTGGTCTATCTTGGTTACCGTATTTTTATTACTCTTGTCC---------------------------------------------------------------------------------------------------------------
>Seq34_[organism=Laspionchis_boucheti]_[isolate=2019_100]
----------------TTCGGTGTCTGGTGTGGGTTAGTAGGAACCGGTCTTTCCCTTCTTATTCGTTTTGAGTTAGGGACGGCCGGAGTCCTTCTT---GATGACCATTTTTATAATGTCATTGTGACCGCTCACGCTTTTGTTATAATTTTCTTTATAGTTATGCCCTTAATGATTGGAGGATTTGGGAACTGGATAGTTCCCTTACTAATTGGGGCTCCTGATATAAGTTTTCCTCGGATAAATAATATAAGGTTTTGACTTCTTCCTCCGTCTTTTATTCTTTTAATTGTTTCAAGCCTAGTAGAAGGTGGTGCGGGGACAGGTTGAACAGTTTACCCTCCTTTAAGAGGCCCTACTGGTCACGCTGGAGCTTCAGTTGATCTAGTAATTTTTTCTCTTCACTTGGCCGGGATATCTTCTATTTTAGGAGCTATTAACTTCATTACTACTATTTTTAACATACGCTCTCCTGGTATAACAATAGAACGAGTAAATCTTTTTGTTTGATCAATTTTAGTTACTGTGTTTTTGCTTCTTCTATCTCTCCCAGTATTGGCCGGAGCAATTACCATGCTTTTAACTGATCGAAATTTTAATACCAGGTTTTTTG--------------------------------------------
>Seq35_[organism=Laspionchis_boucheti]_[isolate=2019_122.160]
-----------------------------GTGGGTTAGTAGGAACCGGTCTTTCCCTTCTTATTCGTTTTGAGTTAGGGACGGTCGGAGTTCTTCTT---GATGACCATTTTTATAATGTCATTGTGACGGCTCACGCTTTTGTTATAATTTTCTTTATAGTTATGCCCTTAATGATTGGAGGATTTGGAAACTGGATAGTTCCCTTACTAATTGGGGCTCCTGATATAAGTTTTCCTCGGATAAATAATATAAGGTTTTGACTTCTTCCTCCGTCTTTTATTCTTTTAATTGTTTCAAGCCTAGTAGAAGGTGGTGCTGGGACAGGTTGAACAGTTTACCCTCCTTTAAGAGGCCCTACTGGTCACGCTGGAGCTTCAGTTGATCTAGTAATTTTTTCTCTTCACTTGGCCGGGATATCTTCTATTTTAGGAGCTATTAACTTCATTACTACTATTTTTAACATACGCTCTCCTGGTATAACAATAGAACGAGTAAATCTTTTTGTTTGATCAATTTTAGTTACTGTGTTTTTGCTTCTTCTATCTCTCCCAGTATTGGCCGGAGCAATTACCATGCTTTTAACTGATCGAAATTTTAATACCAGGTTTTTTGATCCTGCAGGTGGGG-----------------------------
>Seq36_[organism=Laspionchis_boucheti]_[isolate=2019_134.172]
AACACCGTATATAATCTTCGGTGTCTGGTGTGGGTTAGTAGGAACCGGTCTTTCCCTTCTTATTCGTTTTGAGTTAGGGACGGCTGGAGTTCTTCTT---GATGACCATTTTTATAATGTCATTGTGACGGCTCACGCTTTTGTTATAATTTTCTTTATAGTTATACCCTTAATGATTGGAGGATTTGGGAACTGGATAGTTCCCTTACTAATTGGGGCTCCTGATATAAGTTTTCCTCGGATAAATAATATAAGGTTTTGACTTCTTCCTCCGTCTTTTATTCTTTTAATTGTTTCAAGCCTAGTAGAAGGCGGTGCTGGGACAGGTTGAACAGTTTACCCCCCTTTAAGAGGCCCTACTGGTCACGCTGGAGCTTCAGTTGATCTAGTAATTTTTTCTCTTCACTTGGCCGGGATATCTTCTATTTTAGGAGCTATTAACTTCATTACTACTATTTTTAACATACGCTCTCCTGGTATAACAATAGAACGAGTAAATCTTTTTGTTTGATCAATTTTAGTTACTGTGTTTTTGCTTCTTCTATCTCTCCCAGTATTGGCCGGAGCAATTACCATGCTTTTAACTGATCGAAATTTTAATACCAGGTTTTTTGATCCTGCAGGTGGGG-----------------------------
>Seq37_[organism=Laspionchis_boucheti]_[isolate=2019_135.173]
--------------------------GGTGTGGGTTAGTAGGAACCGGTCTTTCCCTTCTTATTCGTTTTGAGTTAGGGACGGCCGGAGTTCTTCTT---GATGACCATTTTTATAATGTCATTGTGACGGCTCACGCTTTTGTTATAATTTTCTTTATAGTTATGCCCTTAATGATTGGAGGATTTGGGAACTGGATAGTTCCCTTACTAATTGGGGCTCCTGATATAAGTTTTCCTCGGATAAATAATATAAGGTTTTGACTTCTTCCTCCGTCTTTTATTCTTTTAATTGTTTCAAGCCTAGTAGAAGGTGGTGCTGGGACAGGTTGAACAGTTTACCCTCCTTTAAGAGGCCCTACTGGTCACGCTGGAGCTTCAGTTGATCTAGTAATTTTTTCTCTTCACTTGGCCGGGATATCTTCTATTTTAGGAGCTATTAACTTCATTACTACTATTTTTAACATACGCTCTCCTGGTATAACAATAGAACGAGTAAATCTTTTTGTTTGATCAATTTTAGTTACTGTGTTTTTGCTTCTTCTATCTCTCCCAGTATTGGCCGGAGCAATTACCATGCTTTTAACTGATCGAAATTTTAATACCAGGTTTTTTGATCCTGCAGGTGGGG-----------------------------
>Seq38_[organism=Laspionchis_boucheti]_[isolate=2019_151.189]
----------------------------TGTGGGTTAGTAGGAACCGGTCTTTCCCTTCTTATTCGTTTTGAGTTAGGGACGGCCGGAGTTCTTCTT---GATGACCATTTTTATAATGTCATTGTGACGGCTCACGCTTTTGTTATAATTTTCTTTATAGTTATGCCCTTAATGATTGGAGGATTTGGGAACTGGATAGTTCCCTTACTAATTGGGGCTCCTGATATAAGTTTTCCTCGGATAAATAATATAAGGTTTTGACTTCTTCCTCCGTCTTTTATTCTTTTAATTGTTTCAAGCCTAGTAGAAGGTGGTGCTGGGACAGGTTGAACAGTTTACCCTCCTTTAAGAGGCCCTACTGGTCACGCTGGAGCTTCAGTTGATCTAGTAATTTTTTCTCTTCACTTGGCCGGGATATCTTCTATTTTAGGAGCTATTAACTTCATTACTACTATTTTTAACATACGCTCTCCTGGTATAACAATAGAACGAGTAAATCTTTTTGTTTGATCAATTTTAGTTACTGTGTTTTTGCTTCTTCTATCTCTCCCAGTATTGGCCGGAGCAATTACCATGCTTTTAACTGATCGAAATTTTAATACCAGGTTTTTTGATCCTGCAGGTGGGGGTGATCCTATTCTATACCAACATCTGTTT
>Seq39_[organism=Laspionchis_boucheti]_[isolate=2019_70.110]
----------------------------------------------GGTCTTTCCCTTCTTATTCGTTTTGAGTTAGGGACGGCCGGAGTTCTTCTT---GATGACCATTTTTATAATGTCATTGTGACGGCTCACGCTTTTGTTATAATTTTCTTTATAGTTATGCCCTTAATGATTGGAGGATTTGGGAACTGGATAGTTCCCTTACTAATTGGGGCTCCTGATATAAGTTTTCCTCGGATAAATAATATAAGGTTTTGACTTCTTCCTCCGTCTTTTATTCTTTTAATTGTTTCAAGCCTAGTAGAAGGTGGTGCTGGGACAGGTTGAACAGTTTACCCTCCTTTAAGAGGCCCTACTGGTCACGCTGGAGCTTCAGTTGATCTAGTAATTTTTTCTCTTCACTTGGCCGGGATATCCTCTATTTTAGGAGCTATTAACTTCATTACTACTATTTTTAACATACGCTCTCCTGGTATAACAATAGAACGAGTAAATCTTTTTGTTTGATCAATTTTAGTTACTGTGTTTTTGCTTCTTCTATCTCTCCCAGTATTGGCCGGAGCAATTACCATGCTTTTAACTGATCGAAATTTTAATACCAGGTTTTTTGATCCTGCAGGTGGG------------------------------
>Seq40_[organism=Laspionchis_boucheti]_[isolate=2019_71.111]
------------------------------------------------TCTTTCCCTTCTTATTCGTTTTGAGTTAGGGACGGCCGGAGTTCTTCTT---GATGACCATTTTTATAATGTCATTGTGACGGCTCACGCTTTTGTTATAATTTTCTTTATAGTTATGCCCTTAATGATTGGAGGATTTGGGAACTGGATAGTTCCCTTACTAATTGGGGCTCCTGATATAAGTTTTCCTCGGATAAATAATATAAGGTTTTGACTTCTTCCTCCGTCTTTTATTCTTTTAATTGTTTCAAGCCTAGTAGAAGGTGGTGCTGGGACAGGTTGAACAGTTTACCCTCCTTTAAGAGGCCCTACTGGTCACGCTGGAGCTTCAGTTGATCTAGTAATTTTTTCTCTTCACTTGGCCGGGATATCTTCTATTTTAGGAGCTATTAACTTCATTACTACTATTTTTAACATACGCTCTCCTGGTATAACAATAGAACGAGTAAATCTTTTTGTTTGATCAATTTTAGTTACTGTGTTTTTGCTTCTTCTATCTCTCCCAGTATT----------------------------------------------------------------------------------------------------
>Seq41_[organism=Laspionchis_boucheti]_[isolate=TC18]
AACACTGTATATAATTTTCGGTGTCTGGTGTGGGTTAGTAGGAACCGGTCTTTCCCTTCTTATTCGTTTTGAGTTAGGGACGGCCGGAGTTCTTCTT---GATGACCATTTTTATAATGTCATTGTGACGGCTCACGCTTTTGTTATAATTTTCTTTATAGTTATGCCCTTAATGATTGGAGGATTTGGGAACTGGATAGTTCCCTTACTAATTGGGGCTCCTGATATAAGTTTTCCTCGGATGAATAATATAAGGTTTTGACTTCTTCCTCCGTCTTTTATTCTTTTAATTGTTTCAAGCCTAGTAGAAGGTGGTGCTGGGACAGGTTGAACAGTTTACCCTCCTTTAAGAGGCCCTACTGGTCACGCTGGAGCTTCAGTTGATCTAGTAATTTTTTCTCTTCACTTGGCCGGGATATCTTCTATTTTAGGAGCTATTAACTTCATTACTACTATTTTTAACATACGCTCTCCTGGTATAACAATAGAACGAGTAAATCTTTTTGTTTGATCAATTTTAGTTACTGTGTTTTTGCTTCTTCTATCTCTCCCAGTATTGGCCGGAGCAATTACCATGCTTTTAACTGATCGAAATTTTAATACCAGGTTTTTTGATCCTGCAGGTGGGGGTGATCCTATTCTATACCAACATCTGTTT
>Seq42_[organism=Laspionchis_boucheti]_[isolate=TC19]
---------------------------------GTTAGTAGGAACCGGTCTTTCCCTTCTTATTCGTTTTGAGTTAGGGACGGCCGGAGTTCTTCTT---GATGACCATTTTTATAATGTCATTGTGACGGCTCACGCTTTTGTTATAATTTTCTTTATAGTTATGCCCTTAATGATTGGAGGATTTGGGAACTGGATAGTTCCCTTACTAATTGGGGCTCCTGATATAAGTTTTCCTCGGATAAATAATATAAGGTTTTGACTTCTTCCTCCGTCTTTTATTCTTTTAATTGTTTCAAGCCTAGTAGAAGGTGGTGCTGGGACAGGTTGAACAGTTTACCCTCCTTTAAGAGGCCCTACTGGTCACGCTGGAGCTTCAGTTGATCTAGTAATTTTTTCTCTTCACTTGGCCGGGATATCCTCTATTTTAGGAGCTATTAACTTCATTACTACTATTTTTAACATACGCTCTCCTGGTATAACAATAGAACGAGTAAATCTTTTTGTTTGATCAATTTTAGTTACTGTGTTTTTGCTTCTTCTATCTCTCCCAGTATTGGCCGGAGCAATTACCATGCTTTTAACTGATCGAAATTTTAATACCAGGTTTTTTGATCCTGCAGGTGGGGGTGATCCTATTCTATTCCAAC--------
>Seq43_[organism=Littoraria_ardouiniana]_[isolate=2019_31.73]
-----------------------------CTGGTCTAGTCGGTACAGCTTTAAGTCTTCTTATTCGAGCTGAATTAGGACAACCAGGGGCTCTATTGGGAGACGATCAGCTTTATAATGTTATTGTAACAGCTCATGCATTCGTTATAATCTTTTTCTTAGTTATACCAATAATGATTGGAGGATTCGGAAATTGATTAGTCCCTTTAATGTTAGGTGCACCCGACATGGCATTTCCTCGACTAAATAACATGAGATTCTGACTTCTTCCTCCAGCACTTTTACTCCTACTCTCTTCAGCCGCAGTTGAAAGTGGCGTAGGAACCGGATGAACCGTCTATCCTCCTCTTGCAGGTAACCTGGCTCACGCCGGGGGCTCTGTAGATCTAGCAATCTTTTCACTTCACTTAGCCGGTGTATCCTCTATTTTAGGAGCTGTAAACTTCATTACAACTATTATCAACATACGATGACGAGGCATGCAATTTGAGCGCCTACCTCTCTTTGTTTGATCAGTAAAAATTACAGCCATTCTCCTACTTCTATCTCTCCCAGTCTTAGCTGGTGCAATTACAATACTTTTAACGGATCGAAACTTCAACACTGCCTTCTTTGACCCTGCCGGGGGAGGTGATCCTATTCTTTATCAACACCTATTT
>Seq44_[organism=Littoraria_ardouiniana]_[isolate=2019_32.74]
--------------------------------------TCGGTGCAGCTTTAAGTCTTCTTATTCGAGCTGAATTAGGACAACCAGGGGCTCTATTGGGAGACGATCAGCTTTATAATGTTATTGTAACAGCTCATGCATTCGTTATAATCTTTTTCTTAGTTATACCAATAATGATTGGAGGATTCGGAAATTGATTAGTCCCTTTAATGTTAGGTGCACCCGACATGGCATTTCCTCGACTAAATAACATGAGATTCTGACTTCTTCCTCCAGCACTTTTACTCCTACTCTCTTCAGCCGCAGTTGAAAGTGGCGTAGGAACCGGATGAACCGTCTATCCTCCTCTTGCAGGTAACCTGGCTCACGCCGGGGGCTCTGTAGATCTAGCAATCTTTTCACTTCACTTAGCCGGTGTATCCTCTATTTTAGGAGCTGTAAACTTCATTACAACTATTATCAACATACGATGACGAGGCATGCAATTTGAGCGCCTACCTCTCTTTGTTTGATCAGTAAAAATTACAGCCATTCTCCTACTTCTATCTCTCCCAGTCTTAGCTGGTGCAATTACAATACTTTTAACGGATCGAAACTTCAACACTGCCTTCTTTGACCT
----------------------------------------
>Seq45_[organism=Littoraria_ardouiniana]_[isolate=2019_54.95]
-------------------------------GGTCTAGTCGGTACAGCTTTAAGTCTTCTTATTCGAGCTGAATTAGGACAACCAGGGGCTCTATTGGGAGACGATCAGCTTTATAATGTTATTGTAACAGCTCATGCATTCGTTATAATCTTTTTCTTAGTTATACCAATAATGATTGGAGGATTCGGAAATTGATTAGTCCCTTTAATGTTAGGTGCACCCGACATGGCATTTCCTCGACTAAATAACATGAGATTCTGACTTCTTCCTCCAGCACTTTTACTCCTACTCTCTTCAGCCGCAGTTGAAAGTGGCGTAGGAACCGGATGAACCGTCTATCCTCCTCTTGCAGGTAACCTGGCTCACGCCGGGGCCTCTGTAGATCTAGCAATCTTTTCACTTCACTTAGCCGGTGTATCCTCTATTTTAGGAGCTGTAAACTTCATTACAACTATTATCAACATACGATGACGAGGCATGCAATTTGAGCGCCTACCTCTCTTTGTTTGATCAGTAAAAATTACAGCCATTCTCCTACTTCTATCTCTCCCAGTCTTAGCTGGTGCAATTACAATACTTTTAACGGATCGAAACTTCAACACTGCCTTCTTTGACCCTGCCGGGGGAGGTGATCCTATTCTTTATCAACACCTATTT
>Seq46_[organism=Littoraria_articulata]_[isolate=2019_38.80]
AACATTGTATATTCTATTTGGTATATGATCAGGACTCGTAGGTACCGCCTTAAGCCTCTTAATTCGAGCCGAATTAGGACAGCCCGGAGCTCTTCTAGGAGACGATCAATTATATAACGTTATTGTTACAGCCCATGCATTCGTTATAATTTTTTTTCTAGTTATGCCTATAATAATTGGAGGTTTTGGAAATTGGTTAGTCCCCTTAATATTAGGTGCACCCGATATAGCATTTCCTCGATTAAATAATATAAGCTTCTGACTTCTCCCTCCAGCCCTCCTTCTTTTGCTCTCTTCAGCTGCAGTAGAAAGCGGTGTTGGAACCGGATGAACAGTCTATCCTCCCCTTGCAGGTAACTTGGCTCACGCTGGTGGGTCTGTAGACTTAGCAATTTTTTCTCTACACCTAGCCGGTGTCTCTTCTATTTTAGGAGCCGTAAATTTTATTACAACTATTATTAATATACGATGACGAGGCATGCAATTTGAACGCCTACCTCTTTTCGTTTGATCAGTAAAAATTACAGCTATTCTCCTTCTTCTATCTCTCCCAGTTTTAGCTGGTGCAATTACTATGCTTCTTACTGACCGAAATTTTAATACTGCATTCTTTGATCCAGCAGGAGGAGGGGACCCTATTCTTTATCAACATCTATTT
>Seq47_[organism=Littoraria_articulata]_[isolate=2019_102.140]
AACATTGTATATTCTATTTGGTATATGATCAGGACTCGTAGGTACCGCCTTAAGCCTCTTAATTCGAGCCGAATTAGGACAGCCCGGAGCTCTTCTAGGAGACGATCAATTATATAACGTTATTGTTACAGCCCATGCATTCGTTATAATTTTTTTTCTAGTTATGCCTATAATAATTGGAGGTTTTGGAAATTGGTTAGTCCCCTTAATATTAGGTGCACCCGATATAGCATTTCCTCGATTAAATAATATAAGCTTCTGACTTCTCCCTCCAGCCCTCCTTCTTTTGCTCTCTTCAGCTGCAGTAGAAAGCGGTGTTGGAACCGGATGAACAGTCTATCCTCCCCTTGCAGGTAACTTGGCTCACGCTGGTGGGTCTGTAGACTTAGCAATTTTTTCTCTACACCTAGCCGGTGTCTCTTCTATTTTAGGAGCCGTAAATTTTATTACAACTATTATTAATATACGATGACGAGGCATGCAATTTGAACGCCTACCTCTTTTCGTTTGATCAGTAAAAATTACAGCTATTCTCCTTCTTCTATCTCTCCCAGTTTTAGCTGGTGCAATTACTATGCTTCTTACTGACCGAAATTTTAATACTGCATTCTTTGATCCAGCAGGAGGAGGGGACCCTATTCTTTATCAACATCTATTT
>Seq48_[organism=Littoraria_articulata]_[isolate=2019_46.18]
-------------------------------------GTAGGTACCGCCTTAAGCCTCTTAATTCGAGCCGAATTAGGACAGCCCGGAGCTCTTCTAGGAGACGATCAATTATATAACGTTATTGTTACAGCCCATGCATTCGTTATAATTTTTTTTCTAGTTATGCCTATAATAATTGGAGGTTTTGGAAATTGGTTAGTCCCCTTAATATTAGGTGCACCCGATATAGCATTTCCTCGATTAAATAATATAAGCTTCTGACTTCTCCCTCCAGCCCTCCTTCTTTTGCTCTCTTCAGCTGCAGTAGAAAGCGGTGTTGGAACCGGATGAACAGTCTATCCTCCCCTTGCAGGTAACTTGGCTCACGCTGGTGGGTCTGTAGACTTAGCAATTTTTTCTCTACACCTAGCCGGTGTCTCTTCTATTTTAGGAGCCGTAAATTTTATTACAACTATTATTAATATACGATGACGAGGCATGCAATTTGAACGCCTACCTCTTTTCGTTTGATCAGTAAAAATTACAGCTATTCTCCTTCTTCTATCTCTCCCAGTTTTAGCTGGTGCAACTACTATGCTTCTTACTGACCGAAATTTTAATACTGCATTCTTTGATCCAGCAGGAGGAGGGGACCCTATTCTTTATCAACATCTATTT
>Seq49_[organism=Littoraria_melanostoma]_[isolate=2019_37.79]
-------------------------------------------------------------------------------------GGGGCTCTCTTAGGAGACGATCAACTGTATAACGTTATTGTTACAGCCCATGCATTTGTTATAATTTTTTTTCTAGTTATACCAATGATAATTGGAGGCTTCGGAAATTGATTGGTCCCCCTAATACTAGGTGCGCCCGATATAGCATTTCCTCGATTAAATAATATAAGCTTCTGACTTCTTCCTCCAGCATTACTTCTTTTACTCTCTTCAGCTGCAGTAGAAAGTGGCGTTGGAACAGGATGGACAGTTTACCCTCCCCTGGCAGGAAACTTGGCCCATGCTGGTGGATCTGTAGACTTAGCAATTTTCTCCTTACACCTAGCTGGTGTATCCTCTATTTTGGGGGCTGTAAATTTTATTACAACTATTATCAATATACGATGACGAGGTATGCAATTTGAACGTCTACCTCTTTTCGTTTGATCAGTAAAAATTACAGCTATTCTCCTTCTTCTATCCCTTCCAGTTTTAGCTGGTGCAATTACTATACTTCTTACTGACCGAAATTTTAATACTGCATTCTTTGATCCAGCAGGAGGTGGAGACCCTATTCTCTATCAACATCTATTT
>Seq50_[organism=Littoraria_sinensis]_[isolate=2019_40.82]
AACATTATATATTTTATTTGGCATATGATCAGGACTCGTAGGTACAGCTTTAAGCCTCTTAATTCGAGCTGAATTAGGGCAACCTGGGGCTCTCCTAGGAGACGATCAACTATATAACGTTATTGTTACAGCCCATGCATTCGTTATAATTTTTTTCCTAGTTATACCCATGATAATTGGCGGCTTCGGAAATTGACTTGTCCCTCTAATATTAGGTGCGCCCGATATAGCGTTCCCCCGATTAAACAATATAAGTTTCTGACTTCTTCCTCCGGCCTTACTTCTTTTACTTTCTTCAGCTGCGGTAGAAAGGGGTGTTGGAACCGGATGAACAGTTTATCCTCCCCTTGCAGGTAACTTAGCTCATGCTGGTGGCTCTGTAGACTTAGCAATTTTCTCTTTACACCTTGCTGGTGTCTCTTCTATTTTAGGAGCTGTAAATTTTATTACAACTATCATTAACATACGATGACGAGGCATGCAATTTGAACGTTTACCTCTTTTCGTTTGATCAGTAAAAATTACAGCCATTCTCCTTCTTCTATCCCTTCCAGTTCTAGCTGGTGCAATTACTATACTTCTTACCGACCGAAATTTTAATACTGCATTCTTTGACCCTGCAGGAGGTGGAGACCCTATTCTTTATCAACATCTATTT
>Seq51_[organism=Lunella_granulata]_[isolate=2020_19]
GACATTATATCTAATTTTAGGAATTTGATCTGGGCTGGTTGGAACTGCTTTGAGTCTTTTGATTCGGGCTGAACTGGGACAACCGGGTGCTTTGTTAGGTGATGATCAGCTGTATAATGTAATTGTCACTGCTCATGCTTTTGTAATAATTTTTTTTCTGGTGATGCCTCTTATGATTGGAGGGTTTGGAAATTGACTTATTCCTTTAATGTTAGGGGCTCCAGATATAGCGTTTCCTCGACTTAATAATATGAGATTTTGGTTACTTCCACCTTCTTTAACTTTACTTCTAACTTCGGCTGCAGTTGAGAGTGGAGCTGGGACAGGGTGGACTGTTTACCCGCCTTTAGCTGGTAATTTAGCTCATGCCGGGGCTTCTGTAGATTTAGCAATTTTTTCTCTTCATCTTGCTGGTATTTCTTCTATTTTGGGGGCTGTTAATTTTATCACTACTGTAATTAATATGCGATGACAGGGGATAAAATTTGAACGATTGCCTTTATTTGTGTGGTCAGTAAAAATTACAGCTATTTTGCTTCTTCTGTCCCTTCCAGTTTTAGCTGGTGCTATTACAATACTTTTGACTGATCGGAATTTTAATACTTCTTTTTTTGATCCTGCTGGTGGGGGGGATCCCATTTTATACCAGCACTTGTTT
>Seq52_[organism=Lunella_granulata]_[isolate=TC01]
GACATTATATCTAATTTTAGGAATTTGATCTGGGCTGGTTGGAACTGCTTTGAGTCTTTTGATTCGGGCTGAACTGGGACAACCGGGTGCTTTGTTAGGTGATGATCAGCTGTATAATGTAATTGTCACTGCTCATGCTTTTGTAATAATTTTTTTTCTGGTGATGCCTCTTATGATTGGAGGGTTTGGAAATTGACTTATTCCTTTAATGTTAGGGGCTCCAGATATAGCGTTTCCTCGACTTAATAATATGAGATTTTGGTTACTTCCACCTTCTTTAACTTTACTTCTAACTTCGGCTGCAGTTGAGAGTGGAGCTGGGACAGGGTGGACTGTTTATCCGCCTTTAGCTGGTAATTTAGCTCATGCCGGGGCTTCTGTAGATTTAGCAATTTTTTCTCTTCATCTTGCTGGTATTTCTTCTATTTTGGGGGCTGTTAATTTTATCACTACTGTAATTAATATGCGATGACAGGGGATAAAATTTGAACGATTGCCTTTATTTGTGTGGTCAGTAAAAATTACAGCTATTTTGCTTCTTCTGTCCCTTCCAGTTTTAGCTGGTGCTATTACAATACTTTTGACTGATCGGAATTTTAATACTTCTTTTTTTGATCCTGCTGGTGGGGGGGATCC----------------------
>Seq53_[organism=Monodonta_labio]_[isolate=2020_15]
AACTCTTTATCTAATTTTCGGAATTTGATCTGGTCTAGTCGGAACTGCCCTTAGTCTCCTAATCCGAGCTGAGCTTGGGCAGCCGGGTGCCCTCCTTGGAGACGACCAGCTTTACAACGTAATCGTTACCGCTCACGCATTTGTTATAATTTTCTTTTTAGTTATGCCCCTGATAATTGGGGGATTCGGAAACTGACTAATTCCTCTTATGCTCGGAGCCCCCGACATGGCTTTCCCTCGCCTAAATAATATAAGCTTTTGGCTACTCCCACCTTCTTTAACTTTACTCCTGGCATCCTCTGCAGTAGAGAGGGGAGTTGGGACCGGATGAACTGTCTATCCCCCTCTTTCCAGAAATTTAGCCCATGCCGGGGCATCTGTTGACCTAGCTATTTTCTCCCTTCACTTAGCCGGGGTTTCTTCTATTTTAGGGGCAGCAAACTTCATCACCACAGTTATTAACATACGCTGACAAGGAATGAAGTTCGAACGGCTCCCTCTATTCGTTTGATCTGTGAAAATTACTGCTATTTTACTTCTTCTATCTCTCCCAGTTTTAGCAGGAGCCATCACAATGCTTCTTACAGATCGAAACTTCAATACGTCATTTTTTGACCCTGCTGGAGGAGGAGACCCTATTTTATACCAGCACCTATTC
>Seq54_[organism=Monodonta_labio]_[isolate=2020_16]
AACTCTTTATATAATTTTCGGAATTTGATCTGGTCTAGTCGGAACTGCCCTTAGTCTCCTAATCCGAGCTGAGCTTGGGCAGCCGGGTGCCCTCCTTGGAGACGACCAGCTTTACAACGTAATCGTTACCGCTCACGCATTTGTTATAATTTTCTTTTTAGTTATGCCCCTGATAATTGGAGGATTCGGAAACTGACTAATTCCTCTTATGCTCGGAGCCCCCGACATGGCTTTCCCTCGCCTAAATAATATAAGCTTTTGGCTACTCCCACCTTCTTTAACTTTACTCCTGGCATCCTCTGCAGTAGAGAGGGGAGTTGGGACCGGATGAACTGTCTATCCCCCTCTTTCCAGAAATTTAGCCCATGCCGGGGCATCTGTTGACCTAGCTATTTTCTCCCTTCACTTAGCCGGGGTTTCTTCTATTTTAGGGGCAGCAAACTTCATCACCACAGTTATTAACATACGCTGACAAGGAATGAAGTTCGAACGGCTCCCTCTATTCGTTTGATCTGTGAAAATTACTGCTATTTTACTTCTTCTATCTCTCCCAGTTTTAGCAGGAGCCATCACAATGCTTCTTACAGATCGAAACTTCAATACGTCATTTTTTGACCCTGCTGGAGGAGGAGACCCTATTTTATACCAGCACCTATTC
>Seq55_[organism=Nassarius_sinarum]_[isolate=TC12]
AACATTGTATATTTTATTTGGAATATGATCAGGACTGGTTGGTACGGCTTTAAGACTTTTAATTCGTGCTGAACTTGGTCAACCTGGAGCACTATTGGGTGATGACCAACTTTATAATGTAATTGTTACAGCTCATGCTTTTGTTATAATTTTCTTTTTAGTTATGCCAATGATAATTGGGGGATTTGGAAATTGACTAGTGCCTTTAATGTTAGGGGCTCCTGATATAGCTTTTCCCCGTTTAAATAATATAAGATTCTGATTACTTCCTCCTGCTTTGTTACTTTTATTATCGTCAGCAGCTGTAGAAAGGGGAGCAGGAACTGGATGAACAGTTTATCCTCCGCTAGCGGGTAATCTGGCACATGCCGGAGGTTCAGTTGATTTAGCTATTTTCTCCCTTCATTTAGCAGGTGTCTCTTCTATTTTAGGTGCTGTAAATTTTATTACGACTATTATTAACATACGATGGCGGGGAATACAATTTGAGCGTCTTCCATTATTTGTGTGGTCTGTAAAGATTACTGCCATTCTATTACTTTTATCACTTCCTGTTCTAGCAGGAGCTATTACAATACTTTTAACTGATCGAAATTTTAATACGGCTTTCTTTGACCCAGCCGGTGGTGGAAATCCAATTCTATACCAACACCC----
>Seq56_[organism=Neripteron_cornucopia]_[isolate=2019_156.94]
-----------------------------CTGGTCTTGTGGGGACTGCTCTTAGTTTACTAATTCGGGCTGAACTTGGTCAGCCTGGGGCTTTGCTAGGGGATGATCAGCTTTATAATGTAATTGTAACTGCTCATGCATTTGTAATAATTTTCTTTTTGGTTATGCCAATGATAATTGGTGGCTTTGGTAATTGACTAGTTCCTCTGATACTAGGGGCTCCTGATATGGCTTTCCCTCGATTAAATAATATAAGTTTTTGACTTTTGCCTCCATCATTAACTCTGCTATTGGCCTCATCTGCCGTTGAAAGTGGGGTAGGGACAGGTTGAACAGTTTATCCTCCACTCTCTGGTAATCTGGCTCATGCTGGTGGATCTGTTGACTTAGCTATTTTTTCATTGCATTTAGCTGGTGTTTCATCAATTTTAGGTGCTGTAAATTTCATTACTACAATTATCAATATGCGATGACAAGGTATGCAATTTGAGCGACTTCCTTTGTTTGTGTGGTCTGTTAAAATTACTGCAATTTTGTTGTTGCTTTCTCTTCCTGTGTTGGCAGGAGCAATTACTATGCTATTAACTGATCGAAATTTCAATACTTCATTTTTCGATCCAGCCGGGGGT------------------------------
>Seq57_[organism=Neripteron_violaceum]_[isolate=2019_162]
TACTTTGTATATTATGTTTGGTGTTTGATCTGGTCTTGTAGGGACTGCTCTTAGTTTATTGATTCGGGCTGAGCTTGGTCAGCCTGGGGCTTTGCTAGGGGATGATCAGCTTTATAATGTAATTGTAACTGCTCATGCATTTGTAATAATTTTCTTTTTGGTTATGCCAATGATAATTGGTGGCTTTGGTAACTGATTGGTTCCTTTAATGCTAGGGGCTCCTGATATGGCTTTCCCTCGACTAAATAATATAAGTTTTTGACTTCTTCCCCCATCATTAACTTTGTTGTTGGCTTCGTCTGCTGTCGAAAGTGGAGTTGGTACAGGTTGAACAGTGTACCCACCACTTTCTGGTAATTTAGCTCATGCGGGGGGATCTGTTGATTTAGCTATTTTTTCTTTGCATTTGGCTGGTGTTTCGTCGATTTTAGGTGCTGTAAATTTTATTACTACAATTATTAATATGCGATGACAAGGAATGCAATTTGAGCGACTTCCCCTTTTTGTGTGGTCTGTTAAGATTACTGCAATTTTGTTATTACTTTCTCTTCCTGTATTGGCAGGAGCAATTACTATGCTACTAACTGATCGAAATTTTAATACTTCATTTTTTGACCCAGCTGGAGG-------------------------------
>Seq58_[organism=Neripteron_violaceum]_[isolate=2019_59.100]
TACTTTGTATATTATGTTTGGTGTTTGATCTGGTCTTGTAGGGACTGCTCTTAGTTTATTGATTCGGGCTGAGCTTGGTCAGCCTGGGGCTTTGCTAGGGGATGATCAGCTTTATAATGTAATTGTAACTGCTCATGCATTTGTAATAATTTTCTTTTTGGTTATGCCAATGATAATTGGTGGCTTTGGTAACTGATTGGTTCCTTTAATGCTAGGGGCTCCTGATATGGCTTTCCCTCGATTAAATAATATAAGTTTTTGACTTCTTCCCCCATCATTAACTTTGTTGTTGGCTTCGTCTGCTGTCGAAAGTGGAGTTGGTACAGGTTGAACAGTGTATCCACCACTTTCTGGTAATTTAGCTCATGCGGGGGGATCTGTTGATTTAGCTATTTTTTCTTTGCATTTGGCTGGTGTTTCGTCGATTTTAGGTGCTGTAAATTTTATTACTACAATTATTAATATGCGATGACAAGGAATGCAATTTGAGCGACTTCCCCTTTTTGTGTGGTCTGTTAAGATTACTGCAATTTTGTTATTACTTTCTCTTCCTGTATTGGCAGGAGCAATTACTATGCTACTAACTGATCGAAATTTTAATACTTCATTTTTTGACCCAGCTGGAGGTGGGGATCCAATCCTTTATCAACACTTGTT
>Seq59_[organism=Nerita_balteata]_[isolate=2019_107]
---TTTGTATATTATGTTTGGTGTGTGATCTGGTTTAGTCGGGACTGCTTTGAGACTTTTGATTCGAGCTGAGCTTGGCCAGCCAGGGGCTCTTTTGGGTGATGACCAGTTGTATAATGTAATTGTTACTGCTCATGCGTTTGTGATAATTTTCTTTTTGGTGATGCCTATGATGATTGGGGGATTTGGTAATTGATTAGTTCCTTTGATGCTAGGTGCTCCTGACATGGCGTTTCCTCGGTTGAATAATATGAGTTTTTGGCTGCTTCCACCTTCGTTAACTTTATTGCTTGCTTCTTCTGCTGTTGAAAGCGGAGTGGGAACGGGTTGAACGGTTTATCCTCCTTTATCCGGGAATCTAGCTCATGCAGGAGGTTCTGTGGATTTGGCTATTTTTTCGTTACATTTAGCTGGTGTATCTTCTATTTTAGGTGCTGTAAATTTTATTACTACAATTATTAATATGCGGTGGCAAGGGATGCAATTTGAGCGATTGCCTCTTTTTGTTTGATCAGTGAAGATTACTGCTATTCTTTTGTTGTTGTCTTTACCTGTTCTTGCTGGTGCAATTACTATGTTGTTAACTGATCGAAATTTCAATACGTCTTTTTTTGACCCTGCTGGAGGTGGGGATCCTATTTTGTATCAACATTTGTTT
>Seq60_[organism=Nerita_planospira]_[isolate=2019_56.97]
-----------------------------CTGGTTTAGTTGGGACTGCTCTTAGATTGTTGATTCGAGCAGAGCTCGGGCAGCCAGGTGCTCTTTTGGGTGATGATCAGCTTTACAATGTAATTGTTACTGCTCATGCTTTTGTGATAATTTTTTTTCTGGTAATGCCTATGATGATTGGTGGGTTCGGTAACTGACTGGTGCCTTTGATGTTGGGAGCTCCTGATATGGCTTTTCCTCGTCTTAATAATATGAGTTTTTGATTATTGCCACCTTCATTAACTTTGTTGCTTGCTTCTTCTGCTGTTGAAAGGGGGGTTGGAACGGGTTGGACAGTTTATCCTCCTTTGTCTGGGAATTTAGCCCATGCGGGGGGTTCAGTAGATTTGGCTATTTTCTCTTTGCATTTGGCTGGTGTGTCTTCGATTTTGGGGGCTGTAAATTTTATTACTACAATCATTAATATGCGATGACAAGGAATGCAGTTTGAGCGGTTGCCACTTTTTGTGTGATCAGTGAAAATTACTGCGATCCTCCTTCTGCTTTCTTTGCCTGTACTTGCTGGTGCTATTACTATGTTGTTAACTGATCGAAATTTTAATACTTCTTTTTTT---------------------------------------------
>Seq61_[organism=Nerita_yoldii]_[isolate=2020_24]
TACTTTATATATTATGTTTGGTGTATGATCTGGTTTGGTAGGGACTGCTTTGAGTCTTTTGATTCGAGCTGAACTTGGGCAACCAGGAGCTCTTTTGGGTGATGATCAACTTTATAATGTAATTGTTACTGCTCATGCTTTTGTAATAATTTTCTTTTTGGTGATGCCTATGATGATTGGGGGATTTGGTAATTGATTAGTTCCTTTGATGCTGGGGGCTCCTGATATGGCTTTTCCTCGATTGAATAACATGAGTTTTTGGTTACTTCCACCTTCATTAACTTTATTACTTGCTTCTTCTGCTGTTGAAAGTGGTGTGGGAACGGGTTGAACAGTTTATCCTCCTTTGTCTGGGAATTTAGCTCATGCGGGTGGTTCTGTAGACTTGGCTATTTTTTCTTTACATTTAGCTGGTGTATCTTCGATTTTAGGTGCTGTAAACTTTATTACTACAATTATTAATATGCGGTGACAAGGGATGCAGTTTGAGCGATTGCCTCTTTTTGTTTGATCAGTGAAGATTACTGCTATTCTTCTTTTATTATCTTTACCTGTCCTTGCGGGTGCAATTACAATGTTATTGACTGATCGTAATTTTAATACTTCTTTCTTTGATCCTGCTGGAGGTGGTGATCCTATTCTATATCAACATTTGTTC
>Seq62_[organism=Nerita_yoldii]_[isolate=2020_26]
TACTTTATATATTATGTTTGGTGTATGATCTGGTTTGGTAGGGACTGCTTTGAGTCTTTTGATTCGAGCTGAACTTGGGCAACCAGGAGCTCTTTTGGGTGATGATCAACTTTATAATGTAATTGTTACTGCTCATGCTTTTGTAATAATTTTCTTTTTGGTGATGCCTATGATGATTGGGGGATTTGGTAATTGATTAGTTCCTTTGATGCTGGGGGCTCCTGATATGGCTTTTCCTCGATTGAATAACATGAGTTTTTGGTTACTTCCACCTTCATTAACTTTATTACTTGCTTCTTCTGCTGTTGAAAGTGGTGTGGGAACGGGTTGAACAGTTTATCCTCCTTTGTCTGGGAATTTAGCTCATGCGGGTGGTTCTGTAGACTTGGCTATTTTTTCTTTACATTTAGCTGGTGTATCTTCGATTTTAGGTGCTGTAAACTTTATTACTACAATTATTAATATGCGGTGACAAGGGATGCAGTTTGAGCGATTGCCTCTTTTTGTTTGATCAGTGAAGATTACTGCTATTCTTCTTTTATTATCTTTACCTGTCCTTGCGGGTGCAATTACAATGTTATTGACTGATCGTAATTTTAATACTTCTTTCTTTGATCCTGCTGGGGGTGGTGATCCTATTCTATATCAACATTTGTTC
>Seq63_[organism=Nerita_yoldii]_[isolate=TC05]
-TACTTTATATTTTATGTCTGGTGTATGATCTGGTTTGGTAGGGACTGCTTTGAGTCTTTTGATTCGAGCTGAACTTGGGCAACCAGGAGCTCTTTTGGGTGATGATCAACTTTATAATGTAATTGTTACTGCTCATGCTTTTGTAATAATTTTCTTTTTGGTGATGCCTATGATGATTGGGGGATTTGGTAATTGATTAGTTCCTTTGATGCTGGGGGCTCCTGATATGGCTTTTCCTCGATTGAATAACATGAGTTTTTGGTTACTTCCACCTTCATTAACTTTATTACTTGCTTCTTCTGCTGTTGAAAGTGGTGTGGGAACGGGTTGAACAGTTTATCCTCCTTTGTCTGGGAATTTAGCTCATGCGGGTGGTTCTGTAGACTTGGCTATTTTTTCTTTACATTTAGCTGGTGTATCTTCGATTTTAGGTGCTGTAAACTTTATTACTACAATTATTAATATGCGGTGACAAGGGATGCAGTTTGAGCGATTGCCTCTTTTTGTTTGATCAGTGAAGATTACTGCTATTCTTCTTTTATTATCTTTACCTGTCCTTGCGGGTGCAATTACAATGTTATTGACTGATCGTAATTTTAATACTTCTTTCTTTGATCCTGCTGGAGGTGGTGATCCTATT------------------
>Seq64_[organism=Nerita_yoldii]_[isolate=TC06]
TACTTATATTTTTATGTTTGGTGTATGATCTGGTTTGGTAGGGACTGCTTTGAGTCTTTTGATTCGAGCTGAACTTGGGCAACCAGGAGCTCTTTTGGGTGATGATCAACTTTATAATGTAATTGTTACTGCTCATGCTTTTGTAATAATTTTCTTTTTGGTGATGCCTATGATGATTGGGGGATTTGGTAATTGATTAGTTCCTTTGATGCTGGGGGCTCCTGATATGGCTTTTCCTCGATTGAATAACATGAGTTTTTGGTTACTTCCACCTTCATTAACTTTATTACTTGCTTCTTCTGCTGTTGAAAGTGGTGTGGGAACGGGTTGAACAGTTTATCCTCCTTTGTCTGGGAATTTAGCTCATGCGGGTGGTTCTGTAGACTTGGCTATTTTTTCTTTACATTTAGCTGGTGTATCTTCGATTTTAGGTGCTGTAAACTTTATTACTACAATTATTAATATGCGGTGACAAGGGATGCAGTTTGAGCGATTGCCTCTTTTTGTTTGATCAGTGAAGATTACTGCTATTCTTCTTTTATTATCTTTACCTGTCCTTGCGGGTGCAATT---------------------------------------------------------------------------------------
>Seq65_[organism=Nerita_yoldii]_[isolate=TC07]
--------------------------------------------------------------TTCGAGCTGAACTTGGGCAACCAGGAGCTCTTTTGGGTGATGATCAACTTTATAATGTAATTGTTACTGCTCATGCTTTTGTAATAATTTTCTTTTTGGTGATGCCTATGATGATTGGGGGATTTGGTAATTGATTAGTTCCTTTGATGCTGGGGGCTCCTGATATGGCTTTTCCTCGATTGAATAACATGAGTTTTTGGTTACTTCCACCTTCATTAACTTTATTACTTGCTTCTTCTGCTGTTGAAAGTGGTGTGGGAACGGGTTGAACAGTTTATCCTCCTTTGTCTGGGAATTTAGCTCATGCGGGTGGTTCTGTAGACTTGGCTATTTTTTCTTTACATTTAGCTGGTGTATCTTCGATTTTAGGTGCTGTAAACTTTATTACTACAATTATTAATATGCGGTGACAAGGGATGCAGTTTGAGCGATTGCCTCTTTTTGTTTGATCAGTGAAGATTACTGCTATTCTTCTTTTATTATCTTTACCTGTCCTTGCGGGTGCAATTACAATGTTATTGACTGATCGTAATTTTAATACTTCTTTTT-----------------------------------------------
>Seq66_[organism=Nerita_yoldii]_[isolate=TC08]
TACTTATAATATTATGTTTGGTGTATGATCTGGTTTGGTAGGGACTGCTTTGAGTCTTTTGATTCGAGCTGAACTTGGGCAGCCAGGAGCTCTTTTGGGTGATGATCAACTTTATAATGTAATTGTTACTGCTCATGCTTTTGTAATAATTTTCTTTTTGGTGATGCCTATGATGATTGGGGGATTTGGTAATTGATTAGTTCCTTTAATGCTGGGGGCTCCTGATATGGCTTTTCCTCGATTGAATAACATGAGTTTTTGGTTACTTCCACCTTCATTAACTTTATTACTTGCTTCTTCTGCTGTTGAAAGTGGTGTGGGAACGGGTTGAACAGTTTATCCTCCTTTGTCTGGGAATTTAGCTCATGCGGGTGGTTCTGTAGACTTGGCTATTTTTTCTTTACATTTAGCTGGTGTATCTTCGATTTTAGGTGCTGTAAACTTTATTACTACAATTATTAATATGCGGTGACAAGGGATGCAGTTTGAGCGATTGCCTCTTTTTGTTTGATCAGTGAAGATTACTGCTATTCTTCTTTTATTATCTTTACCTGTCCTTGCGGGTGCAATTACAATGTTATTGAATGATCGTAATTTTAATACTTCTTTCTTTGATCCTGCTGGAGGTG-----------------------------
>Seq67_[organism=Onchidium_stuxbergi]_[isolate=2020_68]
AACTTTGTATATAATTTTTGGTGTTTGGTGCGGGTTGGTTGGAACAGGGTTGTCTCTTTTAATTCGTTTTGAGTTAGGGACAGCTGGTGTGTTGCTA---GACGATCATTTTTACAATGTTATTGTGACTGCTCATGCATTTGTGATGATTTTTTTTATAGTGATGCCTTTAATAATTGGTGGTTTTGGTAATTGAATAGTGCCCCTATTAATCGGAGCTCCGGATATAAGTTTCCCTCGAATGAATAATATAAGCTTCTGGTTGCTACCTCCTTCTTTTATTCTTTTAATTGTATCAAGATTAGTGGAAGGAGGGGCAGGAACTGGGTGAACAGTTTACCCTCCGCTAAGAGGGCCGACAGGTCATGCAGGGGCTTCTGTAGATTTGGTTATTTTTTCTTTACATTTAGCTGGGATATCTTCGATTCTTGGTGCTATTAATTTTATTACTACTATCTTTAATATGCGATCTCCTGGAATAACTATAGAACGTGTTAACTTATTCGTATGATCTATTTTAGTTACTGTTTTCTTGCTCTTGCTATCACTTCCAGTGTTAGCTGGTGCTATTACAATGCTTTTAACGGATCGAAATTTTAACACAAGGTTTTTTGACCCGGCAGGTGGTGGGGATCCTATTCTATATCAACACTTGTTT
>Seq68_[organism=Optediceros_breviculum]_[isolate=2019_112]
-----------------------------CTGGCCTAGTTGGTACTGCATTAAGTTTACTTATTCGTGCTGAACTCGGTCAGCCTGGAGCTTTATTAGGTGATGATCAGCTTTATAATGTGATTGTTACAGCTCATGCTTTTGTTATAATTTTTTTTCTTGTTATACCAATGATAATTGGTGGTTTTGGGAATTGATTGGTTCCTTTAATGTTAGGTGCCCCAGATATGGCATTTCCTCGACTTAATAACATAAGTTTCTGATTACTTCCTCCTGCTTTACTGTTGCTTCTTTCTTCTGCTGCAGTAGAAAGTGGGGTTGGTACTGGGTGAACTGTTTATCCTCCTTTAGCAGGAAACTTAGCTCACGCTGGTGGTTCTGTAGATTTAGCTATTTTTTCTTTACATTTAGCTGGTGTTTCTTCTATTTTAGGTGCTGTAAATTTTATTACTACAATTATTAATATACGTTGACGTGGAATGCAATTTGAGCGATTACCATTGTTTGTTTGGTCAGTAAAAATTACTGCAGTATTACTTTTATTATCTTTACCTGTATTGGCTGGTGCTATTACTATGCTTTTAACTGATCGAAATTTTAATACTGCGTTTTTTGATCCAGCAGGGGGT------------------------------
>Seq69_[organism=Optediceros_breviculum]_[isolate=2020_65]
AACTTTATATATTTTATTTGGAATATGATCTGGCCTAGTTGGTACTGCATTAAGTTTACTTATTCGTGCTGAACTTGGTCAGCCTGGAGCTTTATTAGGTGATGATCAGCTTTATAATGTGATTGTTACAGCTCATGCTTTTGTTATAATTTTTTTTCTTGTTATACCAATGATAATTGGTGGTTTTGGGAATTGATTGGTTCCTTTAATGTTAGGTGCCCCAGATATGGCATTTCCTCGACTTAATAACATAAGTTTCTGATTACTTCCTCCTGCTTTACTGTTGCTTCTTTCTTCTGCAGCAGTAGAAAGTGGGGTTGGTACTGGGTGAACTGTTTATCCTCCTTTAGCAGGAAACTTAGCTCACGCTGGTGGTTCTGTAGATTTAGCTATTTTTTCTTTACATTTAGCTGGTGTTTCTTCTATTTTAGGTGCTGTAAATTTTATTACTACAATTATTAATATACGTTGACGTGGAATGCAATTTGAGCGATTACCATTGTTTGTTTGGTCAGTAAAAATTACTGCAGTATTACTTTTATTATCTTTACCTGTATTGGCTGGTGCTATTACTATGCTTTTAACTGATCGAAATTTTAATACTGCGTTTTTTGATCCAGCAGGGGGTGGTGATCCTATTCTTTATCAGCATTTATTT
>Seq70_[organism=Optediceros_breviculum]_[isolate=2020_67]
AACTTTATATATTTTATTTGGAATATGATCTGGCCTAGTTGGTACTGCATTAAGTTTACTTATTCGTGCTGAACTTGGTCAGCCTGGAGCTTTATTAGGTGATGATCAGCTTTATAATGTGATTGTTACAGCTCATGCTTTTGTTATAATTTTTTTTCTTGTTATACCAATGATAATTGGTGGTTTTGGGAATTGATTGGTTCCTTTAATGTTAGGTGCCCCAGATATAGCATTTCCTCGACTTAATAACATAAGTTTCTGACTACTTCCTCCTGCTTTACTGTTGCTTCTTTCTTCTGCTGCAGTAGAAAGTGGGGTTGGTACTGGGTGAACTGTTTATCCTCCTTTAGCAGGAAACTTAGCTCACGCTGGTGGTTCTGTAGATTTAGCTATTTTTTCTTTACATTTAGCTGGTGTTTCTTCTATTTTGGGTGCTGTAAATTTTATTACTACAATTATTAATATACGTTGACGTGGAATGCAATTTGAGCGATTACCATTGTTTGTTTGGTCAGTAAAAATTACTGCAGTATTACTTTTATTATCTTTACCTGTATTGGCTGGTGCTATTACTATGCTTTTAACTGATCGAAATTTTAATACTGCGTTTTTTGATCCAGCAGGGGGTGGTGATCCTATTCTTTATCAGCATTTATTT
>Seq71_[organism=Paromoionchis_tumidus]_[isolate=2020_75] 
AACATTATATATAATTTTTGGAGTGTGATGTGGGTTAGTGGGGACTGGACTTTCTCTTCTGATCCGATTTGAACTAGGAACTGCGGGAGTTTTACTT---GATGATCATTTTTATAATGTAATTGTGACTGCCCACGCTTTTGTAATGATTTTTTTTATAGTAATACCTTTAATAATTGGTGGGTTTGGAAATTGAATGGTTCCTCTTTTAATTGGGGCACCAGATATAAGATTTCCTCGAATAAATAATATAAGGTTTTGGTTACTCCCCCCTTCTTTTGTTCTTTTAATTGTTTCTAGATTAGTAGAAGGAGGGGCAGGAACTGGGTGGACAGTATACCCCCCTTTAAGAGGAGCTACTGCCCACGCGGGAGCGTCTGTAGACTTGGTGATTTTTTCATTACATTTAGCGGGGATATCTTCTATTTTAGGGGCGATTAACTTTATTACTACTATTTTTAATATACGAGCGCCAGGAATAACTATGGAACGAGTTAATTTGTTTGTGTGGTCTATTTTGGTTACGGTTTTTTTACTTTTGTTATCTTTACCTGTACTAGCAGGGGCAATTACGATGCTTTTAACAGACCGAAATTTTAACACTAGATTTTTTGACCCAGCAGGAGGTGGAGATCCTATTTTGTACCAGCATTTGTTC
>Seq72_[organism=Paromoionchis_tumidus]_[isolate=TC17]
---------------------------------------------TGGACTTTCTCTTCTGATCCGATTTGAACTAGGAACTGCGGGAGTTTTACTT---GATGATCATTTTTATAATGTAATTGTGACTGCCCACGCGTTTGTAATGATTTTTTTTATAGTAATACCTTTAATAATTGGTGGATTTGGAAATTGAATGGTTCCTCTTTTAATTGGGGCACCAGATATAAGATTTCCTCGAATAAATAATATAAGGTTTTGATTACTCCCCCCTTCTTTTGTTCTTTTAATTGTTTCTAGGTTAGTAGAAGGAGGGGCAGGAACTGGGTGGACAGTATACCCCCCTTTAAGAGGAGCTACTGCCCACGCGGGAGCGTCTGTAGACTTGGTGATTTTTTCATTACATTTAGCGGGGATATCTTCTATTTTAGGGGCGATTAACTTTATTACTACTATTTTTAATATACGAGCGCCAGGAATAACTATGGAACGAGTTAATTTGTTTGTGTGATCTATTTTGGTTACGGTTTTTTTACTTTTGTTATCTTT-------------------------------------------------------------------------------------------------------------
>Seq73_[organism=Phythia_sp.]_[isolate=2019_77.116]
TACCTTATATATAATCTTTGGTGTATGATGTGGTTTAGTGGGGACAGGACTTTCCCTTTTGATTCGATTTGAGTTAGGAACTGCTGGAAACCTCTTG---GACGATCATTTTTATAATGTCATTGTTACCGCTCACGCTTTTGTTATGATTTTCTTCATGGTCATGCCCCTCATAATTGGGGGATTCGGGAACTGGATGGTTCCGCTGTTAATCGGGGCACCTGACATAAGGTTTCCGCGGATAAACAACATAAGTTTTTGGTTGTTGCCCCCATCTTTTATTCTGTTAATTTGCTCTAGAATGGTTGAGGGGGGAGCAGGAACCGGTTGAACAGTTTACCCTCCACTGAGGGGGCCTATTGCCCATGCAGGGGCTTCTGTAGATTTAGTTATTTTTTCTCTACACCTTGCAGGAATGTCTTCGATTCTAGGGGCAATCAATTTTATTACTACAATTTTTAATATGCGATCGCCCGGAATAAGGATAGAACGAGTTAATCTGTTCGTCTGATCCATTCTTGTAACGGTCTTCCTATTACTCTTGTCATTACCAGTACTGGCTGGGGCAATTACGATATTATTAACCGATCGAAACTTTAATACAAGGTTCTTTGACCCGGCCGGGGGAGGGGATCCTATCCTATATAAGCACTTGTTT
>Seq74_[organism=Pirenella_alata]_[isolate=2019_120]
GACCTTATATATTTTGTTTGGAATATGATCAGGCTTGGTTGGAACTGCTTTAAGACTTTTAATTCGAGCTGAATTGGGCCAACCTGGGGCTTTACTAGGTGACGATCAACTTTATAACGTTATTGTTACAGCCCATGCTTTTGTTATAATTTTCTTTTTAGTTATACCTATAATGATTGGGGGGTTTGGAAATTGACTTGTGCCTTTAATGCTTGGGGCTCCAGATATGGCCTTCCCACGATTAAATAATATAAGTTTTTGACTCTTACCTCCAGCACTTGTTCTTCTCCTTTCTTCTGCCGCTGTAGAAAGTGGAGTCGGAACGGGATGAACTGTCTACCCTCCTTTATCTGGAAATCTTGCCCATGCAGGAGGTTCAGTAGATCTAGCTATTTTTTCTCTCCACTTAGCTGGTGTTTCTTCTATTCTAGGTGCTGTAAACTTTATTACTACTATTATTAATATGCGATGACGAGGAATACAATTCGAACGGCTTCCTTTATTTGTTTGATCAGTAAAAATTACAGCTATTCTTCTTCTCCTTTCCCTTCCTGTCTTAGCGGGGGCAATTACTATGCTACTAACTGATCGAAATTTTAATACTGCTTTCTTTGATCCAGCAGGAGGAGG----------------------------
>Seq75_[organism=Pirenella_alata]_[isolate=2019_10.52]
GACCTTATATATTTTGTTTGGAATATGATCAGGCTTGGTTGGAACTGCTTTAAGACTTTTAATTCGAGCTGAATTGGGCCAACCTGGGGCTTTATTAGGTGACGATCAACTTTATAACGTTATTGTTACAGCCCATGCTTTTGTTATAATTTTCTTTTTAGTTATACCTATAATGATTGGGGGGTTTGGAAATTGACTTGTGCCTTTAATGCTTGGGGCTCCAGATATGGCCTTCCCACGATTAAATAATATAAGTTTTTGACTTTTACCTCCAGCACTTGTTCTTCTCCTTTCTTCTGCCGCTGTAGAAAGTGGAGTCGGGACGGGATGAACTGTCTACCCTCCTTTATCTGGAAATCTTGCCCATGCAGGAGGTTCAGTAGATCTAGCTATTTTTTCTCTCCACTTAGCTGGTGTTTCTTCTATTCTAGGTGCTGTAAACTTTATTACTACTATTATTAATATGCGATGACGAGGAATACAATTCGAACGGCTTCCTTTATTTGTTTGATCAGTAAAAATTACAGCTATTCTTCTTCTCCTTTCCCTTCCTGTCTTAGCGGGGGCAATTACTATGCTACTAACTGATCGAAATTTTAATACTGCTTTCTTTGATCCAGCAGGAGGAGGAGATCCAATCTTATATCAACATCTCTTT
>Seq76_[organism=Pirenella_alata]_[isolate=2019_12.54]
GACCTTATATATTTTGTTTGGAATATGATCAGGCTTGGTTGGAACTGCTTTAAGACTTTTAATTCGAGCTGAATTGGGCCAACCTGGGGCTTTATTAGGTGACGATCAACTTTATAACGTTATTGTTACAGCTCATGCTTTTGTTATAATTTTCTTTTTAGTTATACCTATAATGATTGGGGGGTTTGGAAATTGACTTGTGCCTTTAATGCTTGGGGCTCCAGATATGGCCTTCCCACGATTAAATAATATAAGTTTTTGACTCTTACCTCCAGCACTTGTTCTTCTCCTTTCTTCTGCCGCTGTAGAAAGTGGAGTCGGGACGGGATGAACTGTCTACCCTCCTTTATCTGGAAATCTTGCCCATGCAGGAGGTTCAGTAGATCTAGCTATTTTTTCTCTCCACTTAGCTGGTGTTTCTTCTATTCTAGGTGCTGTAAACTTTATTACTACTATTATTAATATACGATGACGAGGAATACAATTCGAACGGCTTCCTTTATTTGTTTGATCAGTAAAAATTACAGCTATTCTTCTTCTCCTTTCCCTTCCTGTCTTAGCGGGGGCAATTACTATGCTACTAACTGATCGAAATTTTAATACTGCTTTCTTTGATCCAGCAGGAGGAGGAGATCCAATCCTATATCAACATCTCTTT
>Seq77_[organism=Pirenella_alata]_[isolate=2019_13.55]
GCCCTTATATATTTTGTTTGGAATATGATCAGGCTTGGTTGGAACTGCTTTAAGACTTTTAATTCGAGCTGAATTGGGCCAACCTGGGGCTTTATTAGGTGACGATCAACTTTATAACGTTATTGTTACAGCTCATGCTTTTGTTATAATTTTCTTTTTAGTTATACCTATAATGATTGGGGGGTTTGGAAATTGACTTGTGCCTTTAATGCTTGGGGCTCCAGATATGGCCTTCCCACGATTAAATAATATAAGTTTTTGACTCTTACCTCCAGCACTTGTTCTTCTCCTTTCTTCTGCCGCTGTAGAAAGTGGAGTCGGGACGGGATGAACTGTCTACCCTCCTTTATCTGGAAATCTTGCCCATGCAGGAGGTTCAGTAGATCTAGCTATTTTTTCTCTCCACTTAGCTGGTGTTTCTTCTATTCTAGGTGCTGTAAACTTTATTACTACTATTATTAATATGCGATGACGAGGAATACAATTCGAACGGCTTCCTTTATTTGTTTGATCAGTAAAAATTACAGCTATTCTTCTTCTCCTTTCCCTTCCTGTCTTAGCGGGGGCAATTACTATGCTACTAACTGATCGAAATTTTAAAACTGCTTTCTTTGATCCAGCAGGAGGAGGAGATCCAATCCTATATCAACATCTCTTT
>Seq78_[organism=Pirenella_alata]_[isolate=2019_14.56]
GGCCTTATATATTTTGTTTGGAATATGATCAGGCTTGGTTGGAACTGCTTTAAGACTTTTAATTCGAGCTGAATTGGGCCAACCTGGGGCTTTATTAGGTGACGATCAACTTTATAATGTTATTGTTACAGCCCATGCTTTTGTTATAATTTTCTTTTTAGTTATACCTATAATGATTGGGGGGTTTGGAAATTGACTTGTGCCTTTAATGCTTGGGGCTCCAGATATGGCCTTCCCACGATTAAATAATATAAGTTTTTGACTCTTACCTCCAGCACTTGTTCTTCTCCTTTCTTCTGCCGCTGTAGAAAGTGGAGTCGGGACGGGATGAACTGTCTACCCTCCTTTATCTGGAAATCTTGCCCATGCAGGAGGTTCAGTAGATCTAGCTATTTTTTCTCTCCACTTAGCTGGTGTTTCTTCTATTCTAGGTGCTGTAAACTTTATTACTACTATTATTAATATGCGATGACGAGGAATACAATTCGAACGGCTTCCTTTATTTGTTTGATCAGTAAAAATTACAGCTATTCTTCTTCTCCTTTCCCTTCCTGTCTTAGCGGGGGCAATTACTATGCTACTAACTGATCGAAATTTTAATACTGCTTTCTTTGATCCAGCAGGAGGAGGAGATCCAATCCTATATCAACATCTCTTT
>Seq79_[organism=Pirenella_alata]_[isolate=2019_15.57]
--------------------------------------------------------------------------------------------------------------------------TTGTTACAGCTCATGCTTTTGTTATAATTTTCTTTTTAGTTATACCTATAATGATTGGGGGGTTTGGAAATTGACTTGTGCCTTTAATGCTTGGGGCTCCAGATATGGCCTTCCCACGATTAAATAATATAAGTTTTTGACTCTTACCTCCAGCACTTGTTCTTCTCCTTTCTTCTGCCGCTGTAGAAAGTGGAGTCGGGACGGGATGAACTGTCTACCCTCCTTTATCTGGAAATCTTGCCCATGCAGGAGGTTCAGTAGATCTAGCTATTTTTTCTCTCCACTTAGCTGGGGTTTCTTCTATTCTAGGTGCTGTAAACTTTATTACTACTATTATTAATATGCGATGACGAGGAATACAATTCGAACGGCTTCCTTTATTTGTTTGATCAGTAAAAATTACAGCTATTCTTCTTCTCCTTTCCCTTCCTGTCTTAGCGGGGGCAATTACTATGCTACTAACTGATCGAAATTTTAATACTGCTTTCTTTGATCCAGC-------------------------------------
>Seq80_[organism=Pirenella_alata]_[isolate=2019_28.70]
GACCTTATATATTTTGTTTGGAATATGATCAGGCTTGGTTGGAACTGCTTTAAGACTTTTAATTCGAGCTGAATTGGGCCAACCTGGGGCTTTATTAGGTGACGATCAACTTTATAACGTTATTGTTACAGCTCATGCTTTTGTTATAATTTTCTTTTTAGTTATACCTATAATGATTGGGGGGTTTGGAAATTGACTTGTGCCTTTAATGCTTGGGGCTCCAGATATGGCCTTCCCACGATTAAATAATATAAGTTTTTGACTCTTACCTCCAGCACTTGTTCTTCTCCTTTCTTCTGCCGCTGTAGAAAGTGGAGTCGGGACGGGATGAACTGTCTACCCTCCTTTATCTGGAAATCTTGCCCATGCAGGAGGTTCAGTAGATCTAGCTATTTTTTCTCTCCACTTAGCTGGTGTTTCTTCTATTCTAGGTGCTGTAAACTTTATTACTACTATTATTAATATGCGATGACGAGGAATACAATTCGAACGGCTTCCTTTATTTGTTTGATCAGTAAAAATTACAGCTATTCTTCTTCTCCTTTCCCTTCCTGTCTTAGCGGGGGCAATTACTATGCTACTAACTGATCGAAATTTTAATACTGCTTTCTTTGATCCAGCAGGAGGAGGAGATCCAATCCTATATCAACATCTCTTT
>Seq81_[organism=Pirenella_alata]_[isolate=2019_65.105]
-----------------------------CAGGCTTGGTTGGAACTGCTTTAAGACTTTTAATTCGAGCTGAATTGGGCCAACCTGGAGCTTTATTAGGTGACGATCAACTTTATAACGTTATTGTTACAGCCCATGCTTTTGTTATAATTTTCTTTTTAGTTATACCTATAATGATTGGGGGGTTTGGAAATTGACTTGTGCCTTTAATGCTTGGGGCTCCAGATATGGCCTTCCCACGATTAAATAATATAAGTTTTTGACTCTTACCTCCAGCACTTGTTCTTCTCCTTTCTTCTGCCGCTGTAGAAAGTGGAGTCGGGACGGGATGAACTGTCTATCCTCCTTTATCTGGAAATCTTGCCCATGCAGGAGGTTCAGTAGATCTAGCTATTTTTTCTCTCCACTTAGCTGGTGTTTCTTCTATTCTAGGTGCTGTAAACTTTATTACTACTATTATTAATATGCGATGACGAGGAATACAATTCGAACGGCTTCCTTTATTTGTTTGATCAGTAAAAATTACAGCTATTCTTCTTCTCCTTTCCCTTCCTGTCTTAGCGGGGGCAATTACTATGCTACTAACTGATCGAAATTTTAATACTGCTTTCTTTGATCCAGCAGGAGGAGGAAATCCAATCTTATATCAACATCTCTTT
>Seq82_[organism=Pirenella_alata]_[isolate=2019_66.106]
GACCTTATATATTTTGTTTGGAATATGATCAGGCTTGGTTGGAACTGCTTTAAGACTTTTAATTCGAGCTGAATTGGGCCAACCTGGAGCTTTATTAGGTGACGATCAACTTTATAACGTTATTGTTACAGCCCATGCTTTTGTTATAATTTTCTTTTTAGTTATACCTATAATGATTGGGGGGTTTGGAAATTGACTTGTGCCTTTAATGCTTGGGGCTCCAGATATGGCCTTCCCACGATTAAATAATATAAGTTTTTGACTCTTACCTCCAGCACTTGTTCTTCTCCTTTCTTCTGCCGCTGTAGAAAGTGGAGTCGGGACGGGATGAACTGTCTATCCTCCTTTATCTGGAAATCTTGCCCATGCAGGAGGTTCAGTAGATCTAGCTATTTTTTCTCTCCACCTAGCTGGTGTTTCTTCTATTCTAGGTGCTGTAAACTTTATTACTACTATTATTAATATGCGATGACGAGGAATACAATTCGAACGGCTTCCTTTATTTGTTTGATCAGTAAAAATTACAGCTATTCTTCTTCTCCTTTCCCTTCCTGTCTTAGCGGGGGCAATTACTATGCTACTAACTGATCGAAATTTTAATACTGCTTTCTTTGATCCAGCAGGAGGAGGAGATCCAATCTTATATCAACATCTCTTT
>Seq83_[organism=Pirenella_alata]_[isolate=2019_9.51]
AACCTTATATATTTTGTTTGGAATATGATCAGGCTTGGTTGGAACTGCTTTAAGACTTTTAATTCGAGCTGAATTGGGCCAACCTGGGGCTTTATTAGGTGACGATCAACTTTATAACGTTATTGTTACAGCCCATGCTTTTGTTATAATTTTCTTTTTAGTTATACCTATAATAATCGGGGGGTTTGGAAATTGACTTGTGCCTTTAATGCTTGGGGCTCCAGATATGGCCTTCCCACGATTAAATAATATAAGTTTTTGACTTTTACCTCCAGCACTTGTTCTTCTCCTTTCTTCTGCCGCTGTAGAAAGTGGAGTCGGGACGGGATGAACTGTCTACCCTCCTTTATCTGGAAATCTTGCCCATGCAGGAGGTTCAGTAGATCTAGCTATTTTTTCTCTCCACTTAGCTGGTGTTTCTTCTATTCTAGGTGCTGTAAACTTTATTACTACTATTATTAATATGCGATGACGAGGAATACAATTCGAACGGCTTCCTTTATTTGTTTGATCAGTAAAGATTACAGCTATTCTTCTTCTCCTTTCCCTTCCTGTCTTAGCGGGGGCAATTACTATACTACTAACTGATCGAAATTTTAATACTGCTTTCTTTGATCCAGCAGGAGGAGGAGATCCAATCCTATATCAACATCTCTTT
>Seq84_[organism=Pirenella_alata]_[isolate=2019_91.130]
-----------------------------CAGGCTTGGTTGGAACTGCTTTAAGACTTTTAATTCGAGCTGAATTGGGCCAACCTGGGGCTTTATTAGGTGACGATCAACTTTATAACGTTATTGTTACAGCTCATGCTTTTGTTATAATTTTCTTTTTAGTTATACCTATAATGATTGGGGGGTTTGGAAATTGACTTGTGCCTTTAATGCTTGGGGCTCCAGATATGGCCTTCCCACGATTAAATAATATAAGTTTTTGACTCTTACCTCCAGCACTTGTTCTTCTCCTTTCTTCTGCCGCTGTAGAAAGTGGAGTCGGGACGGGATGAACTGTCTACCCTCCTTTATCTGGAAATCTTGCCCATGCAGGAGGTTCAGTAGATCTGACTATTTTTTCTCTCCACTTAGCTGGTGTTTCTTCTATTCTAGGTGCTGTAAACTTTATTACTACTATTATTAATATGCGATGACGAGGAATACAATTCGAACGGCTTCCTTTATTTGTTTGATCAGTAAAAATTACAGCTATTCTTCTTCTCCTTTCCCTTCCTGTCTTAGCGGGGGCAATTACTATGCTACTAACTGATCGAAATTTTAATACTGCTTTCTTTGATCCAGCAGGAGGAGG----------------------------
>Seq85_[organism=Pirenella_alata]_[isolate=2019_96.134]
AACCTTATATATTTTGTTTGGAATATGATCAGGCTTGGTTGGAACTGCTTTAAGACTTTTAATTCGAGCTGAATTGGGCCAACCTGGGGCTTTATTAGGTGACGATCAACTTTATAACGTTATTGTTACAGCCCATGCTTTTGTTATAATTTTCTTTTTAGTTATACCTATAATGATCGGGGGGTTTGGAAATTGACTTGTGCCTTTAATGCTTGGGGCTCCAGATATGGCCTTCCCACGATTAAATAATATAAGTTTTTGACTTCTACCTCCAGCACTTGTTCTTCTCCTTTCTTCTGCCGCTGTAGAAAGTGGAGTCGGGACGGGATGAACTGTCTACCCTCCTTTATCTGGAAATCTTGCCCATGCAGGAGGTTCAGTAGATCTAGCTATTTTTTCTCTCCACTTAGCTGGTGTTTCTTCTATTCTAGGTGCTGTAAACTTTATTACTACTATTATTAATATGCGATGACGAGGAATACAATTCGAACGGCTTCCTTTATTTGTTTGATCAGTAAAAATTACAGCTATTCTTCTTCTCCTTTCCCTTCCTGTCTTAGCGGGGGCAATTACTATGCTACTAACTGATCGAAATTTTAATACTGCTTTCTTTGA-------------------------------------------
>Seq86_[organism=Pirenella_alata]_[isolate=HK19]
GACCTTATATATTTTGTTTGGAATATGATCAGGCTTGGTTGGAACTGCTTTAAGACTTTTAATTCGAGCTGAATTGGGCCAACCTGGAGCTTTATTAGGTGACGATCAACTTTATAACGTTATTGTTACAGCCCATGCTTTTGTTATAATTTTCTTTTTAGTTATACCTATAATGATTGGGGGGTTTGGAAATTGACTTGTGCCTTTAATGCTTGGGGCTCCAGATATGGCCTTCCCACGATTAAATAATATAAGTTTTTGACTCTTACCTCCAGCACTTGTTCTTCTCCTTTCTTCTGCCGCTGTAGAAAGTGGAGTCGGGACGGGATGAACTGTCTATCCTCCTTTATCTGGAAATCTTGCCCATGCAGGAGGTTCAGTAGATCTAGCTATTTTTTCTCTCCACTTAGCTGGTGTTTCTTCTATTCTAGGTGCTGTAAACTTTATTACTACTATTATTAATATGCGATGACGAGGAATACAATTCGAACGGCTTCCTTTATTTGTTTGATCAGTAAAAATTACAGCTATTCTTCTTCTCCTTTCCCTTCCTGTCTTAGCGGGGGCAATTACTATGCTACTAACTGATCGAAATTTTAATACTGCTTTCTTTGATCCAGCAGGAGGAGGAGATCCAATCTTATATCAACATCTCTTT
>Seq87_[organism=Pirenella_alata]_[isolate=HK20]
AACCTTATATATTTTGTTTGGAATATGATCAGGCTTGGTTGGAACTGCTTTAAGACTTTTAATTCGAGCTGAATTGGGCCAACCTGGGGCTTTATTAGGTGACGATCAACTTTATAACGTTATTGTTACAGCCCATGCTTTTGTTATAATTTTCTTTTTAGTTATACCTATAATGATCGGGGGGTTTGGAAATTGACTTGTGCCTTTAATGCTTGGGGCTCCAGATATGGCCTTCCCACGATTAAATAATATAAGTTTTTGACTTCTACCTCCAGCACTTGTTCTTCTCCTTTCTTCTGCCGCTGTAGAAAGTGGAGTCGGGACGGGATGAACTGTCTACCCTCCTTTATCTGGAAATCTTGCCCATGCAGGAGGTTCAGTAGATCTAGCTATTTTTTCTCTCCACTTAGCTGGTGTTTCTTCTATTCTAGGTGCTGTAAACTTTATTACTACTATTATTAATATGCGATGACGAGGAATACAATTCGAACGGCTTCCTTTATTTGTTTGATCAGTAAAAATTACAGCTATTCTTCTTCTCCTTTCCCTTCCTGTCTTAGCGGGGGCAATTACTATGCTACTAACTGATCGAAATTTTAATACTGCTTTCTTTGATCCAGCAGGAGGAGGAGATCCAATCCTATATCAACATCTCTTT
>Seq88_[organism=Pirenella_alata]_[isolate=HK24]
AACCTTATATATTTTGTTTGGAATATGATCAGGCTTGGTTGGAACTGCTTTAAGACTTTTAATTCGAGCTGAATTGGGCCAACCTGGGGCTTTATTAGGTGACGATCAACTTTATAACGTTATTGTTACAGCCCATGCTTTTGTTATAATTTTCTTTTTAGTTATACCTATAATGATCGGGGGGTTTGGAAATTGACTTGTGCCTTTAATGCTTGGGGCTCCAGATATGGCCTTCCCACGATTAAATAATATAAGTTTTTGACTTCTACCTCCAGCACTTGTTCTTCTCCTTTCTTCTGCCGCTGTAGAAAGTGGAGTCGGGACGGGATGAACTGTCTACCCTCCTTTATCTGGAAATCTTGCCCATGCAGGAGGTTCAGTAGATCTAGCTATTTTTTCTCTCCACTTAGCTGGTGTTTCTTCTATTCTAGGTGCTGTAAACTTTATTACTACTATTATTAATATGCGATGACGAGGAATACAATTCGAACGGCTTCCTTTATTTGTTTGATCAGTAAAAATTACAGCTATTCTTCTTCTCCTTTCCCTTCCTGTCTTAGCGGGGGCAATTACTATGCTACTAACTGATCGAAATTTTAATACTGCTTTCTTTGATCCAGCAGGAGGAGGAGATCCAATCCTATATCAACATCTCTTT
>Seq89_[organism=Pirenella_asiatica]_[isolate=2019_138.76]
AACATTATATATTCTATTTGGTATATGATCTGGTTTAGTTGGAACTGCTCTGAGTCTTCTTATTCGGGCTGAACTTGGACAACCCGGAGCCTTGCTGGGTGATGATCAACTTTACAATGTAATTGTTACAGCTCACGCTTTTGTTATAATTTTCTTCCTAGTAATACCAATGATAATTGGTGGGTTCGGGAATTGACTCGTACCACTTATACTAGGAGCTCCTGACATGGCTTTCCCACGACTTAATAATATAAGCTTTTGACTACTACCACCAGCACTTTTACTCCTTCTTTCTTCAGCTGCTGTAGAGAGCGGAGTTGGAACTGGATGAACAGTCTATCCACCATTATCCGGAAACTTGGCTCATGCAGGAGGTTCTGTAGACCTAGCCATTTTCTCTCTCCATCTAGCTGGTGTTTCTTCTATTTTAGGTGCTGTAAACTTTATTACAACTATTATTAATATACGATGACGAGGAATACAATTTGAACGTCTTCCTCTTTTTGTATGGTCTGTAAAAATTACAGCTATTCTCCTTCTTCTTTCTCTACCTGTACTAGCCGGGGCTATTACTATGTTACTAACTGATCGAAATTTTAACACCGCTTTCTTTGATCCAGC-------------------------------------
>Seq90_[organism=Pirenella_asiatica]_[isolate=2020_2]
AACATTATACATTTTATTTGGTATATGATCTGGTTTAGTTGGAACTGCTCTGAGTCTCCTTATTCGGGCTGAACTTGGACAACCCGGAGCCTTGCTGGGTGATGATCAACTTTACAATGTAATTGTTACAGCCCACGCTTTTGTTATAATTTTCTTCCTAGTAATACCAATGATAATTGGTGGATTCGGGAATTGACTCGTACCACTTATACTAGGAGCTCCTGACATGGCTTTCCCACGACTTAATAATATAAGCTTTTGACTACTACCACCAGCACTTTTACTCCTTCTTTCTTCAGCTGCTGTAGAGAGCGGAGTTGGAACTGGATGAACAGTCTATCCACCACTATCTGGAAACTTGGCTCATGCAGGAGGTTCTGTAGATCTAGCCATTTTTTCTCTTCATCTAGCTGGTGTTTCTTCTATTTTAGGTGCTGTAAATTTTATTACAACTATTATTAATATACGATGACGAGGAATACAATTTGAACGTCTTCCTCTTTTTGTATGGTCTGTAAAAATTACAGCTATTCTCCTTCTTCTTTCTCTACCTGTACTAGCCGGGGCTATTACTATGTTACTAACTGATCGAAATTTTAACACCGCTTTCTTTGATCCAGCAGGAGGTGGAGACCCAATTTTGTATCAGCATCTCTTT
>Seq91_[organism=Pirenella_incisa]_[isolate=2019_159.197]
GACTTTATATATTTTGTTTGGAATATGATCAGGCCTAGTTGGAACTGCTCTCAGACTCTTAATTCGAGCTGAGTTAGGACAACCTGGAGCTTTGCTTGGTGACGATCAACTTTATAATGTCATTGTTACAGCCCATGCTTTCGTTATAATTTTCTTTTTAGTAATACCTATAATGATTGGGGGGTTTGGAAATTGACTTGTGCCTTTAATACTTGGGGCTCCTGATATGGCCTTCCCTCGGTTAAATAATATAAGTTTTTGGTTGTTACCTCCAGCACTTCTTCTCTTACTTTCTTCAGCTGCAGTTGAAAGCGGAGTGGGGACAGGTTGAACTGTATATCCTCCTTTATCAGGAAATCTTGCTCATGCGGGAGGATCTGTTGACTTAGCAATTTTTTCTCTCCATTTAGCTGGTGTTTCTTCTATTTTAGGTGCTGTGAATTTTATCACCACGATTATTAACATGCGATGACGAGGGATACAATTTGAACGTCTTCCTCTATTCGTTTGATCGGTAAAAATTACAGCTATCCTTCTACTTCTCTCTTTACCTGTTTTGGCTGGAGCCATTACTATATTATTAACTGACCGAAATTTCAATACTGCTTTCTTTGACCCAGCTGGAGGT------------------------------
>Seq92_[organism=Pirenella_incisa]_[isolate=2019_17.59]
-----------------------------------------------------------------------------------------------------ACGATCAACTTTATAATGTTATTGTTACAGCCCATGCTTTCGTTATAATTTTCTTTTTAGTAATACCTATAATGATTGGGGGGTTTGGAAATTGACTTGTGCCTTTAATACTTGGGGCCCCTGATATGGCCTTCCCTCGGTTAAATAATATAAGTTTTTGGTTGTTACCTCCAGCACTTCTTCTCTTACTTTCTTCAGCTGCAGTTGAAAGCGGAGTGGGGACAGGTTGAACTGTATATCCTCCTTTATCAGGAAATCTTGCTCATGCGGGAGGATCTGTTGACTTAGCAATTTTTTCTCTCCATTTAGCTGGTGTTTCTTCTATTTTAGGTGCTGTGAATTTTATCACCACGATTATTAACATGCGATGACGAGGAATACAATTTGAACGTCTTCCTCTATTCGTTTGATCGGTAAAAATTACAGCTATCCTTCTACTTCTCTCTTTACCTGTTTTGGCTGGAGCCTTTACTATGTTATTAACTGACCGAAATTTCAATACTGCTTTCTTTGACCCAGCTGGAGGTGGGGATCCTATTTTATACCAACATCTCTTT
>Seq93_[organism=Pirenella_incisa]_[isolate=2019_20.62]
GACTTTATATATTTTGTTTGGAATATGATCAGGCCTAGTTGGAACTGCTCTCAGACTCTTAATTCGAGCTGAGTTAGGACAACCTGGAGCTTTGCTTGGTGACGATCAACTTTATAATGTTATTGTTACAGCCCATGCTTTCGTTATAATTTTCTTTTTAGTAATACCTATAATGATTGGCGGGTTTGGAAATTGACTTGTGCCTTTAATACTTGGGGCTCCTGATATGGCCTTCCCTCGATTAAATAATATAAGTTTTTGGTTGTTACCTCCAGCACTTCTTCTCTTACTTTCTTCAGCTGCAGTTGAAAGCGGAGTGGGGACAGGTTGAACTGTATATCCTCCTTTATCAGGAAATCTTGCTCATGCGGGAGGATCTGTTGACTTAGCAATTTTTTCTCTCCATTTAGCTGGTGTTTCTTCTATTTTAGGTGCTGTGAATTTTATCACCACGATTATTAACATGCGATGACGAGGGATACAATTTGAACGTCTTCCTCTATTCGTTTGATCGGTAAAAATTACAGCTATCCTTCTACTTCTCTCTTTACCTGTTTTGGCTGGAGCCATTACTATGTTATTAACTGACCGAAATTTCAATACTGCTTTCTTTGACCCAGCTGGAGGTGGGGATCCTATTTTATACCAACATCTCTTT
>Seq94_[organism=Pirenella_incisa]_[isolate=2019_67.107]
GACTTTATATATTTTGTTTGGAATATGATCAGGCCTAGTCGGAACTGCTCTCAGACTCTTAATTCGAGCTGAGTTAGGACAACCTGGAGCTTTGCTTGGTGACGATCAACTTTATAATGTTATTGTTACAGCCCATGCTTTCGTTATAATTTTCTTTTTAGTAATACCTATAATGATTGGGGGGTTTGGAAATTGACTTGTGCCTTTAATACTTGGGGCTCCTGATATGGCCTTCCCTCGGTTAAATAATATAAGTTTTTGGTTGTTACCTCCAGCACTTCTTCTCTTACTTTCTTCAGCTGCAGTTGAAAGCGGAGTGGGGACAGGTTGAACTGTATATCCTCCTTTATCAGGAAATCTTGCTCATGCGGGAGGATCTGTTGACTTAGCAATTTTTTCTCTCCATTTAGCTGGTGTTTCTTCTATTTTAGGTGCTGTGAATTTTATCACCACGATTATTAACATGCGATGACGGGGGATACAATTTGAACGTCTTCCTCTATTCGTTTGATCGGTAAAAATTACAGCTATCCTTCTACTTCTCTCTTTACCTGTTTTGGCTGGAGCCATTACTATGTTATTAACTGACCGAAATTTCAATACTGCTTTCTTTGACCCAGCTGGAGGTGGGGATCCTATTTTATACCAACATCTCTTT
>Seq95_[organism=Pirenella_incisa]_[isolate=2019_69.109]
GACTTTATATATTTTGTTTGGAATATGATCAGGCCTAGTTGGAACTGCTCTCAGACTCTTAATTCGAGCTGAGTTAGGACAACCTGGAGCTTTGCTTGGTGACGATCAACTTTATAATGTTATTGTTACAGCCCATGCTTTCGTTATAATTTTCTTTTTAGTAATGCCTATAATGATTGGGGGGTTTGGAAATTGACTTGTGCCTTTAATACTTGGGGCTCCTGATATGGCCTTCCCTCGGTTAAATAATATAAGTTTTTGGTTGTTACCTCCAGCACTTCTTCTCTTACTTTCTTCAGCTGCAGTTGAAAGCGGGGTGGGGACAGGTTGAACTGTATATCCTCCTTTATCAGGAAATCTTGCTCATGCGGGAGGATCTGTTGACTTAGCAATTTTTTCTCTCCATTTAGCTGGTGTTTCTTCTATTTTAGGTGCTGTGAATTTTATCACCACGATTATTAACATGCGATGACGAGGGATACAATTTGAACGTCTTCCTCTATTCGTTTGATCGGTAAAAATTACAGCTATCCTTCTACTTCTCTCTTTACCTGTTTTGGCTGGAGCCATTACTATATTACTAACTGACCGAAATTTCAATACTGCTTTCTTTGACCCAGCTGGAGGTGGGGATCCTATTTTATACCAACATCTCTTT
>Seq96_[organism=Pirenella_incisa]_[isolate=2019_88.127]
-ACTTTATATATTTTGTTTGGAATATGATCAGGCCTAGTTGGAACTGCTCTCAGACTCTTAATTCGAGCTGAGTTAGGACAACCTGGAGCTTTGCTTGGTGACGATCAACTTTATAATGTTATTGTTACAGCCCATGCTTTCGTTATAATTTTCTTTTTAGTAATACCTATAATGATTGGGGGGTTTGGAAATTGACTTGTGCCTTTAATACTTGGGGCTCCTGATATGGCCTTCCCTCGGTTAAATAATATAAGTTTTTGGTTGTTACCTCCAGCACTTCTTCTCTTACTTTCTTCAGCTGCAGTTGAAAGCGGAGTGGGGACAGGTTGAACTGTATATCCTCCTTTATCAGGAAATCTTGCTCATGCGGGAGGATCTGTTGACTTAGCAATTTTTTCTCTCCATTTAGCTGGTGTTTCTTCTATTTTAGGTGCTGTGAATTTTATCACCACGATTATTAACATGCGATGACGAGGGATACAATTTGAACGTCTTCCTCTATTTGTTTGATCGGTAAAAATTACAGCTATCCTTCTACTTCTCTCTTTACCTGTTTTGGCTGGAGCCATTACTATGTTATTAACTGACCGAAATTTCAATACTGCTTTCTTTGACCCAGCTGGAGGTGGGGATCCTATTTTATACCAACATCTCTTT
>Seq97_[organism=Pirenella_incisa]_[isolate=HK11]
GACTTTATATATTTTGTTTGGAATATGATCAGGCCTAGTTGGAACTGCTCTCAGACTCTTAATTCGAGCTGAGTTAGGACAACCTGGAGCTTTGCTTGGTGACGATCAACTTTATAATGTTATTGTTACAGCCCATGCTTTCGTTATAATTTTCTTTTTAGTAATACCTATAATGATTGGGGGGTTTGGAAATTGACTTGTGCCTTTAATACTTGGGGCTCCTGATATGGCCTTCCCTCGGTTAAATAATATAAGTTTTTGGTTGTTACCTCCAGCACTTCTTCTCTTACTTTCTTCAGCTGCAGTTGAAAGCGGAGTGGGGACAGGTTGAACTGTATATCCTCCTTTATCAGGAAATCTTGCTCATGCGGGAGGATCTGTTGACTTAGCAATTTTTTCTCTCCATTTAGCTGGTGTTTCTTCTATTTTAGGTGCTGTGAATTTTATCACCACGATTATTAACATGCGATGACGAGGGATACAATTTGAACGTCTTCCTCTATTCGTTTGATCGGTAAAAATTACAGCTATCCTTCTACTTCTCTCTTTACCTGTTTTGGCTGGAGCCATTACTATGTTATTAACTGACCGAAATTTCAATACTGCTTTCTTTGACCCAGCTGGAGGTGGGGATCCTATATTATACCAACATCTCTCT
>Seq98_[organism=Pirenella_incisa]_[isolate=HK12]
-------------------GGAATATGATCAGGCCTAGTTGGAACTGCTCTCAGACTCTTAATTCGAGCTGAGTTAGGACAACCTGGAGCTTTGCTTGGTGACGATCAACTTTATAATGTTATTGTTACAGCCCATGCTTTCGTTATAATTTTCTTTTTAGTAATACCTATAATGATTGGGGGGTTTGGAAATTGACTTGTGCCTTTAATACTTGGGGCTCCTGATATGGCCTTCCCTCGGTTAAATAATATAAGTTTTTGGTTGTTACCTCCAGCACTTCTTCTCTTACTTTCTTCAGCTGCAGTTGAAAGCGGAGTGGGGACAGGTTGAACTGTATATCCTCCTTTATCAGGAAATCTTGCTCATGCGGGAGGATCTGTTGACTTAGCAATTTTTTCTCTCCATTTAGCTGGTGTTTCTTCTATTTTAGGTGCTGTGAATTTTATCACCACGATTATTAACATACGATGACGAGGGATACAATTTGAACGTCTCCCTCTATTCGTTTGATCGGTAAAAATTACAGCTATCCTTCTACTTCTCTCTTTACCTGTTTTGGCTGGAGCCATTACTATGTTATTAACTGACCGAAATTTCAATACTGCTTTCTTTGACCCAGCTGGAGGTGGGGATCCTATTTTATACCAACATCTCTTT
>Seq99_[organism=Pirenella_incisa]_[isolate=HK14]
GACTTTATATATTTTGTTTGGAATATGATCAGGCCTAGTTGGAACTGCTCTCAGACTCTTAATTCGAGCTGAGTTAGGACAACCTGGAGCTTTGCTTGGTGACGATCAACTTTATAATGTTATTGTCACAGCCCATGCTTTCGTTATAATTTTCTTTTTAGTAATACCTATAATGATTGGGGGGTTTGGAAATTGACTTGTGCCTTTAATACTTGGGGCTCCTGATATGGCCTTCCCTCGGTTAAATAATATAAGTTTTTGGTTGTTACCTCCAGCACTTCTTCTCTTACTTTCTTCAGCTGCAGTTGAAAGCGGAGTGGGGACAGGTTGAACTGTATATCCTCCTTTATCAGGAAATCTTGCTCATGCGGGAGGATCTGTTGACTTAGCAATTTTTTCTCTCCATTTAGCTGGTGTTTCTTCTATTTTAGGTGCTGTGAATTTTATCACCACGATTATTAACATGCGATGACGAGGGATACAATTTGAACGTCTTCCTCTATTCGTTTGATCGGTAAAAATTACAGCTATCCTTCTACTTCTCTCTTTACCTGTTTTGGCTGGAGCCATTACTATGTTATTAACTGACCGAAATTTCAATACTGCTTTCTTTGACCCAGCTGGAGGTGGGGATCCTATTTTATACCAACATCTCT--
>Seq100_[organism=Pirenella_incisa]_[isolate=HK15]
GACTTTATATATTTTGTTTGGAATATGATCAGGCCTAGTTGGAACTGCTCTCAGACTCTTAATTCGAGCTGAGTTAGGACAACCTGGAGCTTTGCTTGGTGACGATCAACTTTATAATGTTATTGTTACAGCCCATGCTTTCGTTATAATTTTCTTTTTAGTAATACCTATAATGATTGGGGGGTTTGGAAATTGACTTGTGCCTTTAATACTTGGGGCTCCTGATATGGCCTTCCCTCGGTTAAATAATATAAGTTTTTGGTTGTTACCTCCAGCACTTCTTCTCTTACTTTCTTCAGCTGCAGTTGAAAGCGGAGTGGGGACAGGTTGAACTGTATATCCTCCTTTATCAGGAAATCTTGCTCATGCGGGAGGATCTGTTGACTTAGCAATTTTTTCTCTCCATTTAGCTGGTGTTTCTTCTATTTTAGGTGCTGTGAATTTTATCACCACGATTATTAACATGCGATGACGAGGGATACAATTTGAACGTCTTCCTCTATTCGTTTGATCGGTAAAAATTACAGCTATCCTTCTACTTCTCTCTTTACCTGTCTTGGCTGGAGCCATTACTATGTTATTAACTGACCGAAATTTCAATACTGCTTTCTTTGACCCAGCTGGAGGTGGGGATCCTATTTTATACCAACATCTCTTT
>Seq101_[organism=Pirenella_nanhaiensis]_[isolate=2019_144.182]
GACCTTATATATTTTATTTGGAATGTGATCAGGTCTAGTTGGAACTGCCTTAAGACTTTTAATTCGAGCTGAACTCGGACAGCCTGGGGCTTTATTAGGCGATGATCAACTTTATAACGTTATTGTCACAGCTCATGCCTTTGTTATAATTTTTTTCTTAGTTATGCCTATAATAATTGGAGGTTTTGGAAATTGACTTGTGCCTCTAATACTTGGAGCTCCAGACATGGCTTTTCCTCGATTAAATAACATAAGTTTTTGACTCTTGCCACCAGCACTTGTCCTTCTCCTCTCTTCTGCTGCTGTTGAAAGCGGGGTAGGAACGGGGTGAACTGTTTACCCTCCTTTATCTGGAAATCTTGCTCATGCGGGGGGCTCTGTGGATCTAGCTATTTTCTCCCTCCACTTAGCTGGTGTTTCTTCTATTCTAGGTGCTGTAAACTTTATTACTACTATTATTAATATACGATGACGAGGAATACAATTTGAACGACTTCCTCTGTTCGTTTGATCAGTAAAGATTACAGCTATTCTCCTTCTTCTTTCTCTTCCTGTTTTGGCCGGAGCAATTACTATGCTGTTGACAGATCGAAACTTCAATACTACCTTTTTTGACCCGGCAGGAGGGGGGGATCCAATCTTATATCAGCATCTCTTT
>Seq102_[organism=Pirenella_nanhaiensis]_[isolate=2020_37]
GACCTTATATATTTTATTTGGAATGTGATCAGGTCTAGTTGGAACTGCCTTAAGACTTTTAATTCGAGCTGAACTCGGACAGCCTGGGGCTTTATTAGGCGATGATCAACTTTATAACGTTATTGTCACAGCTCATGCCTTTGTTATAATTTTTTTCTTAGTTATGCCTATAATAATTGGAGGTTTTGGAAATTGACTTGTGCCTTTAATACTTGGAGCTCCAGACATGGCTTTTCCTCGATTAAATAACATAAGTTTTTGACTCTTACCACCAGCACTTGTCCTTCTCCTCTCTTCTGCTGCTGTTGAAAGCGGGGTAGGAACGGGGTGAACTGTTTACCCTCCTTTATCTGGAAATCTTGCTCATGCGGGGGGCTCTGTGGATCTAGCTATTTTCTCCCTCCACTTAGCGGGTGTTTCTTCTATTCTAGGTGCTGTAAACTTTATTACTACTATTATTAATATACGATGACGAGGAATACAATTTGAACGACTTCCTCTGTTCGTTTGATCAGTAAAGATTACAGCTATTCTCCTTCTTCTTTCTCTTCCTGTTTTGGCCGGAGCAATTACTATGCTGTTGACAGATCGAAACTTCAATACTGCCTTTTTTGACCCGGCAGGAGGGGGGGATCCAATCTTATATCAGCATCTCTTT
>Seq103_[organism=Pirenella_nanhaiensis]_[isolate=2020_38]
GACCTTATATATTTTATTTGGAATGTGATCAGGTCTAGTTGGAACTGCCTTAAGACTTTTAATTCGAGCTGAACTCGGACAGCCTGGGGCTTTATTAGGCGATGATCAACTTTATAACGTTATTGTCACAGCTCATGCCTTTGTTATAATTTTTTTCTTAGTTATGCCTATAATAATTGGAGGTTTTGGAAATTGACTTGTGCCTTTAATACTTGGAGCTCCAGACATGGCTTTTCCTCGATTAAATAACATAAGTTTTTGACTCTTACCACCAGCACTTGTCCTTCTCCTCTCTTCTGCTGCTGTTGAAAGCGGGGTAGGAACGGGGTGAACTGTTTACCCTCCTTTATCTGGAAATCTTGCTCATGCGGGGGGCTCTGTGGATCTAGCTATTTTCTCCCTCCACTTAGCGGGTGTTTCTTCTATTCTAGGTGCTGTAAACTTTATTACTACTATTATTAATATACGATGACGAGGAATACAATTTGAACGACTTCCTCTGTTCGTTTGATCAGTAAAGATTACAGCTATTCTCCTTCTTCTTTCTCTTCCTGTTTTGGCCGGAGCAATTACTATGCTGTTGACAGATCGAAACTTCAATACTGCCTTTTTTGACCCGGCAGGAGGGGGGGATCCAATCTTATACCAGCATCTCTTT
>Seq104_[organism=Pirenella_nanhaiensis]_[isolate=2019_27.69]
GACCTTATATATTTTATTTGGAATGTGATCAGGTCTAGTTGGAACTGCCTTAAGACTTTTAATTCGAGCTGAACTCGGACAGCCTGGGGCTTTATTAGGCGATGATCAACTTTATAACGTTATTGTCACAGCTCATGCCTTTGTTATAATTTTTTTCTTAGTTATGCCTATAATAATTGGAGGTTTTGGAAATTGACTTGTGCCTTTAATACTTGGAGCTCCAGACATGGCTTTTCCTCGATTAAATAACATAAGTTTTTGACTCTTACCACCAGCACTTGTCCTTCTCCTCTCTTCTGCTGCTGTTGAAAGCGGGGTAGGAACGGGGTGAACTGTTTACCCTCCTTTATCTGGAAATCTTGCTCATGCGGGGGGCTCTGTGGATCTAGCTATTTTCTCCCTCCACTTAGCGGGTGTTTCTTCTATTCTAGGTGCTGTAAACTTTATTACTACTATTATTAATATACGATGACGAGGAATACAATTTGAACGACTTCCTCTGTTCGTTTGATCAGTAAAGATTACAGCTATTCTCCTTCTTCTTTCTCTTCCTGTTTTGGCCGGAGCAATTACTATGCTGTTGACAGATCGAAACTTCAATACTGCCTTTTTTGACCCGGCAGGAGGGGGGGATCCAATCTTATACCAGCATCTCTTT
>Seq105_[organism=Pirenella_pupiformis]_[isolate=2019_24.66]
-----------------------------CGGGTTTAGTTGGAACTGCTCTTAGACTCTTAATTCGGGCTGAGTTAGGACAGCCTGGGGCTTTGCTTGGTGACGATCAACTTTACAATGTTATTGTTACAGCCCATGCTTTCGTTATAATTTTCTTTTTGGTAATACCCATAATAATTGGGGGATTTGGAAATTGACTTGTGCCTTTAATGCTTGGGGCTCCTGATATAGCTTTTCCTCGACTAAATAATATAAGTTTTTGATTGCTACCTCCAGCACTTCTTCTTTTGCTTTCTTCAGCCGCAGTTGAAAGCGGGGTGGGAACAGGTTGAACTGTATATCCTCCTCTATCTGGAAATCTTGCTCATGCAGGGGGATCTGTTGACTTAGCTATTTTCTCCCTCCACTTAGCCGGTGTTTCTTCTATTCTAGGTGCTGTAAATTTTATTACCACAATTATTAATATACGATGACGAGGAATGCAGTTTGAACGTCTTCCTCTATTTGTTTGATCAGTAAAAATTACAGCTATTCTCCTTCTTCTTTCTTTACCTGTCTTAGCTGGAGCAATTACTATGTTGTTAACGGACCGAAATTTTAACACTGCTTTCTTTGATCCGGCCGGAGGTGGGGATCCCATTCT----------------
>Seq106_[organism=Pirenella_pupiformis]_[isolate=2019_25.67]
AACTTTATATATTTTGTTTGGAATATGATCAGGTTTGGTTGGAACTGCTCTCAGACTCTTAATTCGGGCTGAGTTAGGACAGCCTGGGGCTTTGCTTGGTGACGACCAACTTTACAATGTTATTGTTACAGCCCATGCTTTCGTTATAATTTTCTTTTTAGTAATGCCTATGATAATTGGGGGATTTGGAAATTGACTTGTGCCCTTAATGCTTGGGGCTCCTGATATGGCTTTTCCTCGACTAAATAATATAAGTTTTTGATTGCTACCTCCAGCACTTCTTCTTCTGCTTTCTTCAGCCGCAGTTGAAAGCGGGGTGGGAACAGGTTGAACTGTATATCCTCCTCTATCTGGAAATCTTGCTCATGCAGGGGGATCTGTTGATTTAGCTATTTTCTCTCTCCACTTAGCCGGTGTTTCTTCTATTCTAGGTGCTGTAAATTTTATTACCACAATTATTAATATACGATGACGAGGAATGCAGTTTGAACGTCTTCCTCTATTTGTTTGATCAGTAAAAATTACAGCTATTCTCCTTCTTCTTTCTTTACCTGTCTTGGCTGGAGCGATTACTATGTTGTTAACGGACCGAAATTTTAACACTGCTTTCTTTGACCCAGCCGGAGGTGGGGATCCAATTCTATACCAACATCTCTTT
>Seq107_[organism=Pirenella_pupiformis]_[isolate=HK17]
AACTTTATATATTTTGTTTGGAATATGATCGGGTTTGGTTGGAACTGCTCTCAGACTCTTAATTCGGGCTGAGTTAGGACAGCCTGGGGCTTTGCTTGGTGACGACCAACTTTACAATGTTATTGTTACAGCCCATGCTTTCGTTATAATTTTCTTTTTGGTAATACCCATGATAATTGGGGGATTTGGAAATTGACTTGTGCCTTTAATGCTTGGGGCTCCTGATATAGCTTTTCCTCGACTAAATAATATAAGTTTTTGATTGCTACCTCCAGCACTTCTTCTTTTGCTTTCTTCAGCCGCAGTTGAAAGCGGGGTGGGAACAGGTTGAACTGTATATCCTCCTCTATCTGGAAATCTTGCTCATGCAGGGGGATCTGTTGACTTAGCTATTTTCTCCCTCCACTTAGCCGGTGTTTCTTCTATTCTAGGTGCTGTAAATTTTATTACCACAATTATTAATATACGATGACGAGGAATGCAGTTTGAACGTCTTCCTCTATTTGTTTGATCAGTAAAAATTACAGCTATTCTCCTTCTTCTTTCTTTACCTGTCTTAGCTGGAGCAATTACTATGTTGTTAACGGACCGAAATTTTAACACTGCTTTCTTTGATCCGGCCGGAGGTGGGGATCCAATTCTATACCAACATCTCTTT
>Seq108_[organism=Pirenella_pupiformis]_[isolate=HK18]
AACTTTATATATTTTGTTTGGAATATGATCGGGTTTGGTTGGAACTGCTCTCAGACTCTTAATTCGGGCTGAGTTAGGACAGCCTGGGGCTTTGCTTGGTGACGACCAACTTTACAATGTTATTGTTACAGCCCATGCTTTCGTTATAATTTTCTTTTTGGTAATACCCATGATAATTGGGGGATTTGGAAATTGACTTGTGCCTTTAATGCTTGGGGCTCCTGATATAGCTTTTCCTCGACTAAATAATATAAGTTTTTGATTGCTACCTCCAGCACTTCTTCTTTTGCTTTCTTCAGCCGCAGTTGAAAGCGGGGTTGGAACAGGTTGAACTGTATATCCTCCTCTATCTGGAAATCTTGCTCATGCAGGGGGATCTGTTGACTTAGCTATTTTCTCCCTCCACTTAGCCGGTGTTTCTTCTATTCTAGGTGCTGTAAATTTTATTACCACAATTATTAATATACGATGACGAGGAATGCAGTTTGAACGTCTTCCTCTATTTGTTTGATCAGTAAAAATTACAGCTATTCTCCTTCTTCTTTCTTTACCTGTCTTAGCTGGAGCAATTACTATGTTGTTAACGGACCGAAATTTTAACACTGCTTTCTTTGATCCGGCCGGAGGTGGGGATCCAATTCTATACCAACACCTCTTT
>Seq109_[organism=Planaxis_sulcatus]_[isolate=2020_42]
AACACTTTATATCTTATTTGGTATATGATCTGGTCTAGCAGGAACTGCTCTTAGACTCTTAATTCGTGCTGAGCTAGGGCAGCCTGGAGCTCTCTTAGGAGACGACCAACTATATAATGTTATTGTAACAGCTCACGCTTTTGTAATAATTTTCTTCCTGGTAATGCCAATGATAATTGGTGGGTTCGGAAATTGATTGGTTCCCCTAATACTAGGGGCTCCTGATATGGCTTTCCCCCGATTAAATAATATAAGTTTCTGATTATTACCCCCAGCTCTACTTCTCCTCCTATCCTCTGCAGCTGTAGAAAGTGGGGTTGGAACAGGATGAACTGTTTATCCTCCCCTTTCTGGTAATTTAGCTCATGCTGGTGGATCAGTGGACCTAGCTATCTTTTCCCTTCATCTTGCAGGTGTCTCTTCTATTTTAGGGGCTGTTAACTTTATCACAACAATTATCAACATACGATGACGGGGAATGCAGTTTGAACGACTTCCTTTATTTGTATGATCTGTGAAAATCACAGCAATTCTCCTCTTACTGTCTCTACCTGTCTTAGCTGGAGCTATTACAATGCTACTAACGGACCGAAATTTTAATACTGCTTTCTTTGACCCGGCAGGAGGTGGTGACCCAATCTTGTATCAACACCTGTTT
>Seq110_[organism=Planaxis_sulcatus]_[isolate=2020_58]
AACACTTTATATCTTATTTGGTATATGATCTGGTCTAGCAGGAACTGCTCTTAGACTCTTAATTCGTGCTGAGCTAGGGCAGCCTGGAGCTCTCTTAGGAGACGACCAACTATATAATGTTATTGTAACAGCTCACGCTTTTGTAATAATTTTCTTCCTGGTAATGCCAATGATAATTGGTGGGTTCGGAAATTGATTGGTTCCCCTAATACTAGGGGCTCCTGATATGGCTTTCCCCCGATTAAATAATATGAGTTTCTGATTATTACCCCCAGCTCTACTTCTCCTCCTATCCTCTGCAGCTGTAGAAAGTGGGGTTGGAACAGGATGAACTGTTTATCCTCCCCTTTCTGGTAATCTAGCTCATGCTGGTGGATCCGTGGACCTAGCCATCTTTTCCCTTCATCTTGCAGGTGTCTCTTCTATTTTAGGGGCTGTTAACTTTATCACAACAATTATTAATATACGATGACGGGGAATGCAGTTTGAACGACTTCCTTTATTTGTATGATCCGTGAAAATCACAGCAATTCTCCTCTTACTGTCTCTACCTGTCTTAGCTGGAGCTATTACAATACTACTAACGGACCGAAATTTTAATACTGCTTTCTTTGATCCGGCAGGAGGTGGTGACCCAATCTTGTATCAGCACCTGTTT
>Seq111_[organism=Platevindex_mortoni]_[isolate=2020_72]
TACTTTATATATAATTTTTGGTGTTTGATGTGGGCTAGTTGGGACCGGTCTATCTTTACTAATTCGTTTTGAGTTAGGGACAGCGGGAGTTCTATTA---GACGATCATTTTTACAATGTTATTGTCACGGCTCATGCGTTTGTTATAATTTTCTTTATAGTAATACCTTTGATAATTGGAGGATTTGGTAATTGGATGGTACCATTGCTAATTGGTGCTCCCGATATAAGGTTTCCTCGAATAAATAATATAAGTTTTTGACTTTTACCACCTTCTTTTATTTTATTAATTGTGTCTAGTTTAGTAGAAGGGGGAGCTGGGACTGGATGAACAGTTTACCCACCTCTTAGCGGTCCGACAGCACATGCTGGAGCTTCTGTCGATCTAGTTATTTTCTCTTTACACTTAGCAGGGATGTCTTCTATTCTTGGTGCTATTAATTTTATTACTACCATTTTTAACATACGATCACCTGGGATAACTATAGAACGTGTTAATTTATTTGTTTGGTCTATTTTAGTTACCGTATTTTTGCTCCTCCTATCACTGCCTGTGTTAGCCGGTGCTATTACTATACTTTTAACTGATCGTAATTTTAATACTAGGTTTTTTGACCCGGCAGGGGGCGGAGACCCTATCCTGTACCAACATTTATTT
>Seq112_[organism=Platevindex_sp.]_[isolate=2020_70]
GACATTATATATGATTTTTGGTGTTTGATGTGGCTTAGTAGGAACTGGCCTATCTTTATTAATTCGGTTTGAGCTTGGTACTGCTGGTGTGCTCTTA---GATGACCATTTTTATAATGTTATTGTGACGGCCCATGCATTTGTAATAATTTTCTTCATAGTGATACCCTTAATGATTGGGGGTTTTGGGAATTGAATAGTACCTCTTTTAATTGGGGCACCTGATATGAGATTTCCGCGGATAAATAATATAAGGTTTTGATTACTACCCCCTTCTTTTGTTTTACTGATTGTATCTAGTTTAGTAGAAGGTGGGGCAGGAACTGGCTGAACAGTCTACCCGCCATTGAGCGGCCCTACGGGACATGGCGGTGCTTCTGTTGACCTAGTTATTTTTTCTCTTCATTTGGCTGGTATATCATCAATTCTTGGTGCTATTAATTTTATTACAACTATTTTTAATATACGATCGCCCGGGATAACTATGGAACGATTAAATTTATTTGTTTGATCTATTTTAGTTACTGTGTTCTTACTATTATTATCTCTGCCTGTGTTAGCTGGGGCAATTACAATGCTTTTAACTGACCGGAATTTTAATACAAGTTTTTTTGACCCGGCTGGAGGTGGGGATCCTATTTTGTATCAGCATTTGTTT
>Seq113_[organism=Platevindex_sp.]_[isolate=2020_71]
GACATTATATATGATTTTTGGTGTTTGATGTGGCTTAGTAGGAACTGGCCTGTCTTTATTAATTCGGTTTGAGCTTGGTACTGCTGGTGTGCTCTTA---GATGACCATTTTTATAATGTTATTGTGACGGCCCATGCATTTGTAATAATTTTCTTCATAGTGATACCCTTAATGATTGGGGGTTTTGGGAATTGAATAGTACCTCTTTTAATTGGGGCACCTGATATGAGATTTCCGCGGATAAATAATATAAGGTTTTGATTACTACCCCCTTCTTTTGTTTTACTGATTGTATCTAGTTTAGTAGAAGGTGGGGCAGGAACTGGCTGAACAGTCTACCCGCCATTGAGCGGCCCTACGGGACATGGCGGTGCTTCTGTTGACCTAGTTATTTTTTCTCTTCATTTGGCGGGTATATCATCAATTCTTGGTGCTATTAATTTTATTACAACTATTTTTAATATACGATCGCCCGGGATAACTATGGAACGATTAAATTTATTTGTTTGATCTATTTTAGTTACTGTGTTTTTACTATTATTATCTCTGCCTGTGTTAGCTGGGGCAATTACAATGCTTTTAACTGACCGGAATTTTAATACAAGTTTTTTTGACCCGGCTGGAGGTGGGGATCCTATTTTGTATCAGCATTTGTTT
>Seq114_[organism=Platevindex_sp.]_[isolate=2020_76]
GACATTATATATGATTTTTGGTGTTTGATGTGGCTTAGTAGGAACTGGCCTGTCTTTATTAATTCGGTTTGAGCTTGGTACTGCTGGTGTGCTCTTA---GATGACCATTTTTATAATGTTATTGTGACGGCCCATGCATTTGTAATAATTTTCTTCATAGTGATACCCTTAATGATTGGGGGTTTTGGGAATTGAATAGTACCTCTTTTAATTGGGGCACCTGATATGAGATTTCCGCGGATAAATAATATAAGGTTTTGATTACTACCCCCTTCTTTTGTTTTACTGATTGTATCTAGTTTAGTAGAAGGTGGGGCAGGAACTGGCTGAACAGTCTACCCGCCATTGAGCGGCCCTACGGGACATGGCGGTGCTTCTGTTGACCTAGTTATTTTTTCTCTTCATTTGGCTGGTATATCATCAATTCTTGGTGCTATTAATTTTATTACAACTATTTTTAATATACGATCGCCCGGGATAACTATGGAACGATTAAATTTATTTGTTTGATCTATTTTAGTTACTGTGTTTTTACTATTATTATCTCTGCCTGTGTTAGCTGGGGCAATTACAATGCTTTTAACTGACCGGAATTTTAATACAAGTTTTTTTGACCCGGCTGGAGGTGGGGATCCTATTTTGTATCAGCATTTGTTT
>Seq115_[organism=Reticunassa_festiva]_[isolate=2020_51]
AACGTTATATATTTTATTCGGAATATGATCAGGACTAGTTGGGACAGCTTTGAGTCTTTTAATTCGTGCTGAATTAGGTCAACCTGGAGCACTTTTAGGTGATGACCAACTTTATAATGTAATTGTTACAGCTCATGCGTTTGTAATGATTTTCTTTTTAGTAATACCTATGATAATTGGAGGATTCGGAAATTGATTAGTTCCGTTGATATTAGGAGCTCCTGATATAGCCTTTCCTCGACTAAATAATATAAGATTTTGATTGCTTCCTCCAGCGCTTTTACTTTTGCTCTCTTCAGCAGCAGTAGAAAGTGGGGCAGGTACCGGATGAACAGTATATCCACCTTTATCTAGTAATTTAGCTCATGCTGGTGGTTCAGTTGATTTAGCAATTTTTTCACTTCATTTAGCGGGTGTATCTTCGATTCTAGGAGCTGTAAACTTTATTACAACTATTATTAATATACGATGGCGAGGGATACAGTTTGAGCGTTTACCTCTATTTGTTTGGTCAGTAAAAATTACTGCTATTTTATTACTTCTTTCTCTACCTGTATTAGCTGGAGCCATTACAATACTTCTAACGGACCGAAATTTTAATACTGCTTTCTTCGATCCAGCAGGAGGTGGTGATCCAATTTTATACCAACATTTATTT
>Seq116_[organism=Terebralia_sulcata]_[isolate=2019_80.119]
TACTTTATATATTTTGTTTGGTATATGATCTGGCTTAGTTGGGACCGCCCTTAGTCTTTTAATCCGAGCTGAGTTAGGACAACCTGGGGCTTTGCTTGGTGATGATCAATTATATAATGTAATTGTCACAGCTCATGCGTTTGTTATAATTTTCTTTCTGGTTATGCCTATAATGATTGGAGGATTTGGAAATTGATTAGTGCCTCTAATGCTTGGAGCTCCAGATATGGCTTTTCCTCGGCTTAATAACATGAGTTTTTGACTTCTTCCTCCGGCACTTCTTCTTTTACTGTCCTCTGCTGCTGTAGAAAGTGGAGTGGGGACTGGATGAACTGTGTATCCACCTTTGGCCGGTAATTTGGCTCATGCGGGGGGTTCCGTTGATCTGGCTATTTTTTCTCTTCATTTAGCTGGTGTTTCTTCTATTTTAGGTGCAGTGAATTTTATTACAACTATTATTAATATACGATGGCGGGGTATAGCGTTTGAGCGATTGCCTTTGTTCGTATGGTCTGTAAAAATTACTGCAATTCTTCTTCTTTTATCTCTTCCTGTACTGGCAGGTGCAATTACGATGCTTTTAACGGATCGGAACTTTAATACGGCGTTCTTTGATCCGGCCGCGGGTGGAGATCCTATTTTGTATCAACACTTGTTT
>Seq117_[organism=Terebralia_sulcata]_[isolate=2019_117.155]
TACTTTATATATTTTGTTTGGTATATGATCTGGCTTAGTTGGGACCGCCCTTAGTCTTTTAATCCGAGCTGAGTTAGGACAACCTGGGGCTTTGCTTGGTGATGATCAATTATATAATGTAATTGTCACAGCTCATGCGTTTGTTATAATTTTCTTTCTGGTTATGCCTATAATGATTGGAGGATTTGGAAATTGATTAGTGCCTCTAATGCTTGGAGCTCCAGATATGGCTTTTCCTCGGCTTAATAACATGAGTTTTTGACTTCTTTCTCCGGCACTTCTTCTTTTACTGTCCTCTGCTGCTGTAGAAAGTGGAGTGGGGACTGGATGAACTGTGTATCCACCTTTGGCCGGTAATTTGGCTCATGCGGGGGGTTCCGTTGATCTGGCTATTTTTTCTCTTCATTTAGCTGGTGTTTCTTCTATTTTAGGTGCAGTGAATTTTATTACAACTATTATTAATATACGATGGCGGGGTATAGCGTTTGAGCGATTGCCTTTGTTCGTATGGTCTGTAAAAATTACTGCAATTCTTCTTCTTTTATCTCTTCCTGTACTGGCAGGTGCAATTACGATGCTTTTAACGGATCGGAACTTTAATACGGCGTTCTTTG--------------------------------------------
>Seq118_[organism=Terebralia_sulcata]_[isolate=2019_124.162]
TACTTTATATATTTTGTTTGGTATATGATCTGGCTTAGTTGGGACCGCCCTTAGTCTTTTAATCCGAGCTGAGTTAGGACAACCTGGGGCTTTGCTTGGTGATGATCAATTATATAATGTAATTGTCACAGCTCATGCGTTTGTTATAATTTTCTTTCTGGTTATGCCTATAATGATTGGAGGATTTGGAAATTGATTAGTGCCTCTAATGCTTGGAGCTCCAGATATGGCTTTTCCTCGGCTTAATAACATGAGTTTTTGACTTCTTTCTCCGGCACTTCTTCTTTTACTGTCCTCTGCTGCTGTAGAAAGTGGAGTGGGGACTGGATGAACTGTGTATCCACCTTTGGCCGGTAATTTGGCTCATGCGGGGGGTTCCGTTGATCTGGCTATTTTTTCTCTTCATTTAGCTGGTGTTTCTTCTATTTTAGGTGCAGTGAATTTTATTACAACTATTATTAATATACGATGGCGGGGTATAGCGTTTGAGCGATTGCCTTTGTTCGTATGGTCTGTAAAAATTACTGCAATTCTTCTTCTTTTATCTCTTCCTGTACTGGCAGGTGCAATTACGATGCTTTTAACGGATCGGAACTTTAATACGGCGTTCTTTGATCCGGCCGCGG--------------------------------
>Seq119_[organism=Terebralia_sulcata]_[isolate=2019_131.169]
---------------------TATATGATCTGGCTTAGTTGGAACCGCCCTTAGCCTTTTAATCCGAGCTGAGTTAGGACAACCTGGGGCTTTGCTTGGTGATGATCAATTATATAATGTAATTGTCACAGCTCATGCGTTTGTTATAATTTTCTTCCTGGTTATGCCTATAATGATTGGAGGATTTGGAAATTGATTAGTGCCTCTAATGCTTGGAGCTCCAGATATGGCTTTTCCTCGGCTTAACAACATGAGTTTTTGACTTCTTCCTCCGGCACTTCTTCTTTTGCTGTCCTCTGCTGCTGTAGAAAGTGGAGTGGGAACTGGATGAACTGTGTATCCACCTTTGGCCGGTAATTTGGCTCATGCGGGGGGTTCCGTTGATCTAGCTATTTTTTCTCTTCATCTAGCTGGTGTTTCTTCTATTTTAGGTGCAGTGAATTTTATTACAACTATTATTAATATACGATGGCGGGGTATAGCGTTTGAGCGATTGCCTTTGTTCGTATGGTCTGTAAAAATTACTGCAATTCTTCTTCTTTTATCCCTTCCTGTACTGGCAGGTGCAATTACGATGCTTTTAACGGATCGGAATTTTAATACGGCGTTCTTTG--------------------------------------------
>Seq120_[organism=Terebralia_sulcata]_[isolate=2019_50.91]
TACTTTATATATTTTGTTTGGTATATGATCTGGCTTAGTTGGGACCGCCCTTAGTCTTTTAATCCGAGCTGAGTTAGGACAACCTGGGGCTTTGCTTGGTGATGATCAATTATATAATGTAATTGTCACAGCTCATGCGTTTGTTATAATTTTCTTCCTGGTTATGCCTATAATGATTGGAGGATTTGGAAATTGATTAGTACCTCTAATGCTTGGAGCTCCAGATATGGCTTTTCCTCGGCTTAACAACATGAGTTTTTGACTTCTTCCTCCGGCACTTCTTCTTTTGTTGTCCTCTGCTGCTGTAGAAAGTGGGGTAGGGACTGGATGAACTGTGTATCCACCTTTGGCCGGTAATTTGGCTCATGCGGGGGGTTCCGTTGATCTGGCTATTTTTTCTCTTCATCTAGCTGGTGTTTCTTCTATTTTAGGTGCAGTGAATTTTATTACAACTATTATTAATATACGATGGCGGGGTATAGCGTTTGAGCGATTGCCTTTGTTCGTATGGTCTGTAAAAATTACTGCAATTCTTCTTCTTTTATCCCTTCCTGTACTGGCAGGTGCAATTACGATGCTTTTAACGGATCGGAATTTTAATACGGCGTTCTTTGATCCGGCCGCGGGTGGAGATCCTATTTTATATCAACACTTATTT
>Seq121_[organism=Terebralia_sulcata]_[isolate=2019_51.92]
TACTTTATATATTTTGTTTGGTATATGATCTGGCTTAGTTGGGACCGCCCTTAGTCTTTTAATCCGAGCTGAGTTAGGACAACCTGGGGCTTTGCTTGGTGATGATCAATTATATAATGTAATTGTCACAGCTCATGCGTTTGTTATAATTTTCTTTCTGGTTATGCCTATAATGATTGGAGGATTTGGAAATTGATTAGTGCCCCTAATGCTTGGAGCTCCAGATATGGCTTTTCCTCGGCTTAACAACATGAGTTTTTGACTTCTTCCTCCGGCACTTCTTCTTTTACTGTCCTCTGCTGCCGTAGAAAGTGGAGTGGGGACTGGATGAACTGTGTATCCACCTTTGGCCGGTAATTTGGCTCATGCGGGGGGTTCCGTTGATCTGGCTATTTTTTCTCTTCATCTAGCTGGTGTTTCTTCTATTTTAGGTGCAGTGAATTTTATTACAACTATTATTAATATACGATGGCGGGGTATAGCGTTTGAGCGATTGCCTTTGTTCGTGTGGTCTGTAAAAATTACTGCAATTCTTCTTCTTTTATCCCTTCCTGTACTGGCAGGTGCAATTACGATGCTTTTAACGGATCGGAATTTTAATACGGCGTTCTTTGATCCGGCCGCGGGTGGAGATCCTATTTTGTATCAACACTTGTTT
>Seq122_[organism=Terebralia_sulcata]_[isolate=2019_52.93]
TACTTTATATATTTTGTTTGGTATATGATCTGGCTTAGTTGGGACCGCCCTTAGTCTTTTAATCCGAGCTGAGTTAGGACAACCTGGGGCTTTGCTTGGTGATGATCAATTATATAATGTAATTGTCACAGCTCATGCGTTTGTTATAATTTTCTTTCTGGTTATGCCTATAATGATTGGAGGATTTGGAAATTGATTAGTGCCCCTAATGCTTGGAGCTCCAGATATGGCTTTTCCTCGGCTTAACAACATGAGTTTTTGACTTCTTCCTCCGGCACTTCTTCTTTTACTGTCCTCTGCTGCCGTAGAAAGTGGAGTGGGGACTGGATGAACTGTGTATCCACCTTTGGCCGGTAATTTGGCTCATGCGGGGGGTTCCGTTGATCTGGCTATTTTTTCTCTTCATCTAGCTGGTGTTTCTTCTATTTTAGGTGCAGTGAATTTTATTACAACTATTATTAATATACGATGGCGGGGTATAGCGTTTGAGCGATTGCCTTTGTTCGTGTGGTCTGTAAAAATTACTGCAATTCTTCTTCTTTTATCCCTTCCTGTACTGGCAGGTGCAATTACGATGCTTTTAACGGATCGGAATTTTAATACGGCGTTCTTTGATCCGGCCGCGGGTGGAGATCCTATTTTGTATCAACACTTGTTT
>Seq123_[organism=Terebralia_sulcata]_[isolate=2019_53.94]
TACTTTATATATTTTGTTTGGTATATGATCTGGCTTAGTTGGGACCGCCCTTAGTCTTTTAATCCGAGCTGAGTTAGGACAACCTGGGGCTTTGCTTGGTGATGATCAATTATATAATGTAATTGTCACAGCTCATGCGTTTGTTATAATTTTCTTTCTGGTTATGCCTATAATGATTGGAGGATTTGGAAATTGATTAGTGCCTCTAATGCTTGGAGCTCCAGATATGGCTTTTCCTCGGCTTAATAACATGAGTTTTTGACTTCTTCCTCCGGCACTTCTTCTTTTACTGTCCTCTGCTGCTGTAGAAAGTGGAGTGGGGACTGGATGAACTGTGTATCCACCTTTGGCCGGTAATTTGGCTCATGCGGGGGGTTCCGTTGATCTGGCTATTTTTTCTCTTCATTTAGCTGGTGTTTCTTCTATTTTAGGTGCAGTGAATTTTATTACAACTATTATTAATATACGATGGCGGGGTATAGCGTTTGAGCGATTGCCTTTGTTCGTATGGTCTGTAAAAATTACTGCAATTCTTCTTCTTTTATCTCTTCCTGTACTGGCAGGTGCAATTACGATGCTTTTAACGGATCGGAACTTTAATACGGCGTTCTTTGATCCGGCCGCGGGTGGAGATCCTATTTTGTATCAACACTTGTTT
>Seq124_[organism=Terebralia_sulcata]_[isolate=2019_73.113]
TACTTTATATATTTTGTTTGGTATATGATCTGGCTTAGTTGGGACCGCCCTTAGTCTTTTAATCCGAGCTGAGTTAGGACAACCTGGGGCTTTGCTTGGTGATGATCAATTATATAATGTAATTGTCACAGCTCATGCGTTTGTTATAATTTTCTTTCTGGTTATGCCTATAATGATTGGAGGATTTGGAAATTGATTAGTGCCTCTAATGCTTGGAGCTCCAGATATGGCTTTTCCTCGGCTTAATAACATGAGTTTTTGACTTCTTCCTCCGGCACTTCTTCTTTTACTGTCCTCTGCTGCTGTAGAAAGTGGAGTGGGGACTGGATGAACTGTGTATCCACCTTTGGCCGGTAATTTGGCTCATGCGGGGGGTTCCGTTGATCTGGCTATTTTTTCTCTTCATTTAGCTGGTGTTTCTTCTATTTTAGGTGCAGTGAATTTTATTACAACTATTATTAATATACGATGGCGGGGTATAGCGTTTGAGCGATTGCCTTTGTTCGTATGGTCTGTAAAAATTACTGCAATTCTTCTTCTTTTATCTCTTCCTGTACTGGCAGGTGCAATTACGATGCTTTTAACGGATCGGAACTTTAATACGGCGTTCTTTGATCCGGCCGCGGGTGGAGATCCTATTTTGTATCAACACTTGTTT
>Seq125_[organism=Terebralia_sulcata]_[isolate=2019_78.117]
TACTTTATATATTTTGTTTGGTATATGATCTGGCTTAGTTGGGACCGCCCTTAGTCTTTTAATCCGAGCTGAGTTAGGACAACCTGGGGCTTTGCTTGGTGATGATCAATTATATAATGTAATTGTCACAGCTCATGCGTTTGTTATAATTTTCTTTCTGGTTATGCCTATAATGATTGGAGGATTTGGGAATTGATTAGTGCCTCTAATGCTTGGAGCTCCAGATATGGCTTTTCCTCGGCTTAATAACATGAGTTTTTGACTTCTTCCTCCGGCACTTCTTCTTTTACTGTCCTCTGCTGCTGTAGAAAGTGGAGTGGGGACTGGATGAACTGTGTATCCACCTTTGGCCGGTAATTTGGCTCATGCGGGGGGTTCCGTTGATCTGGCTATTTTTTCTCTTCATTTAGCTGGTGTTTCTTCTATTTTAGGTGCAGTGAATTTTATTACAACTATTATTAATATACGATGGCGGGGTATAGCGTTTGAGCGATTGCCTTTGTTCGTATGGTCTGTAAAAATTACTGCAATTCTTCTTCTTTTATCTCTTCCTGTACTGGCAGGTGCAATTACGATGCTTTTAACGGATCGGAACTTTAATACGGCGTTCTTTGATCCGGCCGCGGGTGGAGATCCTATTTTGTATCAACACTTGTTT
>Seq126_[organism=Terebralia_sulcata]_[isolate=2019_93.132]
TACTTTATATATTTTGTTTGGTATATGATCTGGCTTAGTTGGGACCGCCCTTAGCCTTTTAATCCGAGCTGAGTTAGGACAACCTGGGGCTTTGCTTGGTGATGATCAATTATATAATGTAATTGTCACAGCTCATGCGTTTGTTATAATTTTCTTCCTGGTTATGCCTATAATGATTGGAGGATTTGGAAATTGATTAGTGCCTCTGATGCTTGGAGCTCCAGATATGGCTTTTCCTCGGCTTAACAACATGAGTTTTTGACTTCTTCCTCCGGCACTTCTTCTTTTGCTGTCCTCTGCTGCTGTAGAAAGTGGAGTGGGGACTGGATGAACTGTGTATCCACCTTTGGCTGGTAATTTGGCTCATGCGGGGGGTTCCGTTGATCTAGCTATTTTTTCTCTTCATCTAGCTGGTGTTTCTTCTATTTTAGGTGCAGTGAATTTTATTACAACTATTATTAATATACGATGGCGGGGTATAGCGTTTGAGCGATTGCCTTTGTTCGTATGATCTGTAAAAATTACTGCAATTCTTCTTCTTTTATCCCTTCCTGTACTGGCAGGTGCAATTACGATGCTTTTAACGGACCGGAATTTTAATACGGCGTTCTTTGATCCGGCCGCGGGTGGAGATCCTATTTTATATCAACACTTATTT
>Seq127_[organism=Wallaconchis_graniferus]_[isolate=2020_73]
TACATTATATATAATTTTTGGTGTATGGTGTGGACTAGTGGGAACTGGTCTTTCATTATTAATTCGGTTTGAGTTAGGAACAGCAGGAGTGTTGCTT---GATGATCATTTTTATAATGTGATTGTGACTGCACATGCTTTTGTAATGATTTTTTTTATAGTTATGCCCCTGATAATTGGAGGGTTTGGAAACTGAATGGTGCCCTTACTTATTGGAGCTCCTGATATAAGATTTCCTCGTATAAATAACATAAGATTTTGATTGCTTCCTCCATCTTTTATTCTTTTAATTATCTCAAGTTTGGTTGAAGGGGGTGCAGGAACGGGGTGAACTGTTTATCCGCCTCTTAGCGGTGCAACTGCTCACGCAGGAGCGTCGGTAGATTTAGTTATTTTTTCTTTGCACTTAGCTGGGATATCCTCTATTTTAGGGGCAATTAATTTTATTACTACTATTTTTAATATACGGTCGCCAGGAATAACTATGGAGCGAGTTAACTTGTTTGTTTGGTCGATTCTAGTGACTGTATTTCTTCTTTTACTATCCTTACCAGTTTTAGCTGGTGCTATTACTATGCTGCTAACAGATCGAAACTTCAATACTAGTTTTTTTGACCCAGCAGGAGGTGGGGATCCTATCTTATATCAACACTTGTTC
>Seq128_[organism=Wallaconchis_graniferus]_[isolate=2020_74]
TACATTATATATAATTTTTGGTGTATGGTGTGGACTAGTGGGAACTGGTCTTTCATTATTAATTCGGTTTGAGTTAGGAACAGCAGGAGTGTTGCTT---GATGATCATTTTTATAATGTGATTGTGACTGCACATGCTTTTGTAATGATTTTTTTTATAGTTATGCCCCTGATAATTGGAGGGTTTGGAAACTGAATGGTGCCCTTACTTATTGGAGCTCCTGATATAAGATTTCCTCGTATAAATAACATAAGATTTTGATTGCTTCCTCCATCTTTTATTCTTTTAATTATCTCAAGTTTGGTTGAAGGGGGTGCAGGAACGGGGTGAACTGTTTATCCGCCTCTTAGCGGTGCAACTGCTCACGCAGGAGCGTCGGTAGATTTAGTTATTTTTTCTTTGCACTTAGCTGGGATATCCTCTATTTTAGGGGCAATTAATTTTATTACTACTATTTTTAATATACGGTCGCCAGGAATAACTATGGAGCGAGTTAACTTGTTTGTTTGGTCGATTCTAGTGACTGTATTTCTTCTTTTACTATCCTTACCAGTTTTAGCTGGTGCTATTACTATGCTGCTAACAGATCGAAACTTCAATACTAGTTTTTTTGACCCAGCAGGAGGTGGGGATCCTATCTTATATCAACACTTGTTC
